# Supplementary material for: The construction of fluorophoric thiazolo-[2,3-b]quinazolinone derivatives: a multicomponent domino synthetic approach
Source: Royal Society of Chemistry journal article supplement (doi:10.1039/d0ra01066a), 2020-01-01
Supplement: d0ra01066a1.pdf [file d0ra01066a1.pdf]

## Electronic supplementary information

### Construction of Fluorophoric Thiazolo-[2,3-b]quinazolinone Derivatives: A Multicomponent Domino synthetic approach

Prajna Parimita Mohanta, Hari Narayan Pati, and Ajaya Kumar Behera\*

Organic Synthesis Laboratory, School of Chemistry, Sambalpur University, Jyoti Vihar, Burla,  
Odisha-768019, India

E-mail: [ajaykumar.behera@yahoo.com](mailto:ajaykumar.behera@yahoo.com); [ajaykumar.behera@suniv.ac.in](mailto:ajaykumar.behera@suniv.ac.in)

#### Table of Contents

|                                                                                                                                         |       |
|-----------------------------------------------------------------------------------------------------------------------------------------|-------|
| 1. General information                                                                                                                  | 2     |
| 2. General procedure for the synthesis of 2-amino-4-aryl thiazole                                                                       | 2     |
| 3. General procedure for the synthesis of 9a-hydroxy-8,8-dimethyl-3,5-diaryl-<br>5,5a,7,8,9,9a-hexahydrothiazolo[2,3-b]quinazolin-6-one | 3     |
| 4. <sup>1</sup> H-NMR spectra for compound <b>1a</b> and <b>1b</b>                                                                      | 21    |
| 5. <sup>1</sup> H, <sup>13</sup> C and Mass spectra for compounds <b>5aa-5aq</b>                                                        | 22-47 |
| 6. <sup>1</sup> H, <sup>13</sup> C and Mass spectra for compounds <b>5ba-5bq</b>                                                        | 47-72 |
| 7. Absorption and Emission intensities at 10 μM conc. in MeOH                                                                           | 73    |

## 1. General information

The reactions were performed in SINEO MAS-II Microwave Synthesizer, Power Voltage: AC 220 V  $\pm$  10% 50Hz AC, Rated Input power: 1360W, Rated high frequency output power: 1000W, Operating frequency: 2450MHz. Melting points were taken in open capillaries using sulphuric acid-bath and are uncorrected. Reactions were monitored by thin-layer chromatography (TLC) using Merck silica gel 60 F254 precoated plates (0.25 mm) in appropriate mixture of ethyl acetate and hexane and visualized under UV-Lamp of 365 nm. Column chromatography was performed using silica gel (60-120 mesh) using hexanes and ethyl acetate mixture as eluent. Isolation of some of the compounds was carried in Prep. HPLC, Agilent technologies 1260.  $^1\text{H}$  NMR and  $^{13}\text{C}$  NMR spectra were recorded on Bruker (400 and 100 MHz, respectively) instrument internally referenced to tetramethylsilane (TMS) or DMSO signals. Chemical shifts were reported in parts per million and multiplicities are as indicated: s (singlet), d (doublet), t (triplet), q (quartet), m (multiplet), and br (broad). Coupling constants,  $J$ , are reported in Hertz. Mass spectra were measured on Agilent 6110 LC-MS instrument (ESI). High-resolution mass spectrum of one of the compounds was recorded TOF mass spectrometer. All the reagents and solvents used were of the best grade available and were used without further purification.

## 2. General procedure for the synthesis of 2-amino-4-aryl thiazole

A mixture of thiourea (15.2 gm, 0.2 mol), acetophenone (11.7 ml, 0.1 mol) and iodine (25.4 gm, 0.1 mol) was refluxed for 8 hours in dry benzene (5 ml) on a water bath. Further heating the mixture for 12 hours without refluxing yielded a hard mass which was kept in contact with ether (20 ml) overnight. After decanting off the ether, it was washed with cold water followed by very dilute solution of sodium thiosulfate. The residue was then extracted three times with boiling water, treated with conc. ammonia and kept overnight. The pale yellow solid was collected by filtration and recrystallized from ethanol.

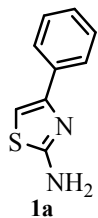

#### 4-phenylthiazol-2-amine

Pale Yellow, 85% yield; m.p: 149-151°C;  $^1\text{H NMR}$  (400 MHz,  $\text{CDCl}_3$ )  $\delta$  5.21 (bs, 2H), 6.72 (s, 1H), 7.27-7.31 (t, 1H), 7.36 (t, 2H), 7.76 (d,  $J = 7.6$  Hz, 2H).

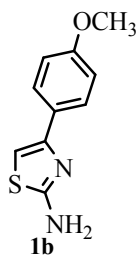

#### 4-(4-methoxyphenyl)thiazol-2-amine

Yellow, 95% yield; m.p: 245-247°C;  $^1\text{H NMR}$  (400 MHz,  $\text{CDCl}_3$ )  $\delta$  3.83 (s, 3H), 4.94 (bs, 2H), 6.54 (s, 1H), 6.90 (d,  $J = 8.8$  Hz, 2H), 7.70 (d,  $J = 8.8$  Hz, 2H).

### 3. General procedure for the synthesis of 9a-hydroxy-8,8-dimethyl-3,5-diaryl-5,5a,7,8,9,9a-hexahydrothiazolo[2,3-b]quinazolin-6-one

The reactions were performed in SINEO MAS-II Microwave Synthesizer. In a 25 ml microwave reaction vessel, a mixture of 2-amino-4-aryl thiazole (0.001 mol), aryl aldehyde (0.001 mol), and cyclic 1,3-dicarbonyl compound (0.001 mol) in 3ml glacial acetic acid was irradiated for a desired time varied from 10-15 minutes (monitored by TLC) at 300 W and 150°C. The reaction mixture was allowed to cool at room temperature and poured onto crushed ice. The solid products thus separated out were filtered, dried and washed with aqueous ethanol. Subsequently, it was recrystallized with water-ethanol (4:96) mixture.

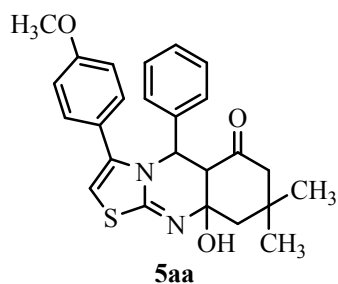

**9a-hydroxy-3-(4-methoxyphenyl)-8,8-dimethyl-5-phenyl-5,5a,7,8,9,9a-hexahydrothiazolo-  
[2,3-b]quinazolin-6-one**

Light green, 73% yield; m.p: 160-163°C; <sup>1</sup>H NMR (400 MHz, DMSO-d<sub>6</sub>) δ 0.98 (s, 3H), 0.99 (s, 3H), 1.91 (s, 2H), 2.04-2.17 (m, 2H), 2.68 (d, *J* = 8.4 Hz, 1H), 3.69 (s, 3H), 3.86 (d, *J* = 8.4 Hz, 1H), 6.69 (d, *J* = 8.8 Hz, 2H), 6.95 (s, 1H), 7.13 (t, 1H), 7.25 (d, *J* = 7.2 Hz, 2H), 7.33 (t, 2H), 7.49 (d, *J* = 8.8 Hz, 2H), 12.21 (bs, 1H); <sup>13</sup>C NMR (100 MHz, DMSO-d<sub>6</sub>) δ 28.41, 29.13, 31.59, 32.12, 36.86, 41.93, 55.39, 56.83, 87.52, 113.87, 115.0, 125.47, 127.17, 127.44, 128.16, 129.52, 129.75, 146.63, 158.86, 166.68, 196.71; **LC-MS (m/z):** [M+H]<sup>+</sup> calcd for C<sub>25</sub>H<sub>26</sub>N<sub>2</sub>O<sub>3</sub>S: 434.5; found: 435.4.

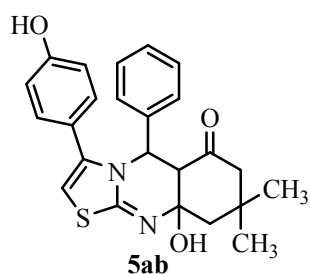

**9a-hydroxy-3-(4-hydroxyphenyl)-8,8-dimethyl-5-phenyl-5,5a,7,8,9,9a-hexahydrothiazolo-  
[2,3-b]quinazolin-6-one**

Yellowish green, 71% yield; m.p: 189-191°C; <sup>1</sup>H NMR (400 MHz, DMSO-d<sub>6</sub>) δ 0.99 (s, 3H), 1.01 (s, 3H), 1.91 (s, 2H), 2.15-2.24 (m, 2H), 2.96 (d, *J* = 8.4 Hz, 1H), 4.11 (d, *J* = 8.4 Hz, 1H), 6.54 (d, *J* = 8.8 Hz, 2H), 6.62 (d, *J* = 8.8 Hz, 2H), 6.87 (s, 1H), 7.05 (t, 1H), 7.20 (t, 2H), 7.34 (d, *J* = 7.6 Hz, 2H), 10.71 (bs, 1H), 11.98 (bs, 1H); <sup>13</sup>C NMR (100 MHz, DMSO-d<sub>6</sub>) δ 28.48, 29.00, 31.54, 32.02, 36.77, 42.34, 56.96, 87.83, 114.89, 115.16, 126.40, 127.11, 128.39, 128.95, 129.69, 134.27, 145.39, 156.65, 166.25, 195.79; **ESI-MS (m/z):** [M+H]<sup>+</sup> calcd for C<sub>24</sub>H<sub>24</sub>N<sub>2</sub>O<sub>3</sub>S: 420.5; found: 421.2.

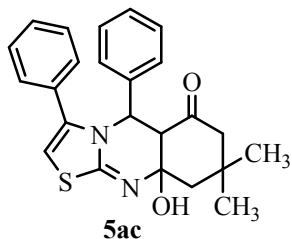

**9a-hydroxy-8,8-dimethyl-3,5-diphenyl-5,5a,7,8,9,9a-hexahydrothiazolo[2,3-b]quinazolin-6-one**

Greenish yellow, 62% yield; m.p: 158-160°C; <sup>1</sup>H NMR (400 MHz, DMSO-d<sub>6</sub>) δ 0.99 (s, 3H), 1.04 (s, 3H), 1.91 (s, 2H), 2.28-2.33 (m, 2H), 2.35 (d, *J* = 8.4 Hz, 1H), 3.85 (d, *J* = 8.4 Hz, 1H), 6.99 (s, 1H), 7.12 (t, 1H), 7.17-7.23 (m, 3H), 7.27(d, *J* = 6.8 Hz, 2H), 7.34 (t, 2H), 7.41 (d, *J* = 7.6 Hz, 2H), 12.24 (bs, 1H); <sup>13</sup>C NMR (100 MHz, DMSO-d<sub>6</sub>) δ 28.31, 29.23, 31.32, 32.17, 37.06, 41.68, 56.21, 89.32, 116.07, 126.27, 126.67, 127.48, 127.88, 128.27, 128.41, 128.60, 129.33, 144.86, 146.73, 196.89; HRMS (*m/z*): [M+H]<sup>+</sup> calcd for C<sub>24</sub>H<sub>24</sub>N<sub>2</sub>O<sub>2</sub>S: 405.1558; found: 405.1637.

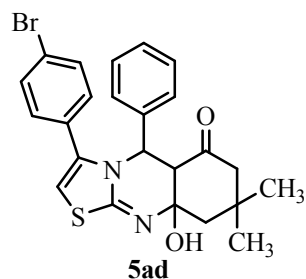

**3-(4-bromophenyl)-9a-hydroxy-8,8-dimethyl-5-phenyl-5,5a,7,8,9,9a-hexahydrothiazolo[2,3-b]quinazolin-6-one**

Pale yellow, 64% yield; m.p: 160-162°C; <sup>1</sup>H NMR (400 MHz, DMSO-d<sub>6</sub>) δ 0.98 (s, 3H), 1.03 (s, 3H), 1.91 (s, 2H), 2.26-2.33 (m, 2H), 2.42 (d, *J* = 8.4 Hz, 1H), 3.87 (d, *J* = 8.4 Hz, 1H), 6.97 (d, *J* = 7.6 Hz, 2H), 7.06 (s, 1H), 7.20 (t, 1H), 7.26 (t, 2H), 7.34 (d, *J* = 8.4 Hz, 2H), 7.46 (d, *J* = 8.4 Hz, 2H), 11.99 (bs, 1H); <sup>13</sup>C NMR (100 MHz, DMSO-d<sub>6</sub>) δ 28.24, 29.01, 31.62, 32.21, 36.76, 41.69, 56.61, 89.53, 114.83, 124.06, 126.87, 127.69, 128.07, 129.11, 130.10, 131.39, 144.04, 145.63, 166.90, 196.40; ESI-MS (*m/z*): [M+H]<sup>2+</sup> calcd for C<sub>24</sub>H<sub>23</sub>BrN<sub>2</sub>O<sub>2</sub>S: 485.4; found: 485.2.

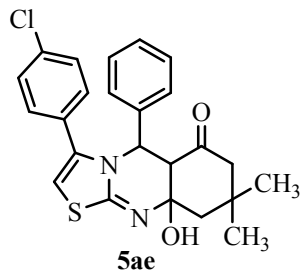

**3-(4-chlorophenyl)-9a-hydroxy-8,8-dimethyl-5-phenyl-5,5a,7,8,9,9a-hexahydrothiazolo[2,3-b]quinazolin-6-one**

Greenish yellow, 68% yield; m.p: 158-161°C; <sup>1</sup>H NMR (400 MHz, DMSO-d<sub>6</sub>) δ 0.98 (s, 3H), 1.03 (s, 3H), 1.92 (s, 2H), 2.22-2.30 (m, 2H), 2.41 (d, *J* = 8.4 Hz, 1H), 3.86 (d, *J* = 8.4 Hz, 1H), 6.98 (d, *J* = 8.8 Hz, 2H), 7.06 (s, 1H), 7.15 (t, 1H), 7.23 (t, 2H), 7.33 (d, *J* = 7.2 Hz, 2H), 7.42 (d, *J* = 8.8 Hz, 2H), 12.28 (bs, 1H); <sup>13</sup>C NMR (100 MHz, DMSO-d<sub>6</sub>) δ 28.34, 29.01, 31.60, 32.20, 36.76, 41.71, 56.46, 89.47, 114.87, 126.96, 127.71, 128.45, 129.11, 129.80, 132.34, 134.13, 144.09, 145.55, 166.88, 196.40; **ESI-MS (m/z)**: [M+H]<sup>+</sup> calcd for C<sub>24</sub>H<sub>23</sub>ClN<sub>2</sub>O<sub>2</sub>S: 438.9; found: 439.1.

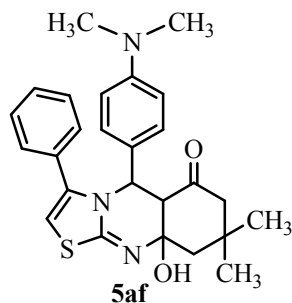

**5-(4-(dimethylamino)phenyl)-9a-hydroxy-8,8-dimethyl-3-phenyl-5,5a,7,8,9,9a-hexahydrothiazolo[2,3-b]quinazolin-6-one**

Brownish yellow, 59% yield; m.p: 160-163°C; <sup>1</sup>H NMR (400 MHz, DMSO-d<sub>6</sub>) δ 0.97 (s, 3H), 1.01 (s, 3H), 1.91 (s, 2H), 2.10-2.20 (m, 2H), 2.79 (s, 6H), 2.86 (d, *J* = 8.4 Hz, 1H), 3.86 (d, *J* = 8.4 Hz, 1H), 6.68 (d, *J* = 8.8 Hz, 2H), 6.94 (s, 1H), 6.99 (d, *J* = 8.8 Hz, 2H), 7.11 (t, 1H), 7.18 (t, 2H), 7.24 (d, *J* = 6.8 Hz, 2H), 12.19 (bs, 1H); <sup>13</sup>C NMR (100 MHz, DMSO-d<sub>6</sub>) δ 28.52, 29.19, 31.63, 32.35, 36.21, 40.99, 43.70, 56.43, 89.77, 112.72, 112.78, 127.65, 128.48, 129.19, 130.76, 146.19, 149.60, 166.61, 196.71; **ESI-MS (m/z)**: [M+H]<sup>+</sup> calcd for C<sub>26</sub>H<sub>29</sub>N<sub>3</sub>O<sub>2</sub>S: 447.6; found 448.3.

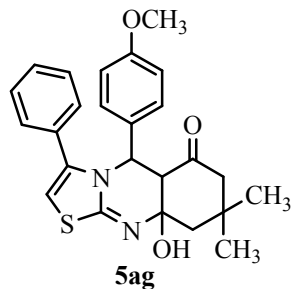

**9a-hydroxy-5-(4-methoxyphenyl)-8,8-dimethyl-3-phenyl-5,5a,7,8,9,9a-hexahydrothiazolo-  
[2,3-b]quinazolin-6-one**

Yellowish green, 71% yield; m.p: 156-158°C; <sup>1</sup>H NMR (400 MHz, DMSO-d<sub>6</sub>) δ 0.99 (s, 3H), 1.01 (s, 3H), 2.13 (s, 2H), 2.25-2.30 (m, 2H), 2.64 (d, *J* = 8.4 Hz, 1H), 3.64 (d, *J* = 8.4 Hz, 1H), 3.72 (s, 3H), 6.73 (d, *J* = 8.8 Hz, 2H), 6.88 (d, *J* = 8.4 Hz, 2H), 6.99 (s, 1H), 7.09 (t, 1H), 7.22 (t, 2H), 7.34 (d, *J* = 7.2 Hz, 2H), 12.21 (bs, 1H); <sup>13</sup>C NMR (100 MHz, DMSO-d<sub>6</sub>) δ 28.10, 29.07, 31.10, 32.10, 36.12, 41.28, 55.18, 55.44, 88.73, 113.37, 114.51, 127.82, 128.20, 128.71, 129.23, 135.31, 136.37, 146.74, 157.92, 166.31, 196.34; **ESI-MS (m/z):** [M+H]<sup>+</sup> calcd for C<sub>25</sub>H<sub>26</sub>N<sub>2</sub>O<sub>3</sub>S: 434.5; found: 435.21.

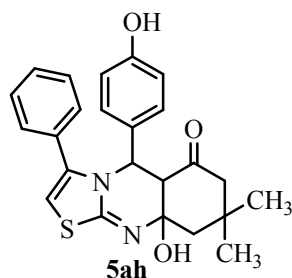

**9a-hydroxy-5-(4-hydroxyphenyl)-8,8-dimethyl-3-phenyl-5,5a,7,8,9,9a-hexahydrothiazolo-  
[2,3-b]quinazolin-6-one**

Greenish yellow, 63% yield; m.p: 156-159°C; <sup>1</sup>H NMR (400 MHz, DMSO-d<sub>6</sub>) δ 0.95 (s, 3H), 0.98 (s, 3H), 2.14 (s, 2H), 2.30-2.39 (m, 2H), 2.59 (d, *J* = 8.4 Hz, 1H), 3.82 (d, *J* = 8.4 Hz, 1H), 6.52 (d, *J* = 8.4 Hz, 2H), 6.86 (s, 1H), 6.95 (d, *J* = 7.6 Hz, 2H), 7.19 (t, 1H), 7.39 (t, 2H), 7.69 (d, *J* = 8.4 Hz, 2H), 10.88 (bs, 1H), 11.93 (bs, 1H); <sup>13</sup>C NMR (100 MHz, DMSO-d<sub>6</sub>) δ 28.29, 29.09, 31.75, 32.15, 36.43, 42.35, 56.35, 89.32, 106.34, 116.41, 127.88, 128.24, 128.59, 129.71, 129.86, 135.30, 143.70, 157.11, 166.90; **LC-MS (m/z):** [M+H]<sup>+</sup> calcd for C<sub>24</sub>H<sub>24</sub>N<sub>2</sub>O<sub>3</sub>S: 420.5; found 421.3.

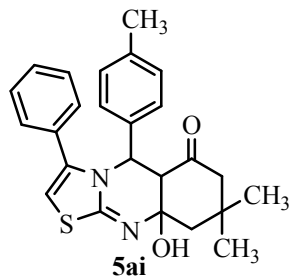

**9a-hydroxy-8,8-dimethyl-3-phenyl-5-p-tolyl-5,5a,7,8,9,9a-hexahydrothiazolo[2,3-b]quinazolin-6-one**

Light green, 58% yield; m.p: 158-161°C;  $^1\text{H NMR}$  (400 MHz, DMSO- $d_6$ )  $\delta$  0.99 (s, 3H), 1.02 (s, 3H), 1.91 (s, 2H), 2.13-2.23 (m, 2H), 2.28 (s, 3H), 2.39 (d,  $J = 8.4$  Hz, 1H), 3.81 (d,  $J = 8.4$  Hz, 1H), 6.86 (d,  $J = 8$  Hz, 2H), 6.97 (s, 1H), 6.99 (t, 1H), 7.12 (d,  $J = 8$  Hz, 2H), 7.19 (t, 2H), 7.40 (d,  $J = 6.8$  Hz, 2H), 11.96 (bs, 1H);  $^{13}\text{C NMR}$  (100 MHz, DMSO- $d_6$ )  $\delta$  21.52, 28.39, 29.16, 31.60, 32.13, 36.53, 41.56, 56.61, 89.44, 115.02, 127.15, 127.71, 128.23, 128.80, 129.71, 134.29, 135.48, 136.54, 146.65, 166.75, 196.53; **LC-MS (m/z):**  $[\text{M}+\text{H}]^+$  calcd for  $\text{C}_{25}\text{H}_{26}\text{N}_2\text{O}_2\text{S}$ : 418.5; found 419.2.

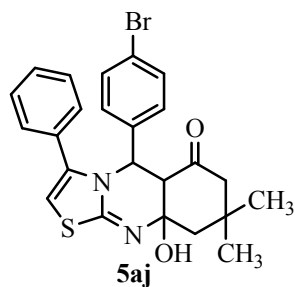

**5-(4-bromophenyl)-9a-hydroxy-8,8-dimethyl-3-phenyl-5,5a,7,8,9,9a-hexahydrothiazolo[2,3-b]quinazolin-6-one**

Light yellow, 63% yield; m.p: 180-182°C;  $^1\text{H NMR}$  (400 MHz, DMSO- $d_6$ )  $\delta$  0.99 (s, 3H), 1.02 (s, 3H), 1.91 (s, 2H), 2.25-2.31 (m, 2H), 2.60 (d,  $J = 8.4$  Hz, 1H), 3.82 (d,  $J = 8.4$  Hz, 1H), 6.79 (d,  $J = 7.6$  Hz, 2H), 7.02 (s, 1H), 7.13 (t, 1H), 7.30 (t, 2H), 7.38 (d,  $J = 8.8$  Hz, 2H), 7.47 (d,  $J = 8.8$  Hz, 2H), 12.28 (bs, 1H);  $^{13}\text{C NMR}$  (100 MHz, DMSO- $d_6$ )  $\delta$  28.42, 28.95, 31.54, 32.61, 36.41, 41.32, 56.20, 89.81, 114.48, 122.89, 127.74, 128.12, 128.46, 129.40, 129.95, 131.94, 135.20, 144.02, 166.78, 196.45; **LC-MS (m/z):**  $[\text{M}+\text{H}]^+$  calcd for  $\text{C}_{24}\text{H}_{23}\text{BrN}_2\text{O}_2\text{S}$ : 483.4; found 484.1.



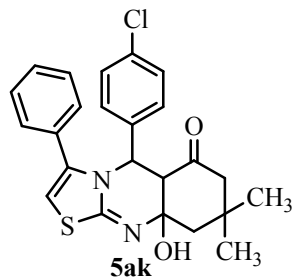

**5-(4-chlorophenyl)-9a-hydroxy-8,8-dimethyl-3-phenyl-5,5a,7,8,9,9a-hexahydrothiazolo[2,3-b]quinazolin-6-one**

light green, 64% yield; m.p: 157-159°C;  $^1\text{H NMR}$  (400 MHz, DMSO- $d_6$ )  $\delta$  0.95 (s, 3H), 0.99 (s, 3H), 1.91 (s, 2H), 2.26 (s, 2H), 2.42 (d,  $J = 8.4$  Hz, 1H), 4.08 (d,  $J = 8.4$  Hz, 1H), 6.92 (d,  $J = 6.4$  Hz, 2H), 7.10 (s, 1H), 7.11 (t, 1H), 7.18 (t, 2H), 7.25 (d,  $J = 7.6$  Hz, 2H), 7.38 (d,  $J = 8.4$  Hz, 2H), 12.28 (bs, 1H);  $^{13}\text{C NMR}$  (100 MHz, DMSO- $d_6$ )  $\delta$  28.59, 29.13, 31.12, 32.50, 36.69, 41.42, 56.26, 89.24, 115.70, 127.99, 128.31, 128.68, 129.22, 132.16, 135.37, 136.53, 143.98, 166.82, 196.62; **ESI-MS (m/z):**  $[\text{M}+\text{H}]^+$  calcd for  $\text{C}_{24}\text{H}_{23}\text{ClN}_2\text{O}_2\text{S}$ : 438.9; found 437.3.

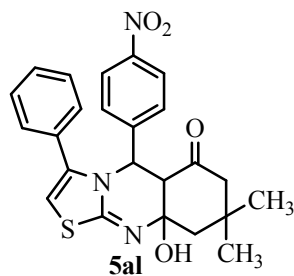

**9a-hydroxy-8,8-dimethyl-5-(4-nitrophenyl)-3-phenyl-5,5a,7,8,9,9a-hexahydrothiazolo[2,3-b]quinazolin-6-one**

Ocean blue, 62% yield; m.p: 188-191°C;  $^1\text{H NMR}$  (400 MHz, DMSO- $d_6$ )  $\delta$  0.95 (s, 3H), 1.03 (s, 3H), 1.91 (s, 2H), 2.10-2.18 (m, 2H), 2.68 (d,  $J = 8.4$  Hz, 1H), 4.04 (d,  $J = 8.4$  Hz, 1H), 7.11 (s, 1H), 7.14 (t, 1H), 7.21 (t, 2H), 7.47 (d,  $J = 8.8$  Hz, 2H), 8.08 (d,  $J = 8.4$  Hz, 2H), 8.22 (d,  $J = 8.8$  Hz, 2H), 11.95 (bs, 1H);  $^{13}\text{C NMR}$  (100 MHz, DMSO- $d_6$ )  $\delta$  28.38, 29.22, 31.95, 32.81, 36.78, 42.16, 56.81, 89.36, 114.47, 123.60, 128.29, 128.69, 129.24, 129.89, 135.15, 144.82, 146.80, 146.92, 166.90, 196.73; **LC-MS (m/z):**  $[\text{M}+\text{H}]^+$  calcd for  $\text{C}_{24}\text{H}_{23}\text{N}_3\text{O}_4\text{S}$ : 449.5; found 450.1.

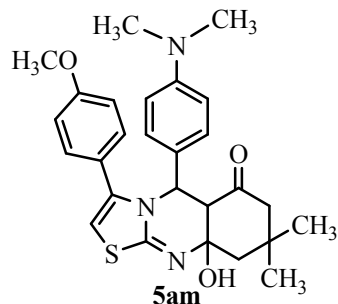

**5-(4-(dimethylamino)phenyl)-9a-hydroxy-3-(4-methoxyphenyl)-8,8-dimethyl-5,5a,7,8,9,9a-hexahydrothiazolo[2,3-b]quinazolin-6-one**

Brownish green, 58% yield; m.p: 160-163°C;  $^1\text{H NMR}$  (400 MHz, DMSO- $d_6$ )  $\delta$  0.91 (s, 3H), 1.03 (s, 3H), 1.90 (s, 2H), 2.08-2.15 (m, 2H), 2.76 (s, 6H), 2.82 (d,  $J = 8.4$  Hz, 1H), 3.51 (s, 3H), 4.08 (d,  $J = 8.4$  Hz, 1H), 6.52 (d,  $J = 8.4$  Hz, 2H), 6.66 (d,  $J = 7.2$  Hz, 2H), 6.80 (s, 1H), 6.97 (d,  $J = 8.8$  Hz, 2H), 7.08 (d,  $J = 8.8$  Hz, 2H);  $^{13}\text{C NMR}$  (100 MHz, DMSO- $d_6$ )  $\delta$  28.48, 29.19, 31.49, 32.14, 35.94, 40.87, 41.61, 55.54, 56.19, 89.67, 112.78, 114.84, 115.23, 127.34, 128.43, 129.19, 129.53, 144.28, 150.03, 156.98, 166.86, 196.87; **ESI-MS (m/z):**  $[\text{M}-\text{H}]^+$  calcd for  $\text{C}_{27}\text{H}_{31}\text{N}_3\text{O}_3\text{S}$ : 477.6; found 476.3.

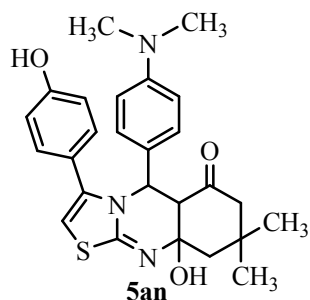

**5-(4-(dimethylamino)phenyl)-9a-hydroxy-3-(4-hydroxyphenyl)-8,8-dimethyl-5,5a,7,8,9,9a-hexahydrothiazolo[2,3-b]quinazolin-6-one**

Brown, 60% yield; m.p: 168-171°C;  $^1\text{H NMR}$  (400 MHz, DMSO- $d_6$ )  $\delta$  0.98 (s, 3H), 1.03 (s, 3H), 1.93 (s, 2H), 2.11-2.18 (m, 2H), 2.87 (s, 6H), 2.95 (d,  $J = 8.4$  Hz, 1H), 3.99 (d,  $J = 8.4$  Hz, 1H), 6.57 (d,  $J = 8.8$  Hz, 2H), 6.64 (d,  $J = 8.8$  Hz, 2H), 6.78 (s, 1H), 6.89 (d,  $J = 8.4$  Hz, 2H), 7.13 (d,  $J = 8.4$  Hz, 2H), 10.46 (bs, 1H), 12.11 (bs, 1H);  $^{13}\text{C NMR}$  (100 MHz, DMSO- $d_6$ )  $\delta$  28.32, 29.08, 31.54, 32.37, 37.02, 41.78, 43.73, 56.44, 89.46, 112.64, 115.26, 116.63, 126.69, 128.73, 129.24, 129.57, 143.67, 146.25, 157.14, 166.14, 196.67; **ESI-MS (m/z):**  $[\text{M}+\text{H}]^+$  calcd for  $\text{C}_{26}\text{H}_{29}\text{N}_3\text{O}_3\text{S}$ : 463.6; found 464.3.

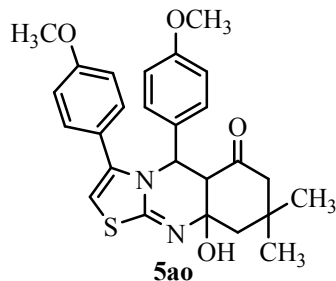

**9a-hydroxy-3,5-bis(4-methoxyphenyl)-8,8-dimethyl-5,5a,7,8,9,9a-hexahydrothiazolo[2,3-b]quinazolin-6-one**

Light green, 68% yield; m.p: 160-163°C;  $^1\text{H NMR}$  (400 MHz, DMSO- $d_6$ )  $\delta$  0.98 (s, 3H), 0.99 (s, 3H), 1.91 (s, 2H), 2.06-2.15 (m, 2H), 2.21 (d,  $J = 8.4$  Hz, 1H), 3.65 (d,  $J = 8.4$  Hz, 1H), 3.69 (s, 3H), 3.74 (s, 3H), 6.69 (d,  $J = 8.8$  Hz, 2H), 6.77 (d,  $J = 8.4$  Hz, 2H), 6.94 (s, 1H), 7.09 (d,  $J = 8.8$  Hz, 2H), 7.15 (d,  $J = 8.8$  Hz, 2H), 12.20 (bs, 1H);  $^{13}\text{C NMR}$  (100 MHz, DMSO- $d_6$ )  $\delta$  28.29, 29.02, 31.46, 32.19, 36.10, 41.09, 55.28, 55.39, 56.97, 87.89, 113.74, 115.15, 116.76, 127.97, 128.12, 128.80, 129.40, 146.26, 157.19, 158.72, 166.45, 196.45; **ESI-MS (m/z):**  $[\text{M}+\text{H}]^+$  calcd for  $\text{C}_{26}\text{H}_{28}\text{N}_2\text{O}_4\text{S}$ : 464.6; found 465.3.

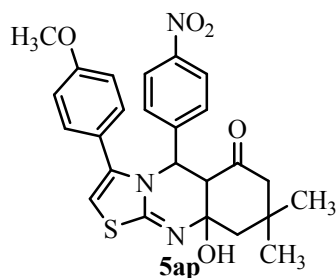

**9a-hydroxy-3-(4-methoxyphenyl)-8,8-dimethyl-5-(4-nitrophenyl)-5,5a,7,8,9,9a-hexahydrothiazolo[2,3-b]quinazolin-6-one**

Midnight blue, 68% yield; m.p: 196-199°C;  $^1\text{H NMR}$  (400 MHz, DMSO- $d_6$ )  $\delta$  0.99 (s, 3H), 1.04 (s, 3H), 1.91 (s, 2H), 2.07-2.15 (m, 2H), 2.30 (d,  $J = 8.4$  Hz, 1H), 3.70 (s, 3H), 3.77 (d,  $J = 8.4$  Hz, 1H), 6.71 (d,  $J = 8.8$  Hz, 2H), 7.06 (s, 1H), 7.13 (d,  $J = 8.8$  Hz, 2H), 7.98 (d,  $J = 8.8$  Hz, 2H), 8.22 (d,  $J = 8.8$  Hz, 2H), 11.96 (bs, 1H);  $^{13}\text{C NMR}$  (100 MHz, DMSO- $d_6$ )  $\delta$  28.41, 29.02, 31.58, 32.37, 37.29, 42.03, 55.42, 56.59, 89.94, 114.0, 114.26, 124.26, 127.70, 128.44, 129.57, 144.88, 147.48, 147.72, 159.03, 166.96, 196.59; **ESI-MS (m/z):**  $[\text{M}+\text{H}]^+$  calcd for  $\text{C}_{25}\text{H}_{25}\text{N}_3\text{O}_5\text{S}$ : 479.5; found 480.2.

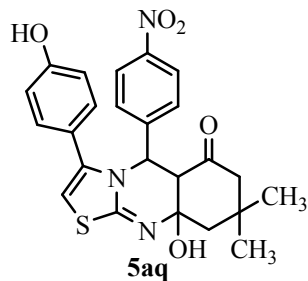

**9a-hydroxy-3-(4-hydroxyphenyl)-8,8-dimethyl-5-(4-nitrophenyl)-5,5a,7,8,9,9a-hexahydrothiazolo[2,3-b]quinazolin-6-one**

Midnight blue, 61% yield; m.p: 158-161°C;  $^1\text{H NMR}$  (400 MHz, DMSO- $d_6$ )  $\delta$  0.98 (s, 3H), 1.03 (s, 3H), 1.90 (s, 2H), 2.03-2.14 (m, 2H), 2.54 (d,  $J = 8.4$  Hz, 2H), 4.10 (d,  $J = 8.4$  Hz, 1H), 6.63 (d,  $J = 8.8$  Hz, 2H), 6.99 (s, 1H), 7.05 (d,  $J = 8.8$  Hz, 2H), 7.96 (d,  $J = 8.8$  Hz, 2H), 8.20 (d,  $J = 8.8$  Hz, 2H), 9.53 (bs, 1H), 12.24 (bs, 1H);  $^{13}\text{C NMR}$  (100 MHz, DMSO- $d_6$ )  $\delta$  28.35, 28.90, 31.42, 32.22, 37.19, 41.98, 56.32, 89.71, 114.51, 115.29, 122.68, 128.20, 129.10, 129.46, 144.64, 146.67, 147.44, 157.16, 166.56, 196.46; **LC-MS (m/z):**  $[\text{M}+\text{H}]^+$  calcd for  $\text{C}_{24}\text{H}_{23}\text{N}_3\text{O}_5\text{S}$ : 465.5; found 466.2.

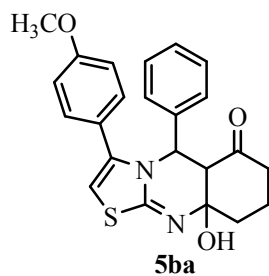

**9a-hydroxy-3-(4-methoxyphenyl)-5-phenyl-5,5a,7,8,9,9a-hexahydrothiazolo[2,3-b]quinazolin-6-one**

Yellowish green, 69% yield; m.p: 172-175°C;  $^1\text{H NMR}$  (400 MHz, DMSO- $d_6$ )  $\delta$  1.92-1.98 (m, 2H), 2.25 (t, 2H), 2.63 (t, 2H), 2.68 (d,  $J = 8.4$  Hz, 1H), 3.69 (s, 3H), 3.87 (d,  $J = 8.4$  Hz, 1H), 6.69 (d,  $J = 8.8$  Hz, 2H), 6.95 (s, 1H), 7.14 (t, 1H), 7.25 (d,  $J = 7.2$  Hz, 2H), 7.33 (t, 2H), 7.51 (d,  $J = 8.8$  Hz, 2H), 12.25 (bs, 1H);  $^{13}\text{C NMR}$  (100 MHz, DMSO- $d_6$ )  $\delta$  20.21, 26.79, 36.75, 41.86, 55.29, 56.94, 87.40, 113.76, 115.89, 125.93, 127.22, 127.67, 128.31, 129.42, 130.11, 146.55, 158.76, 166.55, 196.67. **ESI-MS (m/z):**  $[\text{M}+\text{H}]^+$  calcd for  $\text{C}_{23}\text{H}_{22}\text{N}_2\text{O}_3\text{S}$ : 406.5; found: 407.3.

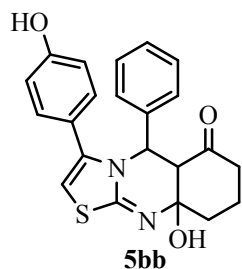

**9a-hydroxy-3-(4-hydroxyphenyl)-5-phenyl-5,5a,7,8,9,9a-hexahydrothiazolo[2,3-b]quinazolin-6-one**

Light yellow, 68% yield; m.p: 214-217°C; <sup>1</sup>H NMR (400 MHz, DMSO-d<sub>6</sub>) δ 1.75-1.83 (m, 2H), 2.26 (t, 2H), 2.61 (t, 2H), 2.89 (d, *J* = 8.4 Hz, 1H), 4.16 (d, *J* = 8.4 Hz, 1H), 6.54 (d, *J* = 8.8 Hz, 2H), 6.62 (d, *J* = 8.8 Hz, 2H), 6.86 (s, 1H), 7.16 (t, 1H), 7.24 (t, 2H), 7.32 (d, *J* = 7.6 Hz, 2H), 10.74 (bs, 1H), 11.91 (bs, 1H); <sup>13</sup>C NMR (100 MHz, DMSO-d<sub>6</sub>) δ 20.18, 26.77, 36.73, 42.38, 56.76, 87.79, 114.83, 115.18, 126.33, 126.51, 128.33, 128.98, 129.43, 134.18, 145.02, 156.95, 165.30, 196.88; **ESI-MS (m/z)**: [M+H]<sup>+</sup> calcd for C<sub>22</sub>H<sub>20</sub>N<sub>2</sub>O<sub>3</sub>S: 392.5; found: 393.2.

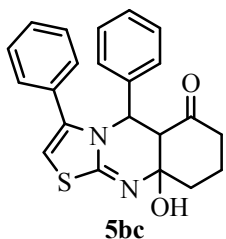

**9a-hydroxy-3,5-diphenyl-5,5a,7,8,9,9a-hexahydrothiazolo[2,3-b]quinazolin-6-one**

Yellow, 58% yield; m.p: 184-187°C; <sup>1</sup>H NMR (400 MHz, DMSO-d<sub>6</sub>) δ 1.91-1.98 (m, 2H), 2.19 (t, 2H), 2.63 (t, 2H), 2.69 (d, *J* = 8.4 Hz, 1H), 3.91 (d, *J* = 8.4 Hz, 1H), 6.99 (s, 1H), 7.11 (t, 1H), 7.18-7.23 (m, 3H), 7.26 (d, *J* = 6.8 Hz, 2H), 7.34 (t, 2H), 7.41 (d, *J* = 7.6 Hz, 2H), 12.25 (s, 1H); <sup>13</sup>C NMR (100 MHz, DMSO-d<sub>6</sub>) δ 21.53, 26.90, 36.85, 41.89, 56.37, 89.73, 115.99, 126.23, 126.62, 127.75, 127.82, 128.24, 128.45, 128.55, 129.18, 144.73, 146.81, 196.95; **ESI-MS (m/z)**: [M+H]<sup>+</sup> calcd for C<sub>22</sub>H<sub>20</sub>N<sub>2</sub>O<sub>2</sub>S: 376.5; found: 377.2.

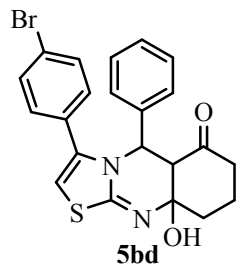

**3-(4-bromophenyl)-9a-hydroxy-5-phenyl-5,5a,7,8,9,9a-hexahydrothiazolo[2,3-b]quinazolin-6-one**

Greenish yellow, 59% yield; m.p: 206-208°C; <sup>1</sup>H NMR (400 MHz, DMSO-d<sub>6</sub>) δ 1.93-1.99 (m, 2H), 2.25 (t, 2H), 2.55 (d, *J* = 8.4 Hz, 1H), 2.64 (t, 2H), 3.86 (d, *J* = 8.4 Hz, 1H), 6.96 (d, *J* = 7.6 Hz, 2H), 7.07 (s, 1H), 7.19 (t, 1H), 7.26 (t, 2H), 7.34 (d, *J* = 8.4 Hz, 2H), 7.60 (d, *J* = 8.4 Hz, 2H); <sup>13</sup>C NMR (100 MHz, DMSO-d<sub>6</sub>) δ 20.33, 26.91, 36.87, 41.80, 56.69, 89.60, 116.0, 124.16, 126.60, 127.80, 128.46, 129.24, 130.22, 131.51, 144.18, 145.75, 167.02, 196.81. **ESI-MS (m/z):** [M+H]<sup>+</sup> calcd for C<sub>22</sub>H<sub>19</sub>BrN<sub>2</sub>O<sub>2</sub>S: 455.4; found: 456.9.

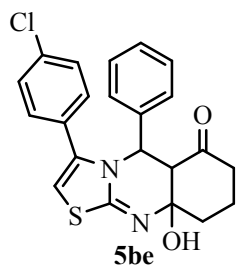

**3-(4-chlorophenyl)-9a-hydroxy-5-phenyl-5,5a,7,8,9,9a-hexahydrothiazolo[2,3-b]quinazolin-6-one**

Yellow, 64% yield; m.p: 202-205°C; <sup>1</sup>H NMR (400 MHz, DMSO-d<sub>6</sub>) δ 1.93-1.99 (m, 2H), 2.25 (t, 2H), 2.43 (d, *J* = 8.4 Hz, 1H), 2.64 (t, 2H), 3.87 (d, *J* = 8.4 Hz, 1H), 6.94 (d, *J* = 8.8 Hz, 2H), 7.06 (s, 1H), 7.19 (t, 1H), 7.27 (t, 2H), 7.37 (d, *J* = 7.2 Hz, 2H), 7.42 (d, *J* = 8.8 Hz, 2H), 12.30 (bs, 1H); <sup>13</sup>C NMR (100 MHz, DMSO-d<sub>6</sub>) δ 20.32, 26.90, 36.85, 41.79, 56.39, 89.50, 115.9, 126.61, 127.82, 128.59, 129.25, 129.91, 132.45, 134.22, 144.20, 145.65, 167.0, 196.83. **ESI-MS (m/z):** [M+H]<sup>+</sup> calcd for C<sub>22</sub>H<sub>19</sub>ClN<sub>2</sub>O<sub>2</sub>S: 410.9; found: 411.3.

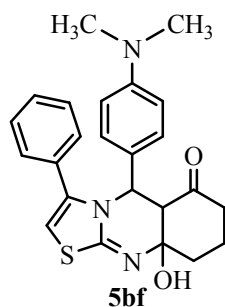

**5-(4-(dimethylamino)phenyl)-9a-hydroxy-3-phenyl-5,5a,7,8,9,9a-hexahydrothiazolo[2,3-b]quinazolin-6-one**

Brownish green, 57% yield; m.p: 178-181°C; <sup>1</sup>H NMR (400 MHz, DMSO-d<sub>6</sub>) δ 1.91-1.98 (m, 2H), 2.23 (t, 2H), 2.61 (t, 2H), 2.81 (s, 6H), 2.86 (d, *J* = 8.4 Hz, 1H), 3.94 (d, *J* = 8.4 Hz, 1H), 6.68 (d, *J* = 8.8 Hz, 2H), 6.94 (s, 1H), 7.0 (d, *J* = 8.8 Hz, 2H), 7.11 (t, 1H), 7.18 (t, 2H), 7.24 (d, *J* = 6.8 Hz, 2H), 12.20 (bs, 1H); <sup>13</sup>C NMR (100 MHz, DMSO-d<sub>6</sub>) δ 20.41, 26.89, 36.96, 41.02, 43.13, 56.79, 89.64, 112.73, 112.79, 127.63, 128.23, 128.47, 129.1, 129.20, 132.24, 146.21, 149.61, 166.60, 196.84; **ESI-MS (m/z):** [M-H]<sup>+</sup> calcd for C<sub>24</sub>H<sub>25</sub>N<sub>3</sub>O<sub>2</sub>S: 419.5; found 418.1.

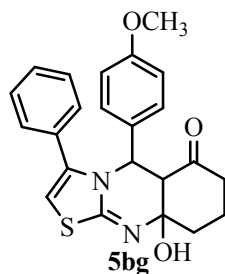

**9a-hydroxy-5-(4-methoxyphenyl)-3-phenyl-5,5a,7,8,9,9a-hexahydrothiazolo[2,3-b]quinazolin-6-one**

Yellow, 64% yield; m.p: 168-171°C; <sup>1</sup>H NMR (400 MHz, DMSO-d<sub>6</sub>) δ 1.92 (m, 2H), 2.25 (t, 2H), 2.62 (t, 2H), 2.67 (d, *J* = 8.4 Hz, 1H), 3.67 (d, *J* = 8.4 Hz, 1H), 3.74 (s, 3H), 6.75 (d, *J* = 8.8 Hz, 2H), 6.90 (d, *J* = 8.4 Hz, 2H), 6.98 (s, 1H), 7.13 (t, 1H), 7.22 (t, 2H), 7.42 (d, *J* = 7.2 Hz, 2H), 12.23 (bs, 1H); <sup>13</sup>C NMR (100 MHz, DMSO-d<sub>6</sub>) δ 20.25, 26.78, 36.78, 41.04, 55.28, 55.39, 88.87, 113.69, 114.30, 127.59, 128.11, 128.81, 129.29, 135.39, 136.70, 146.42, 158.39, 166.59, 196.69; **ESI-MS (m/z):** [M+H]<sup>+</sup> calcd for C<sub>23</sub>H<sub>22</sub>N<sub>2</sub>O<sub>3</sub>S: 406.5; found: 407.2.

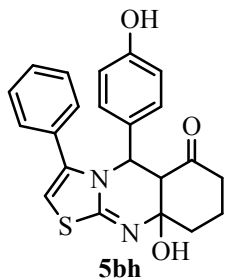

**9a-hydroxy-5-(4-hydroxyphenyl)-3-phenyl-5,5a,7,8,9,9a-hexahydrothiazolo[2,3-b]quinazolin-6-one**

Bright yellow, 57% yield; m.p: 228-231°C;  $^1\text{H NMR}$  (400 MHz,  $\text{DMSO-d}_6$ )  $\delta$  1.91-1.98 (m, 2H), 2.23 (t, 2H), 2.54 (t, 2H), 2.96 (d,  $J = 8.4$  Hz, 1H), 3.85 (d,  $J = 8.4$  Hz, 1H), 6.60 (d,  $J = 8.4$  Hz, 2H), 6.81 (s, 1H), 7.23 (d,  $J = 7.6$  Hz, 2H), 7.32 (t, 1H), 7.43 (t, 2H), 7.88 (d,  $J = 8.4$  Hz, 2H), 10.44 (bs, 1H), 12.23 (bs, 1H);  $^{13}\text{C NMR}$  (100 MHz,  $\text{DMSO-d}_6$ )  $\delta$  21.81, 28.47, 36.80, 42.62, 56.94, 89.80, 106.79, 116.18, 127.66, 128.28, 129.12, 129.42, 130.19, 134.41, 144.57, 157.30, 161.2, 198.10; **ESI-MS (m/z):**  $[\text{M}+\text{H}]^+$  calcd for  $\text{C}_{22}\text{H}_{20}\text{N}_2\text{O}_3\text{S}$ : 392.5; found 393.3.

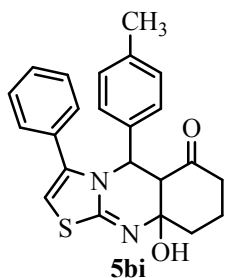

**9a-hydroxy-3-phenyl-5-p-tolyl-5,5a,7,8,9,9a-hexahydrothiazolo[2,3-b]quinazolin-6-one**

Yellowish green, 55% yield; m.p: 179-181°C;  $^1\text{H NMR}$  (400 MHz,  $\text{DMSO-d}_6$ )  $\delta$  1.92-1.98 (m, 2H), 2.23 (t, 2H), 2.29 (s, 3H), 2.40 (d,  $J = 8.4$  Hz, 1H), 2.64 (t, 2H), 3.81 (d,  $J = 8.4$  Hz, 1H), 6.90 (d,  $J = 8$  Hz, 2H), 6.97 (s, 1H), 7.07 (t, 1H), 7.13 (d,  $J = 8$  Hz, 2H), 7.22 (t, 2H), 7.41 (d,  $J = 6.8$  Hz, 2H), 11.99 (bs, 1H);  $^{13}\text{C NMR}$  (100 MHz,  $\text{DMSO-d}_6$ )  $\delta$  20.24, 20.84, 26.78, 36.76, 41.43, 56.74, 89.63, 116.01, 127.03, 127.58, 128.22, 128.88, 129.59, 135.36, 135.50, 136.42, 146.52, 166.62, 196.65; **LC-MS (m/z):** 391.1 found for  $\text{C}_{23}\text{H}_{22}\text{N}_2\text{O}_2\text{S}$ .



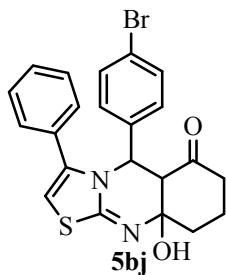

**5-(4-bromophenyl)-9a-hydroxy-3-phenyl-5,5a,7,8,9,9a-hexahydrothiazolo[2,3-b]quinazolin-6-one**

Yellow, 58% yield; m.p: 194-196°C; <sup>1</sup>H NMR (400 MHz, DMSO-d<sub>6</sub>) δ 1.92-1.98 (m, 2H), 2.25-2.28 (t, 2H), 2.63-2.66 (t, 2H), 2.69-2.71 (d, *J* = 8.4 Hz, 1H), 3.86-3.88 (d, *J* = 8.4 Hz, 1H), 6.88 (d, *J* = 7.6 Hz, 2H), 7.05 (s, 1H), 7.19 (t, 1H), 7.27 (t, 2H), 7.39 (d, *J* = 8.8 Hz, 2H), 7.54 (d, *J* = 8.8 Hz, 2H), 12.27 (bs, 1H); <sup>13</sup>C NMR (100 MHz, DMSO-d<sub>6</sub>) δ 20.17, 26.79, 36.70, 41.32, 56.88, 89.28, 115.36, 122.90, 127.74, 128.12, 128.46, 129.95, 130.69, 131.16, 135.20, 144.02, 166.78; **ESI-MS (m/z):** [M+H]<sup>+</sup> calcd for C<sub>22</sub>H<sub>19</sub>BrN<sub>2</sub>O<sub>2</sub>S: 455.3; found 456.1.

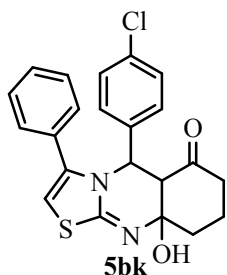

**5-(4-chlorophenyl)-9a-hydroxy-3-phenyl-5,5a,7,8,9,9a-hexahydrothiazolo[2,3-b]quinazolin-6-one**

Light yellow, 61% yield; m.p: 174-176°C; <sup>1</sup>H NMR (400 MHz, DMSO-d<sub>6</sub>) δ 1.91-1.98 (m, 2H), 2.25 (t, 2H), 2.41 (d, *J* = 8.4 Hz, 1H), 2.63 (t, 2H), 3.87 (d, *J* = 8.4 Hz, 1H), 6.94 (d, *J* = 6.4 Hz, 1H), 7.06 (s, 1H), 7.13 (t, 1H), 7.20 (t, 2H), 7.26 (d, *J* = 7.6 Hz, 2H), 7.41 (d, *J* = 8.4 Hz, 2H), 12.29 (bs, 1H); <sup>13</sup>C NMR (100 MHz, DMSO-d<sub>6</sub>) δ 20.29, 26.90, 36.81, 41.36, 56.25, 89.39, 115.52, 127.88, 128.33, 128.59, 129.15, 129.72, 132.06, 135.31, 136.46, 143.70, 166.91; **ESI-MS (m/z):** [M+H]<sup>+</sup> calcd for C<sub>22</sub>H<sub>19</sub>ClN<sub>2</sub>O<sub>2</sub>S: 410.9; found 411.4.

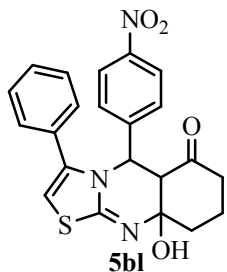

**9a-hydroxy-5-(4-nitrophenyl)-3-phenyl-5,5a,7,8,9,9a-hexahydrothiazolo[2,3-b]quinazolin-6-one**

Bluish green, 58% yield; m.p: 198-201°C;  $^1\text{H NMR}$  (400 MHz, DMSO- $d_6$ )  $\delta$  1.93-1.99 (m, 2H), 2.25 (t, 2H), 2.62 (t, 2H), 2.72 (d,  $J = 8.4$  Hz, 1H), 4.06 (d,  $J = 8.4$  Hz, 1H), 6.80 (s, 1H), 7.11 (t, 1H), 7.25 (t, 2H), 7.47 (d,  $J = 8.8$  Hz, 2H), 8.07 (d,  $J = 8.4$  Hz, 2H), 8.21 (d,  $J = 8.8$  Hz, 2H), 11.98 (bs, 1H);  $^{13}\text{C NMR}$  (100 MHz, DMSO- $d_6$ )  $\delta$  20.12, 26.84, 36.63, 41.83, 56.95, 89.46, 114.78, 123.49, 128.16, 128.51, 129.09, 129.83, 135.08, 144.88, 146.80, 147.54, 166.96, 196.67; **LC-MS (m/z):**  $[\text{M}+\text{H}]^+$  calcd for  $\text{C}_{22}\text{H}_{19}\text{N}_3\text{O}_4\text{S}$ : 421.5; found 422.1.

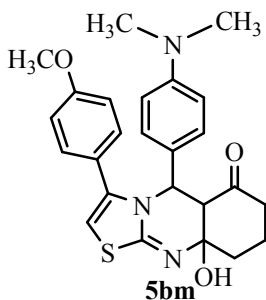

**5-(4-(dimethylamino)phenyl)-9a-hydroxy-3-(4-methoxyphenyl)-5,5a,7,8,9,9a-hexahydrothiazolo[2,3-b]quinazolin-6-one**

Brown, 56% yield; m.p: 184-187°C;  $^1\text{H NMR}$  (400 MHz, DMSO- $d_6$ )  $\delta$  2.01-2.08 (m, 2H), 2.37 (t, 2H), 2.53 (t, 2H), 2.75 (s, 6H), 2.80 (d,  $J = 8.4$  Hz, 1H), 3.54 (s, 3H), 4.07 (d,  $J = 8.4$  Hz, 1H), 6.52 (d,  $J = 8.4$  Hz, 2H), 6.66 (d,  $J = 7.2$  Hz, 2H), 6.80 (s, 1H), 6.96 (d,  $J = 8.8$  Hz, 2H), 7.07 (d,  $J = 8.8$  Hz, 2H);  $^{13}\text{C NMR}$  (100 MHz, DMSO- $d_6$ )  $\delta$  21.39, 26.77, 35.77, 40.51, 41.70, 55.63, 56.67, 89.77, 112.65, 114.85, 115.11, 127.52, 128.25, 129.06, 129.40, 144.19, 150.47, 156.78, 166.09, 196.54; **ESI-MS (m/z):**  $[\text{M}-\text{H}]^+$  calcd for  $\text{C}_{25}\text{H}_{27}\text{N}_3\text{O}_3\text{S}$ : 449.6; found 450.3.

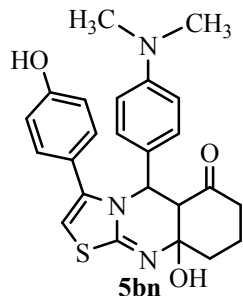

**5-(4-(dimethylamino)phenyl)-9a-hydroxy-3-(4-hydroxyphenyl)-5,5a,7,8,9,9a-hexahydrothiazolo[2,3-b]quinazolin-6-one**

Brownish green, 57% yield; m.p: 179-182°C;  $^1\text{H NMR}$  (400 MHz, DMSO- $d_6$ )  $\delta$  1.91-1.97 (m, 2H), 2.24 (t, 2H), 2.62 (t, 2H), 2.81 (s, 6H), 2.85 (d,  $J = 8.4$  Hz, 1H), 4.04 (d,  $J = 8.4$  Hz, 1H), 6.53 (d,  $J = 8.8$  Hz, 2H), 6.66 (d,  $J = 8.8$  Hz, 2H), 6.81 (s, 1H), 6.97 (d,  $J = 8.4$  Hz, 2H), 7.07 (d,  $J = 8.4$  Hz, 2H), 10.56 (bs, 1H), 12.12 (bs, 1H);  $^{13}\text{C NMR}$  (100 MHz, DMSO- $d_6$ )  $\delta$  20.41, 26.77, 36.94, 41.83, 43.84, 56.61, 89.52, 112.60, 115.32, 116.51, 126.60, 128.87, 129.20, 129.51, 143.75, 146.13, 157.03, 166.18, 196.87; **ESI-MS (m/z)**:  $[\text{M}+\text{H}]^+$  calcd for  $\text{C}_{24}\text{H}_{25}\text{N}_3\text{O}_3\text{S}$ : 435.5; found 436.4.

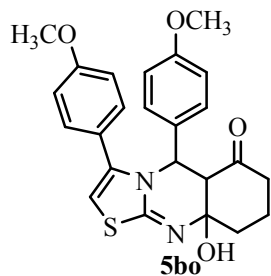

**9a-hydroxy-3,5-bis(4-methoxyphenyl)-5,5a,7,8,9,9a-hexahydrothiazolo[2,3-b]quinazolin-6-one**

Greenish yellow, 64% yield; m.p: 162-165°C;  $^1\text{H NMR}$  (400 MHz, DMSO- $d_6$ )  $\delta$  1.92-1.98 (m, 2H), 2.25 (t, 2H), 2.32 (d,  $J = 8.4$  Hz, 1H), 2.62 (t, 2H), 3.65 (d,  $J = 8.4$  Hz, 1H), 3.70 (s, 3H), 3.74 (s, 3H), 6.69 (d,  $J = 8.8$  Hz, 2H), 6.75 (d,  $J = 8.4$  Hz, 2H), 6.92 (s, 1H), 7.07 (d,  $J = 8.8$  Hz, 2H), 7.15 (d,  $J = 8.8$  Hz, 2H), 12.19 (bs, 1H);  $^{13}\text{C NMR}$  (100 MHz, DMSO- $d_6$ )  $\delta$  20.25, 26.78, 36.78, 41.10, 55.28, 55.39, 56.46, 87.15, 113.74, 114.25, 116.11, 127.98, 128.80, 129.29, 129.40, 146.27, 157.93, 158.72, 166.44, 196.69; **ESI-MS (m/z)**:  $[\text{M}+\text{H}]^+$  calcd for  $\text{C}_{24}\text{H}_{24}\text{N}_2\text{O}_4\text{S}$ : 436.5; found 437.3.

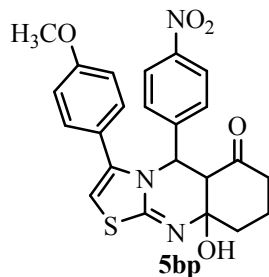

**9a-hydroxy-3-(4-methoxyphenyl)-5-(4-nitrophenyl)-5,5a,7,8,9,9a-hexahydrothiazolo[2,3-b]quinazolin-6-one**

Dark green, 63% yield; m.p: 208-211°C;  $^1\text{H NMR}$  (400 MHz, DMSO- $d_6$ )  $\delta$  1.92-1.98 (m, 2H), 2.26 (t, 2H), 2.34 (d,  $J = 8.4$  Hz, 1H), 2.64 (t, 2H), 3.69 (s, 3H), 3.71 (d,  $J = 8.4$  Hz, 1H), 6.71 (d,  $J = 8.8$  Hz, 2H), 7.07 (s, 1H), 7.14 (d,  $J = 8.8$  Hz, 2H), 8.07 (d,  $J = 8.8$  Hz, 2H), 8.22 (d,  $J = 8.8$  Hz, 2H), 11.97 (bs, 1H);  $^{13}\text{C NMR}$  (100 MHz, DMSO- $d_6$ )  $\delta$  28.41, 29.02, 31.58, 32.37, 37.29, 42.03, 55.42, 56.59, 89.94, 114.0, 114.26, 124.26, 127.70, 128.44, 129.57, 144.88, 147.48, 147.72, 159.03, 166.96, 196.59; **ESI-MS (m/z)**:  $[\text{M}+\text{H}]^+$  calcd for  $\text{C}_{23}\text{H}_{21}\text{N}_3\text{O}_5\text{S}$ : 451.5; found 452.4.

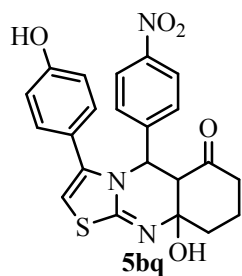

**9a-hydroxy-3-(4-hydroxyphenyl)-5-(4-nitrophenyl)-5,5a,7,8,9,9a-hexahydrothiazolo[2,3-b]quinazolin-6-one**

Teal green, 58% yield; m.p: 238-240°C;  $^1\text{H NMR}$  (400 MHz, DMSO- $d_6$ )  $\delta$  1.92-1.98 (m, 2H), 2.24 (t, 2H), 2.57 (d,  $J = 8.4$  Hz, 1H), 2.64 (t, 2H), 4.11 (d,  $J = 8.4$  Hz, 1H), 6.55 (d,  $J = 8.8$  Hz, 2H), 6.98 (s, 1H), 7.04 (d,  $J = 8.8$  Hz, 2H), 7.94 (d,  $J = 8.8$  Hz, 2H), 8.21 (d,  $J = 8.8$  Hz, 2H), 9.67 (bs, 1H), 12.21 (bs, 1H);  $^{13}\text{C NMR}$  (100 MHz, DMSO- $d_6$ )  $\delta$  21.46, 26.80, 36.60, 42.45, 56.26, 89.31, 114.72, 115.30, 123.50, 128.15, 129.06, 129.47, 144.45, 146.25, 147.41, 157.13, 165.85; **LC-MS (m/z)**:  $[\text{M}+\text{H}]^+$  calcd for  $\text{C}_{22}\text{H}_{19}\text{N}_3\text{O}_5\text{S}$ : 437.4; found 438.1.

#### 4. $^1\text{H}$ NMR spectra of compounds **1a** and **1b**

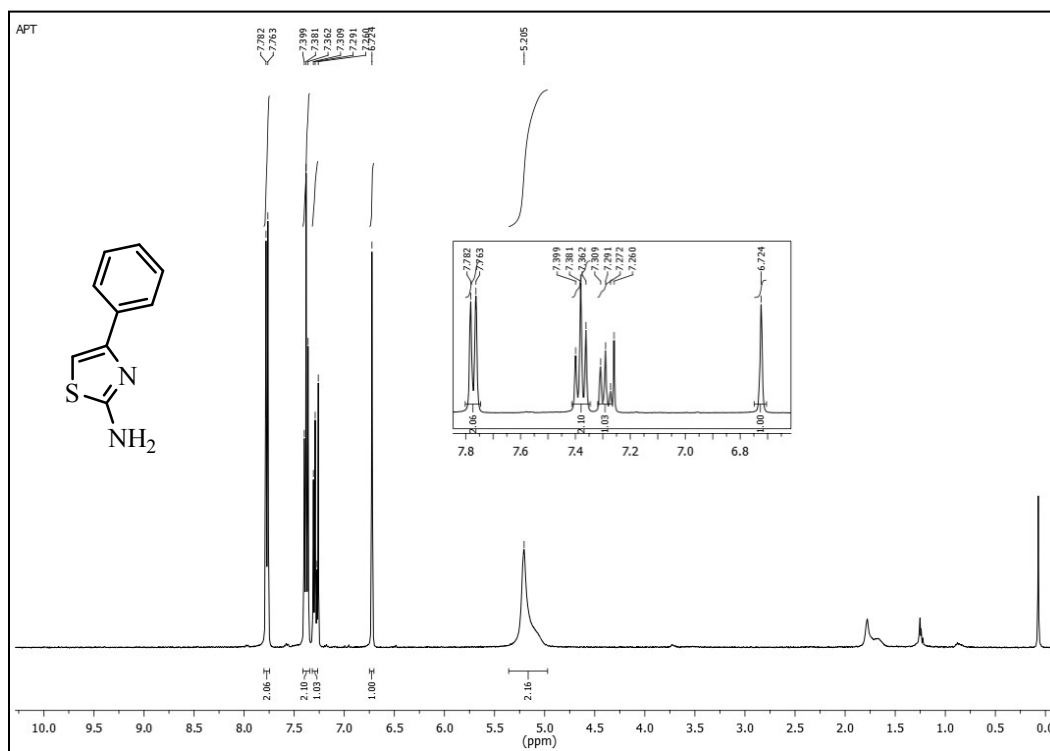

Figure S1.  $^1\text{H}$  NMR spectrum of **1a** in  $\text{CDCl}_3$

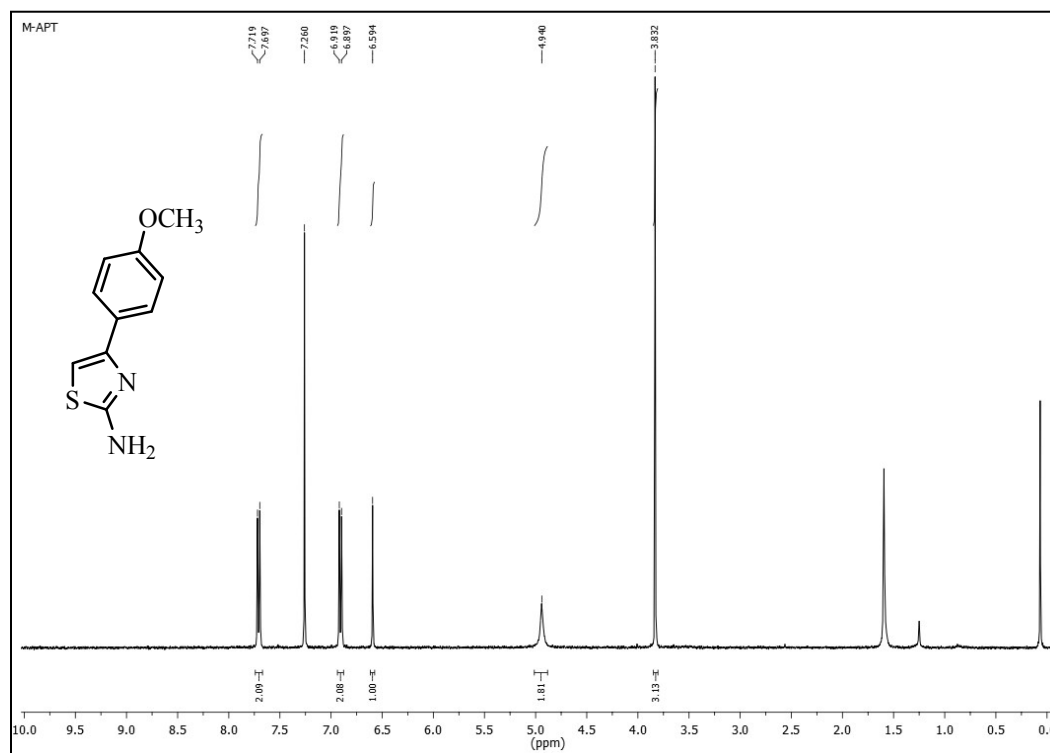

Figure S2.  $^1\text{H}$  NMR spectrum of **1b** in  $\text{CDCl}_3$

## 5. $^1\text{H}$ , $^{13}\text{C}$ NMR and mass spectra of compounds 5aa and 5aq

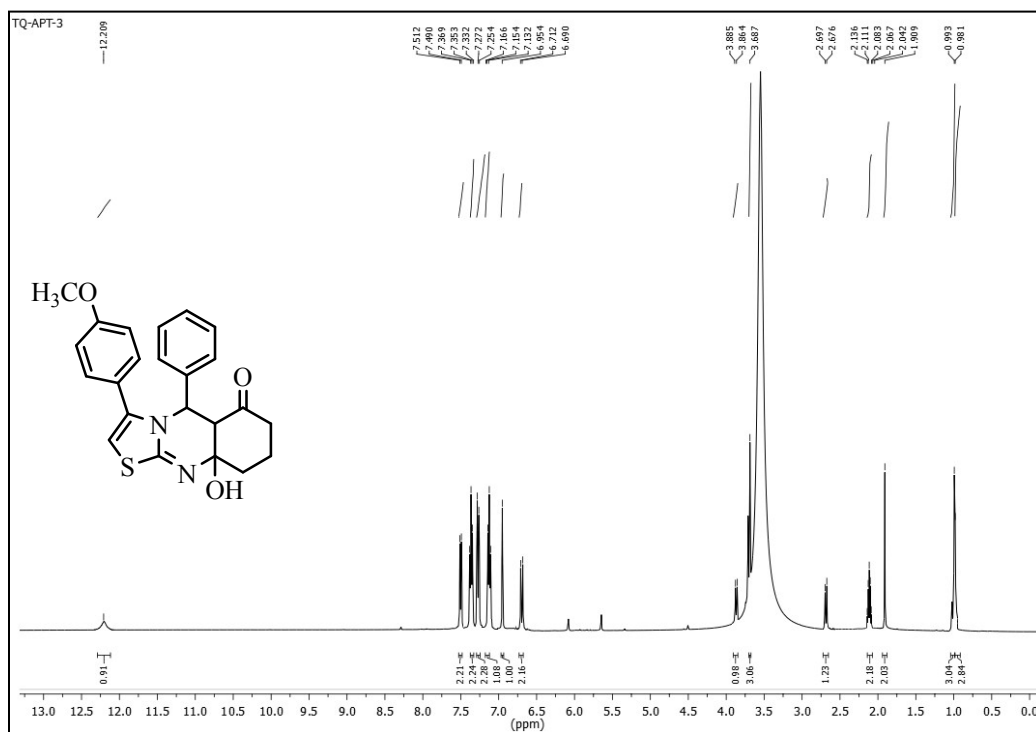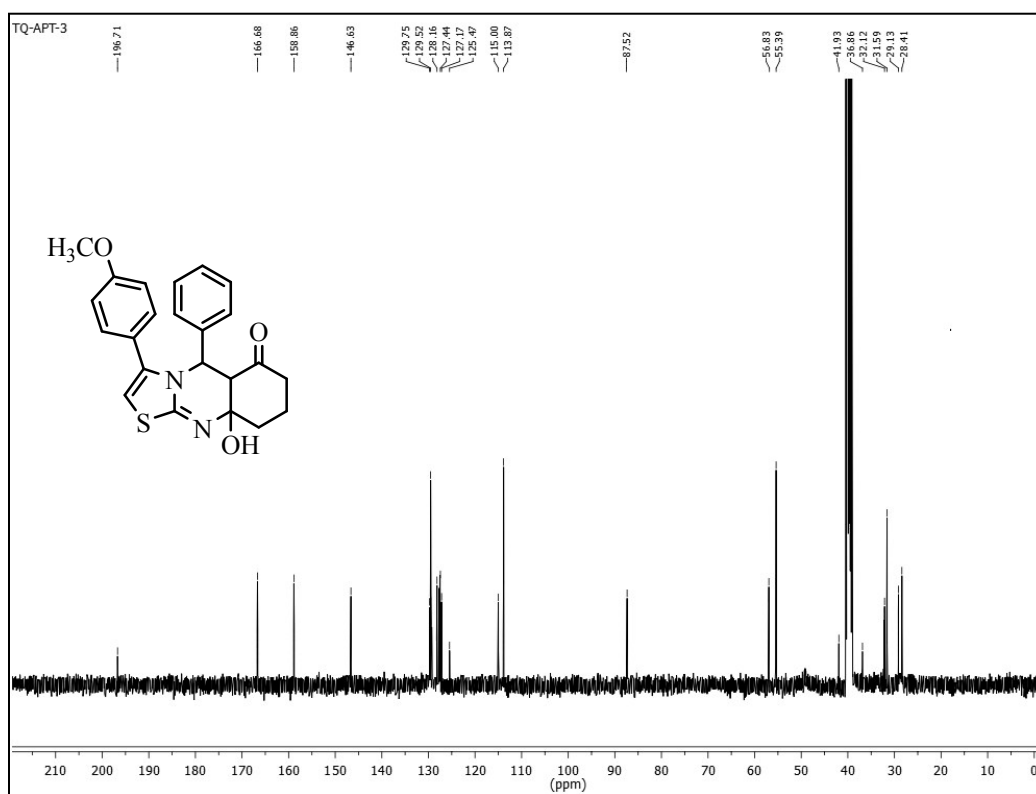

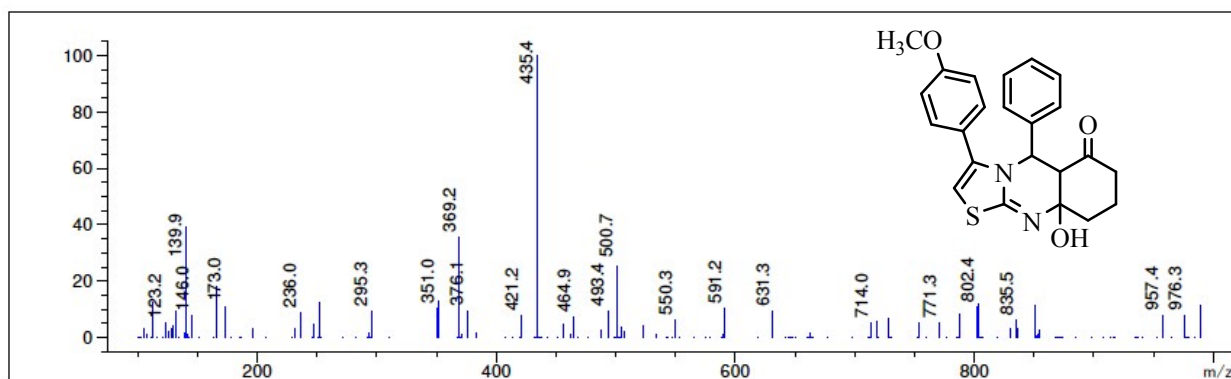

Figure S5. ESI-MS spectrum of 5aa

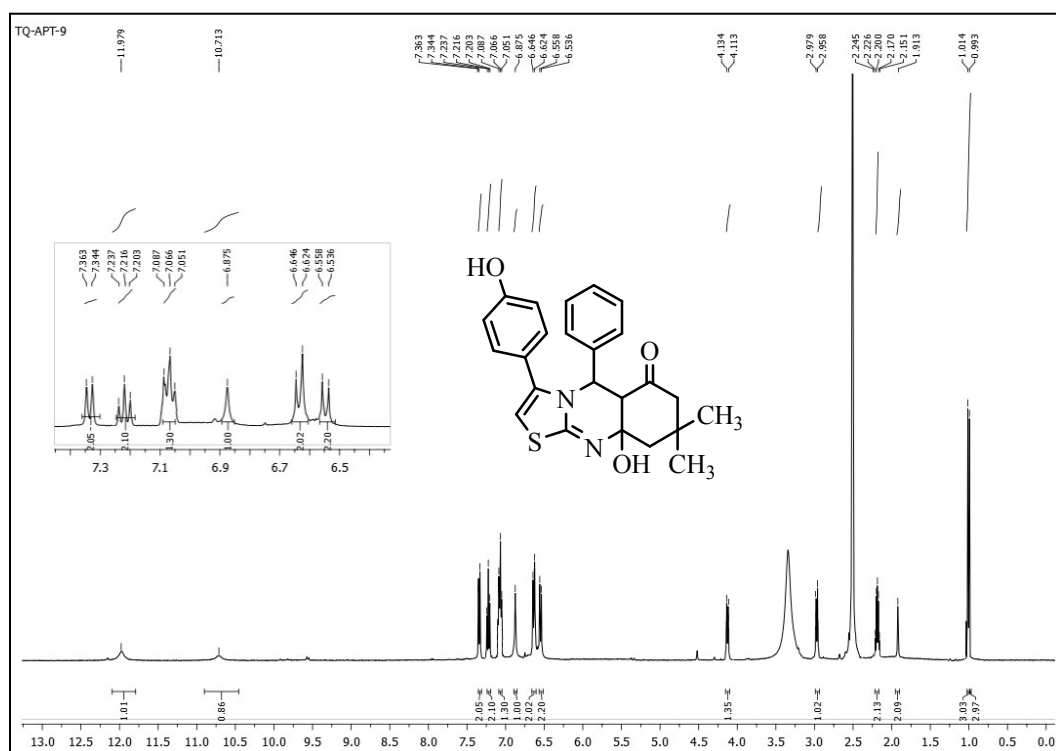

Figure S6. <sup>1</sup>H NMR spectrum of 5ab in DMSO-d<sub>6</sub>

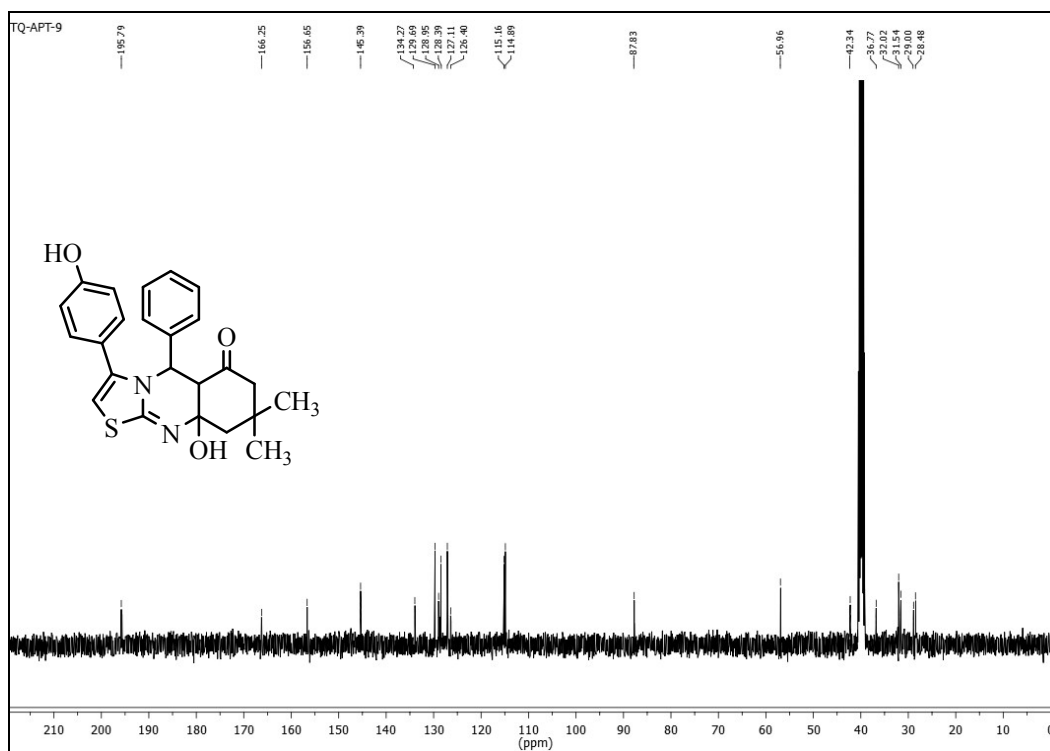

Figure S7. <sup>13</sup>C NMR spectrum of **5ab** in DMSO-d<sub>6</sub>

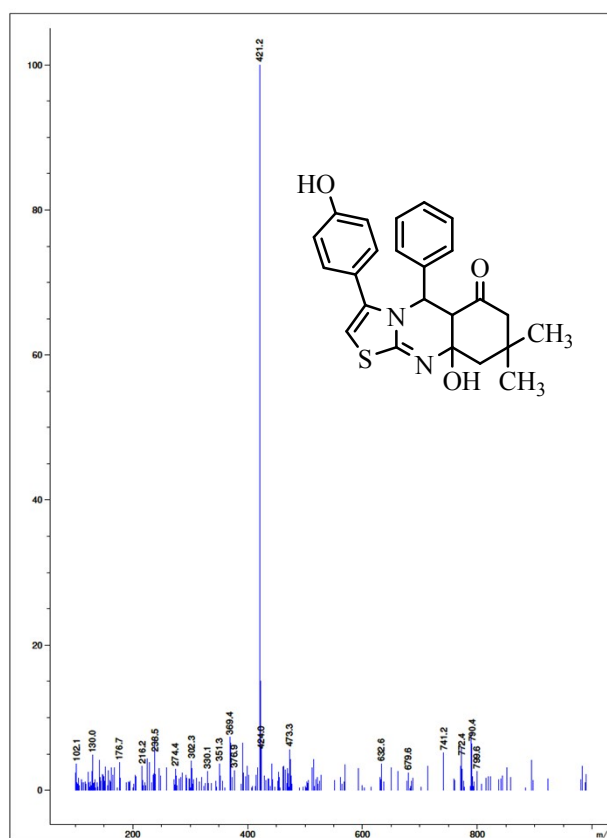

Figure S8. ESI-MS spectrum of **5ab**



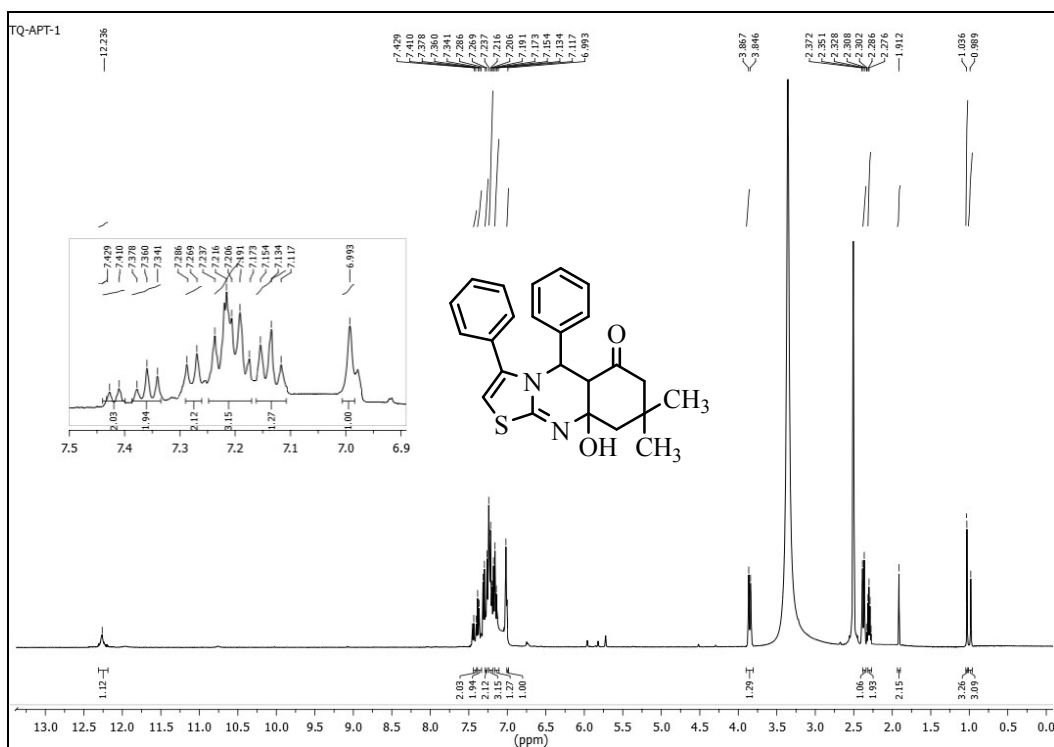

Figure S9.  $^1\text{H}$  NMR spectrum of 5ac in  $\text{DMSO-d}_6$

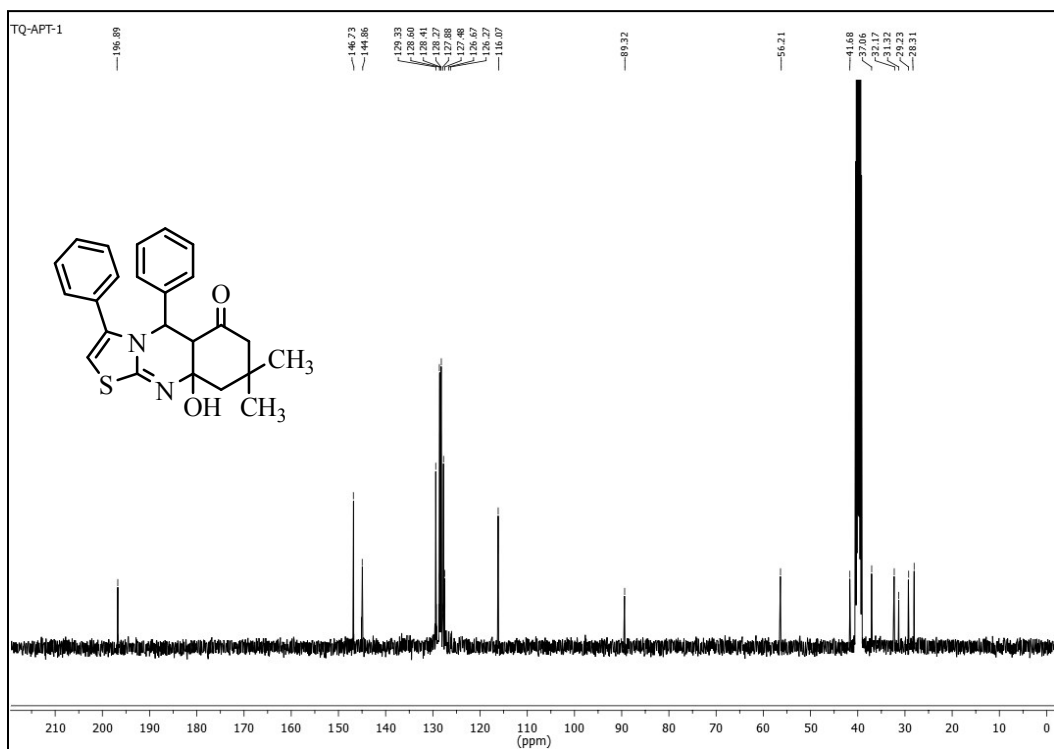

Figure S10.  $^{13}\text{C}$  NMR spectrum of 5ac in  $\text{DMSO-d}_6$

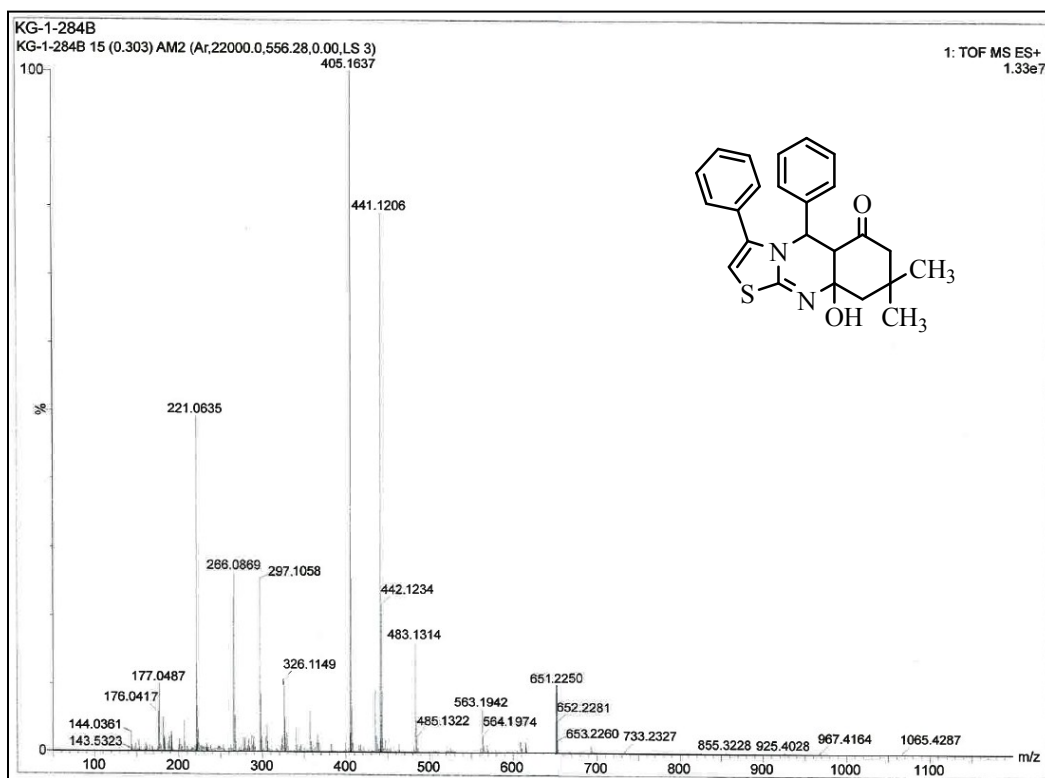

Figure S11. HRMS spectrum of 5ac

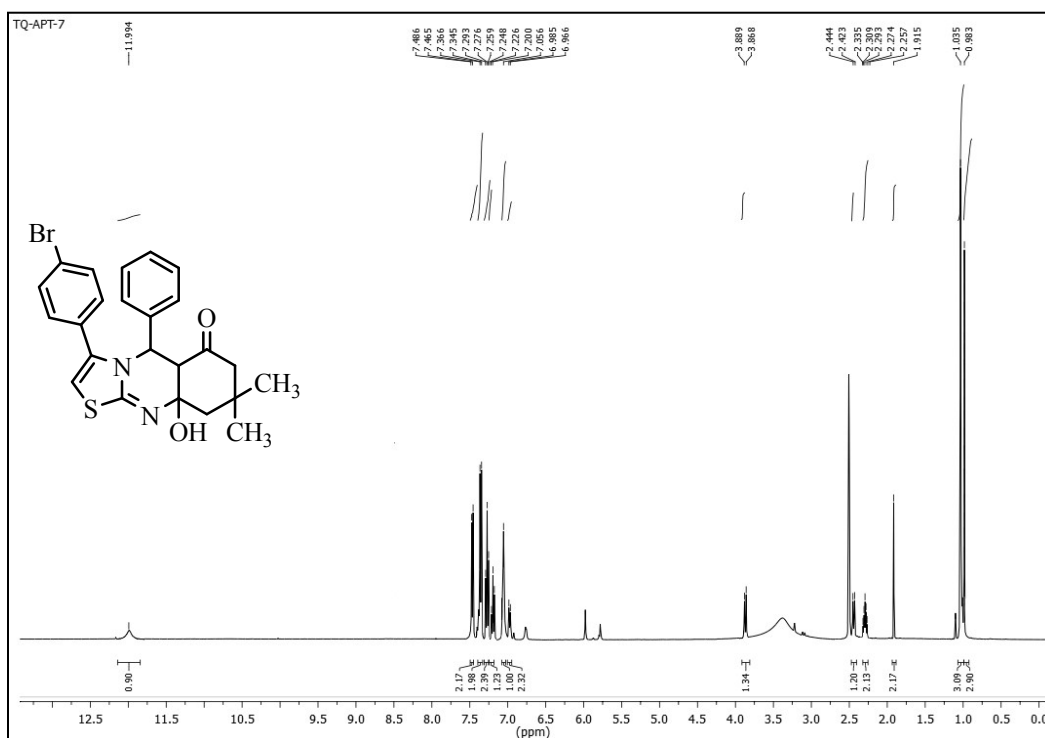

Figure S12. <sup>1</sup>H NMR spectrum of 5ad in DMSO-d<sub>6</sub>

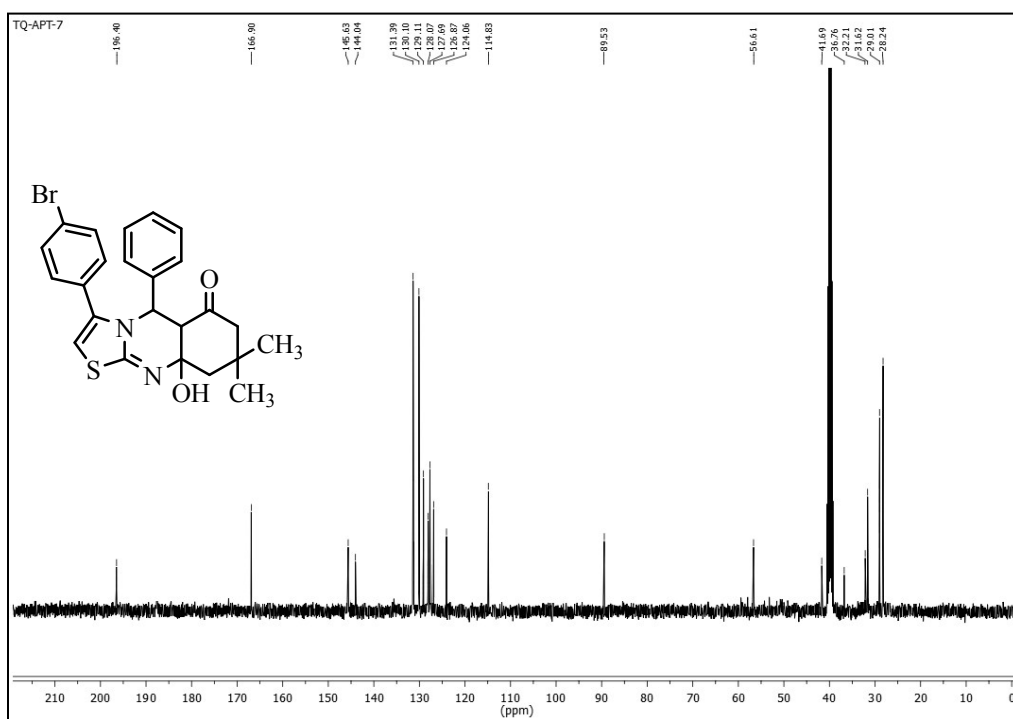

Figure S13. <sup>13</sup>C NMR spectrum of 5ad in DMSO-d<sub>6</sub>

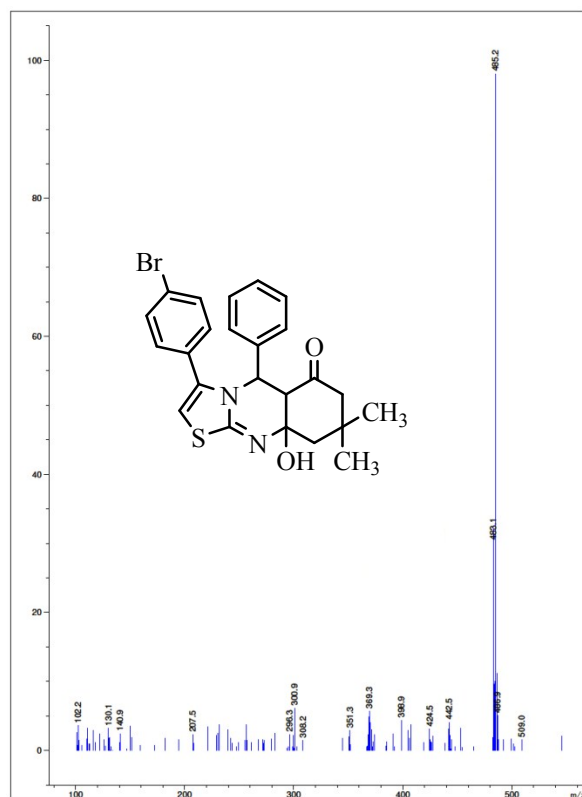

Figure S14. ESI-MS spectrum of 5ad

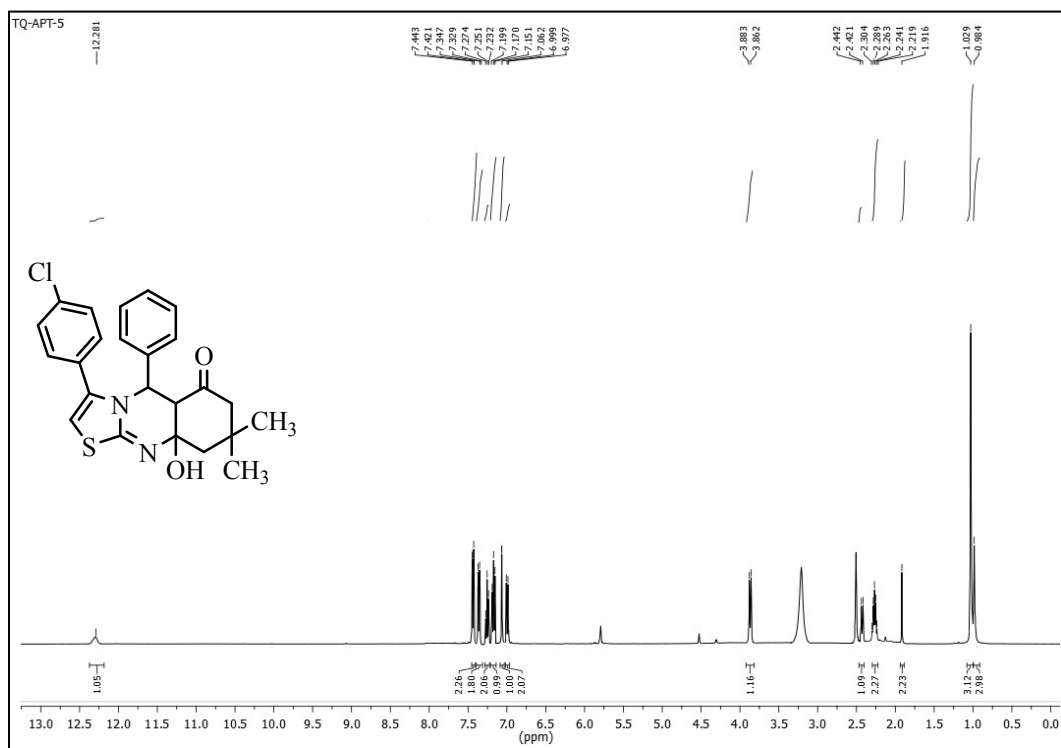

Figure S15.  $^1\text{H}$  NMR spectrum of 5ae in  $\text{DMSO-d}_6$

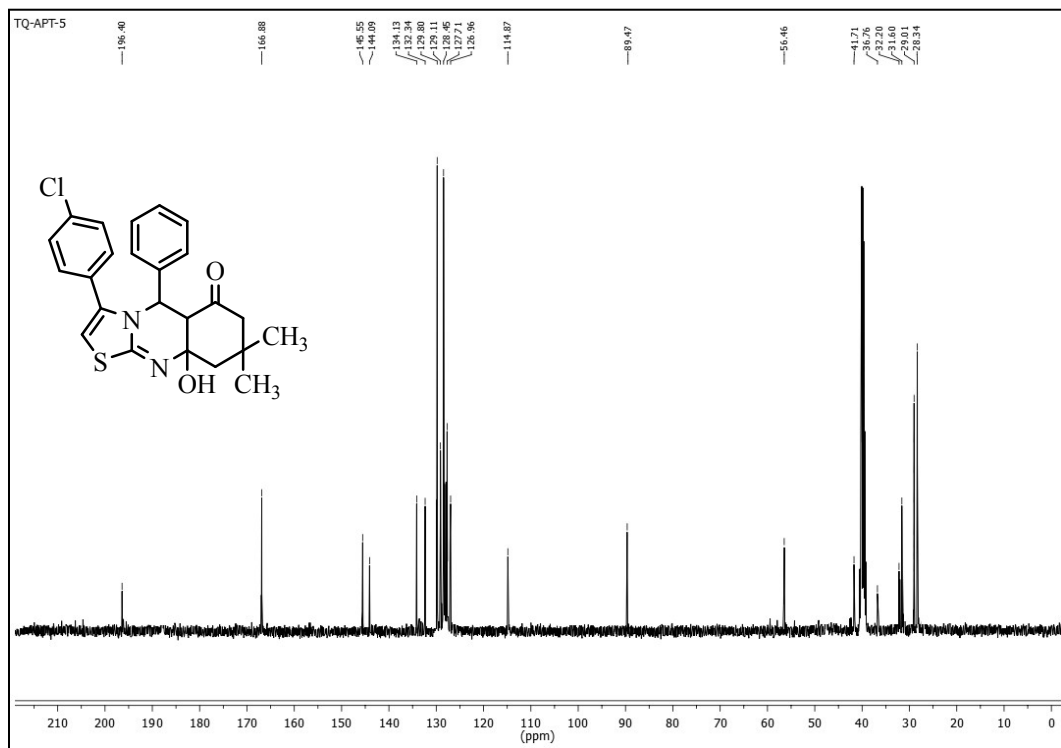

Figure S16.  $^{13}\text{C}$  NMR spectrum of 5ae in  $\text{DMSO-d}_6$

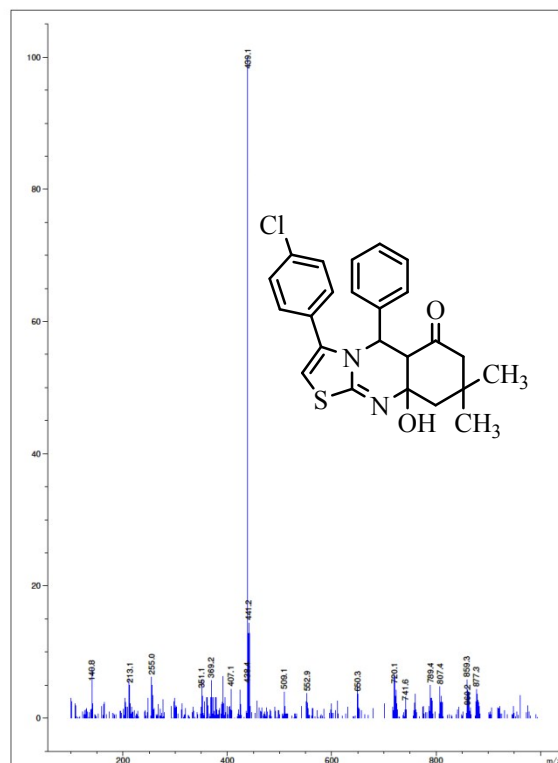

Figure S17. ESI-MS spectrum of 5ae

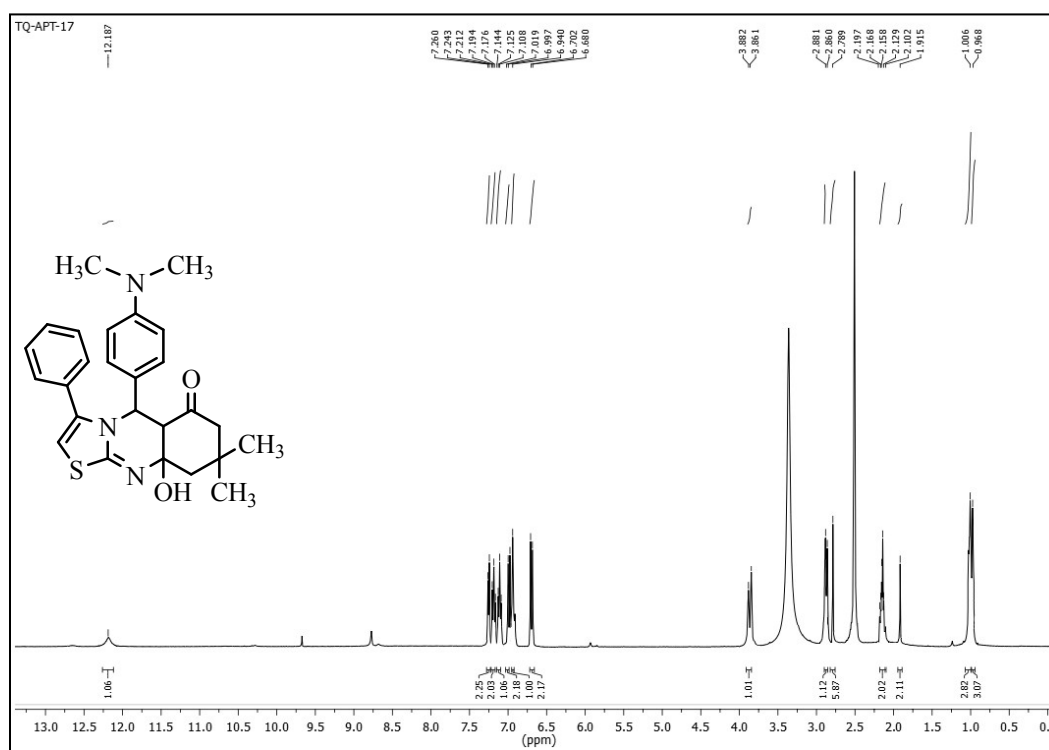

Figure S18.  $^1\text{H}$  NMR spectrum of 5af in  $\text{DMSO-d}_6$

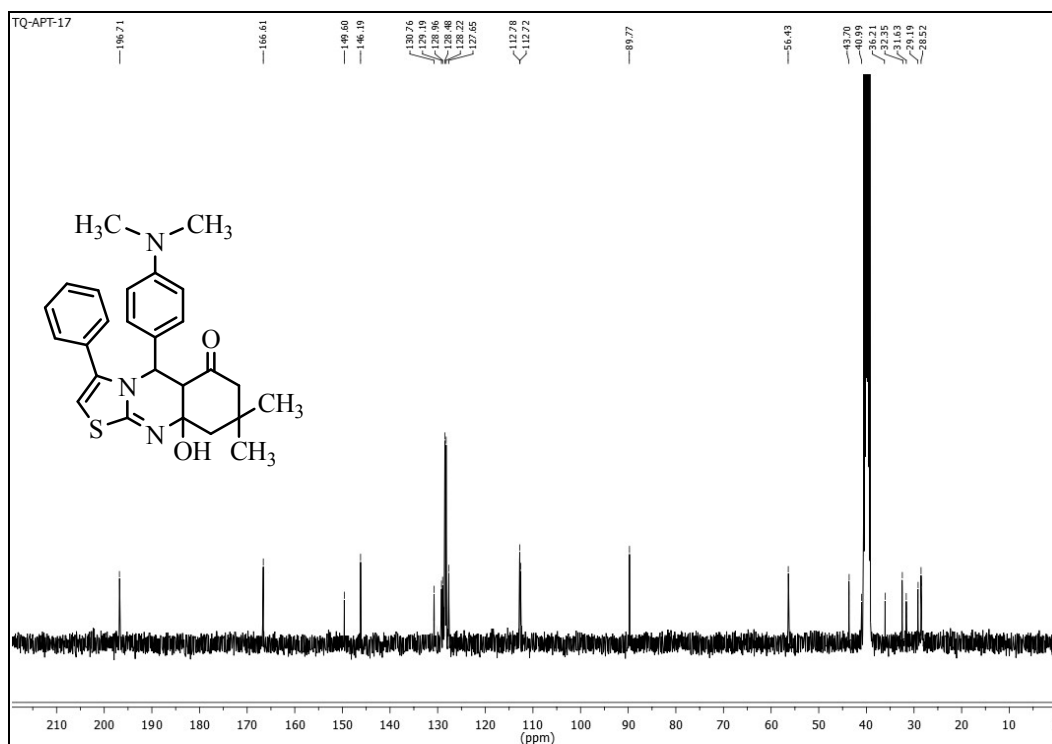

**Figure S19.**  $^{13}\text{C}$  NMR spectrum of **5af** in  $\text{DMSO-d}_6$

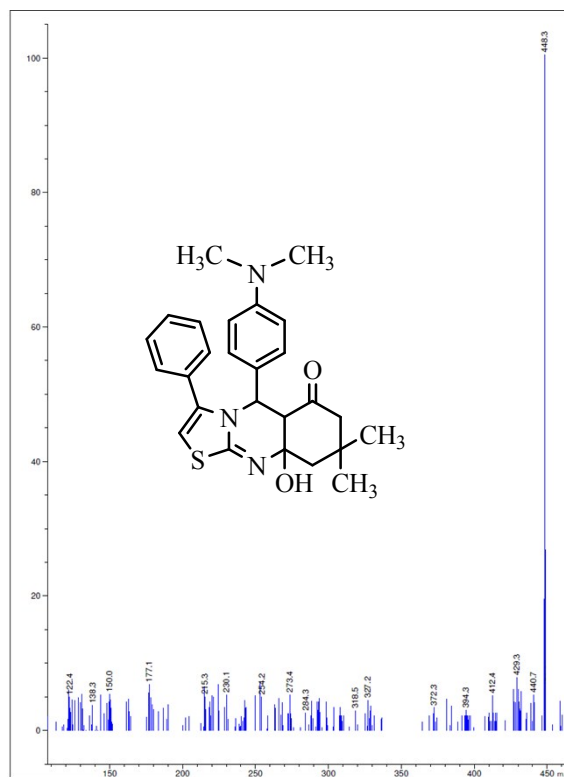

**Figure S20.** ESI-MS spectrum of **5af**

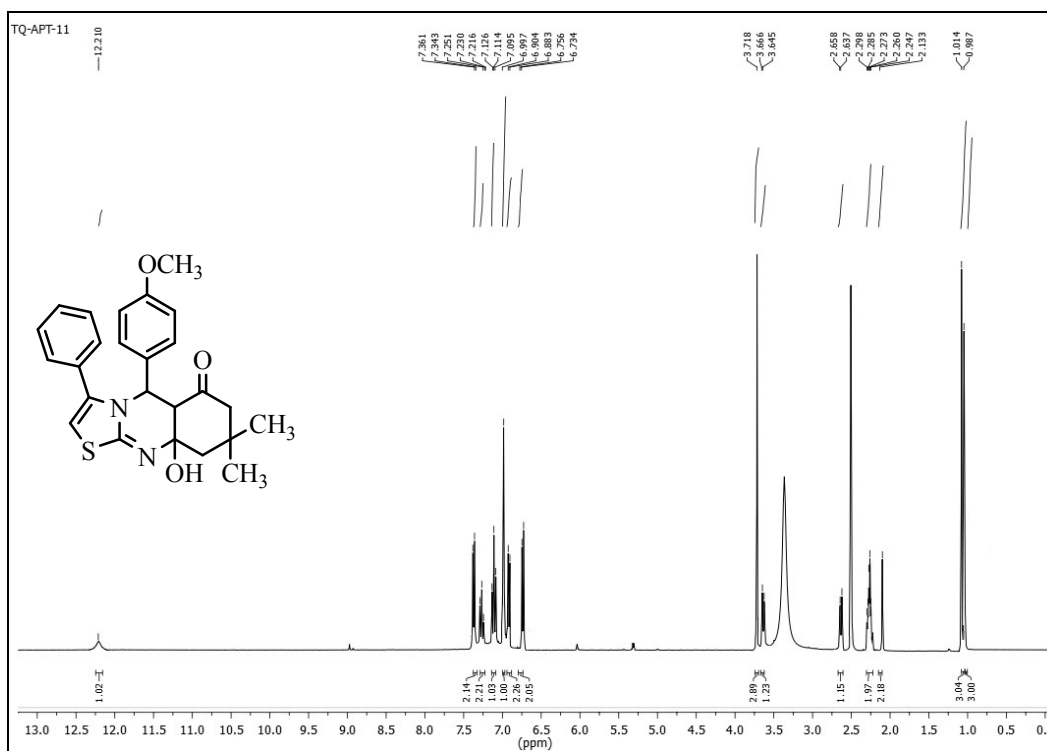

Figure S21.  $^1\text{H}$  NMR spectrum of 5ag in  $\text{DMSO-d}_6$

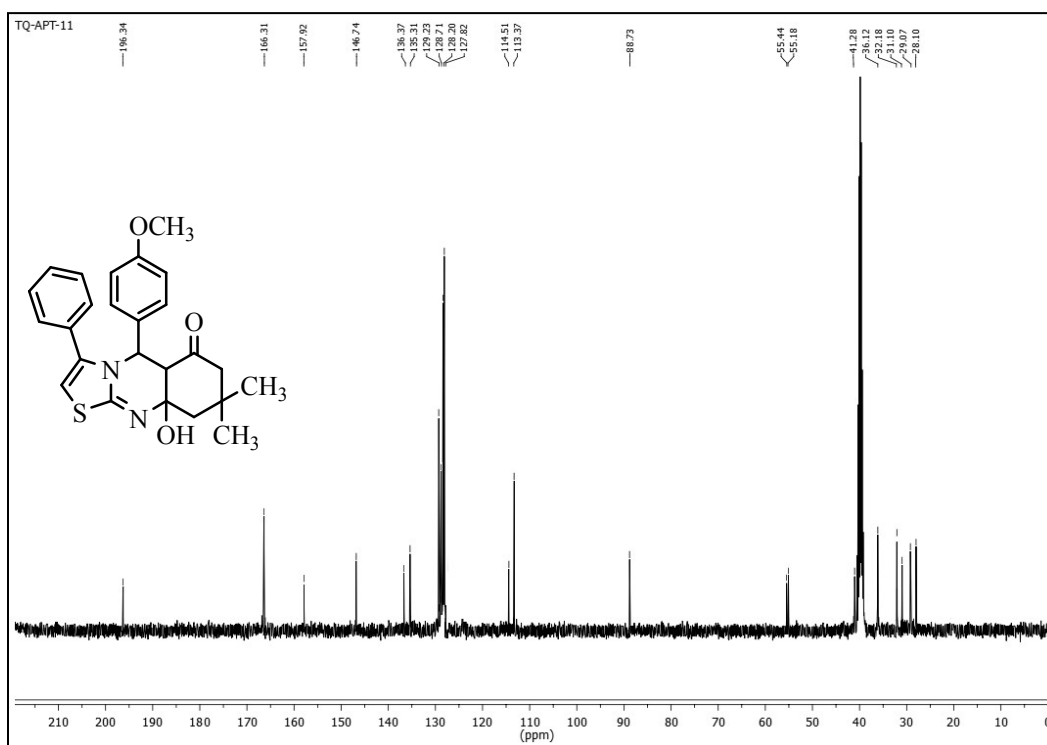

Figure S22.  $^{13}\text{C}$  NMR spectrum of 5ag in  $\text{DMSO-d}_6$

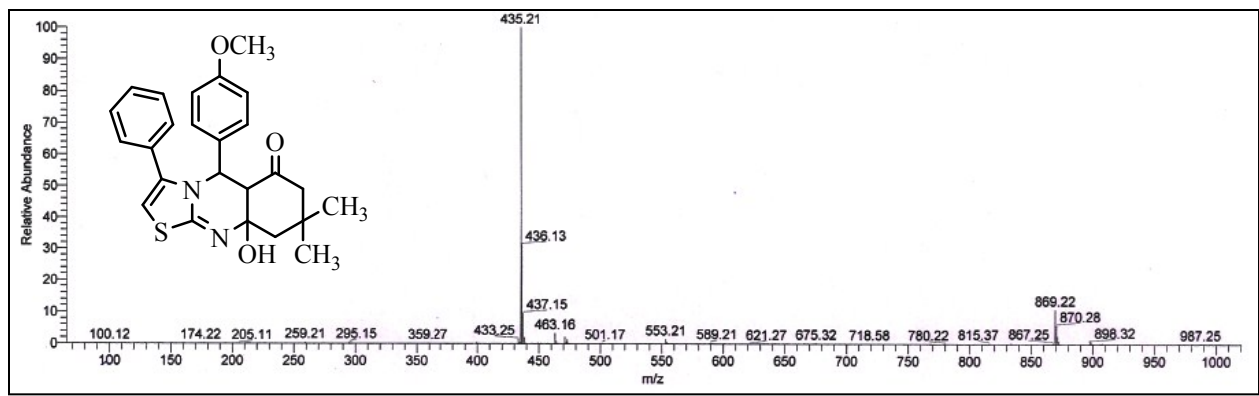

Figure S23. ESI-MS spectrum of 5ag

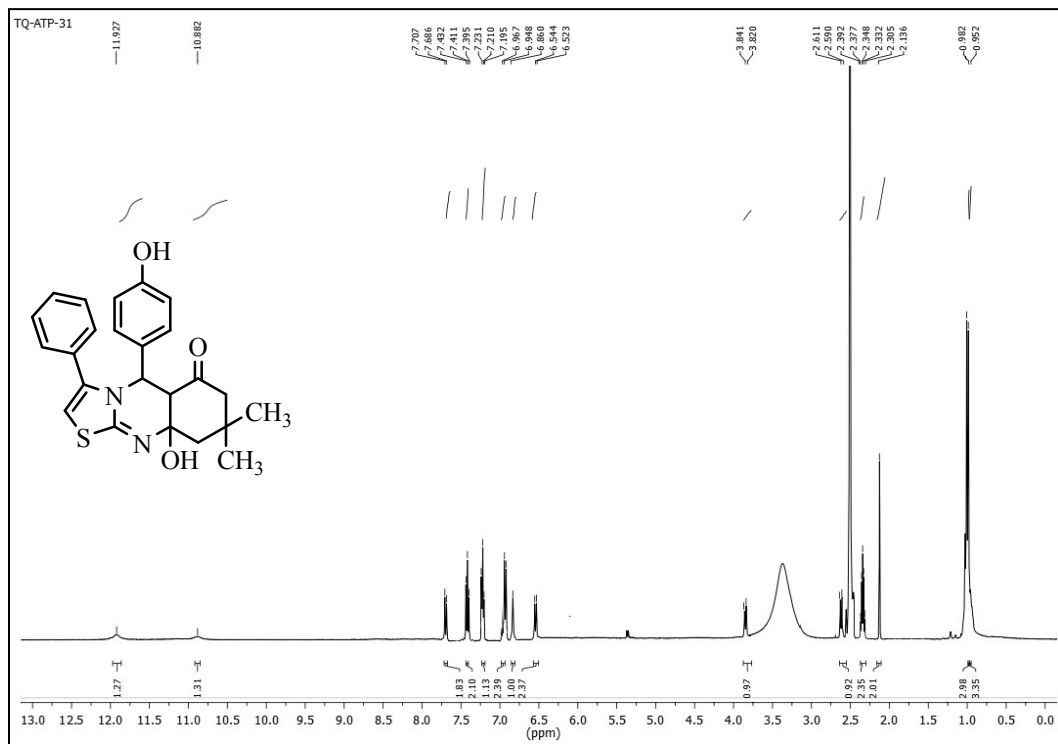

Figure S24. <sup>1</sup>H NMR spectrum of 5ah in DMSO-d<sub>6</sub>



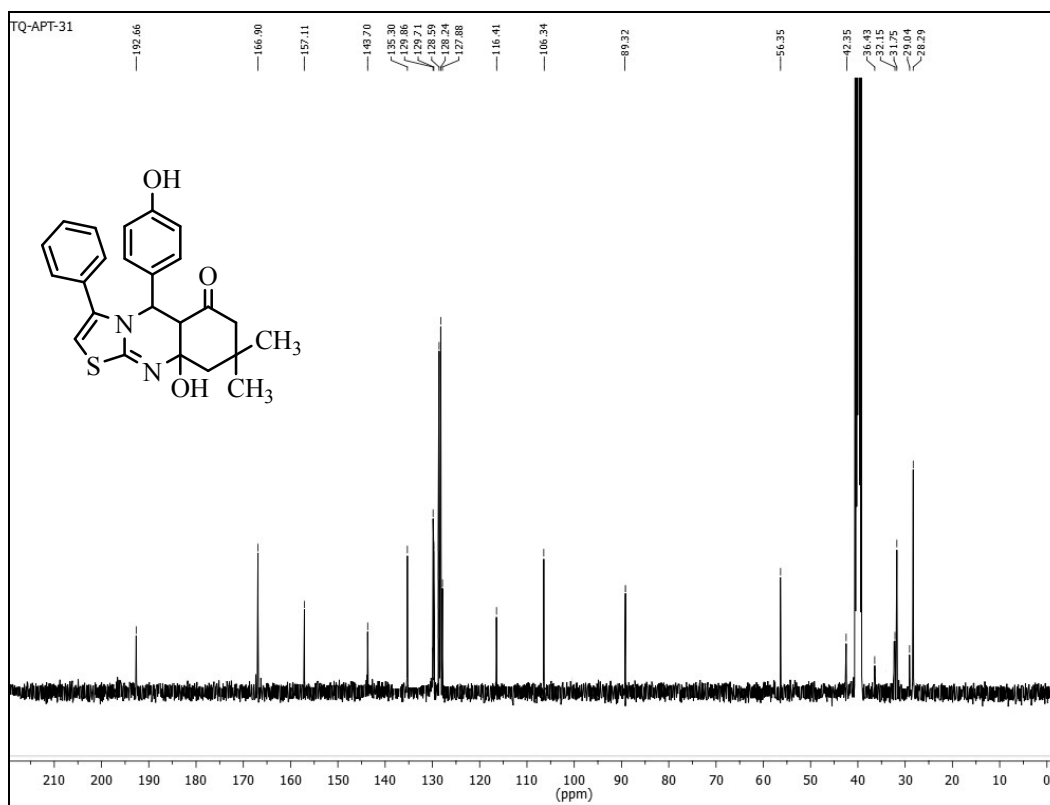

Figure S25.  $^{13}\text{C}$  NMR spectrum of 5ah in  $\text{DMSO-d}_6$

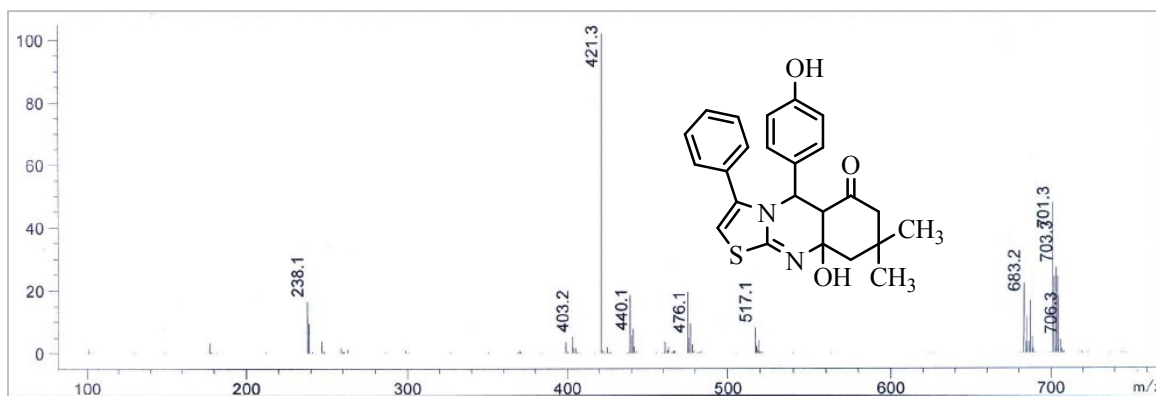

Figure S26. LC-MS spectrum of 5ah

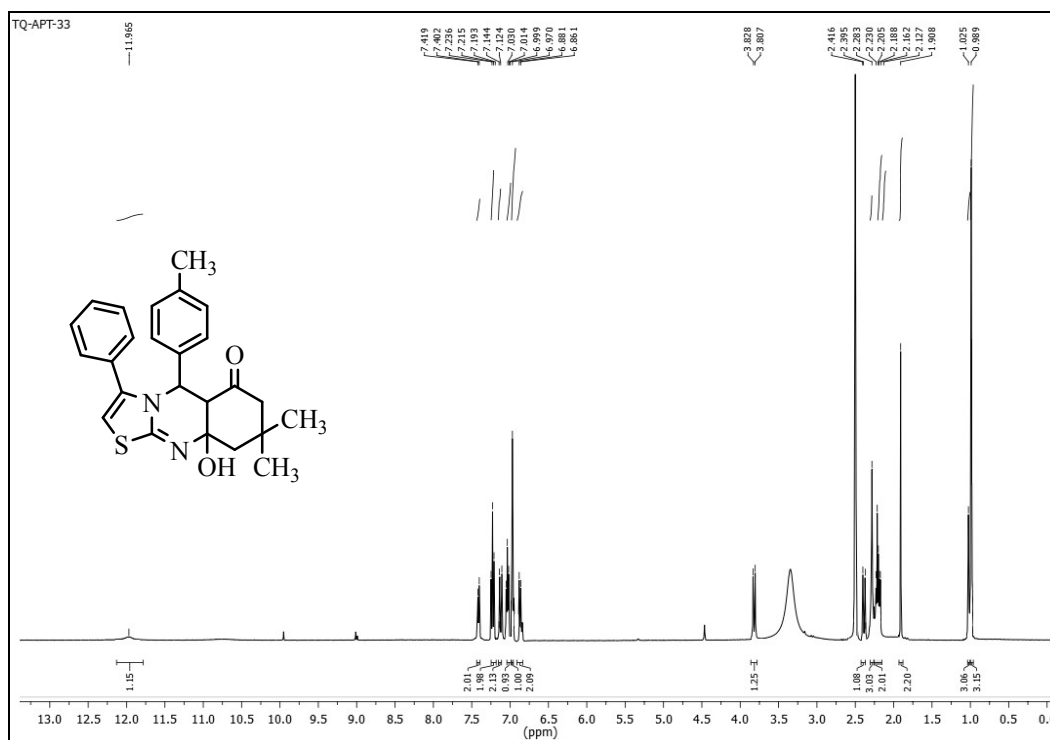

Figure S27.  $^1\text{H}$  NMR spectrum of 5ai in  $\text{DMSO-d}_6$

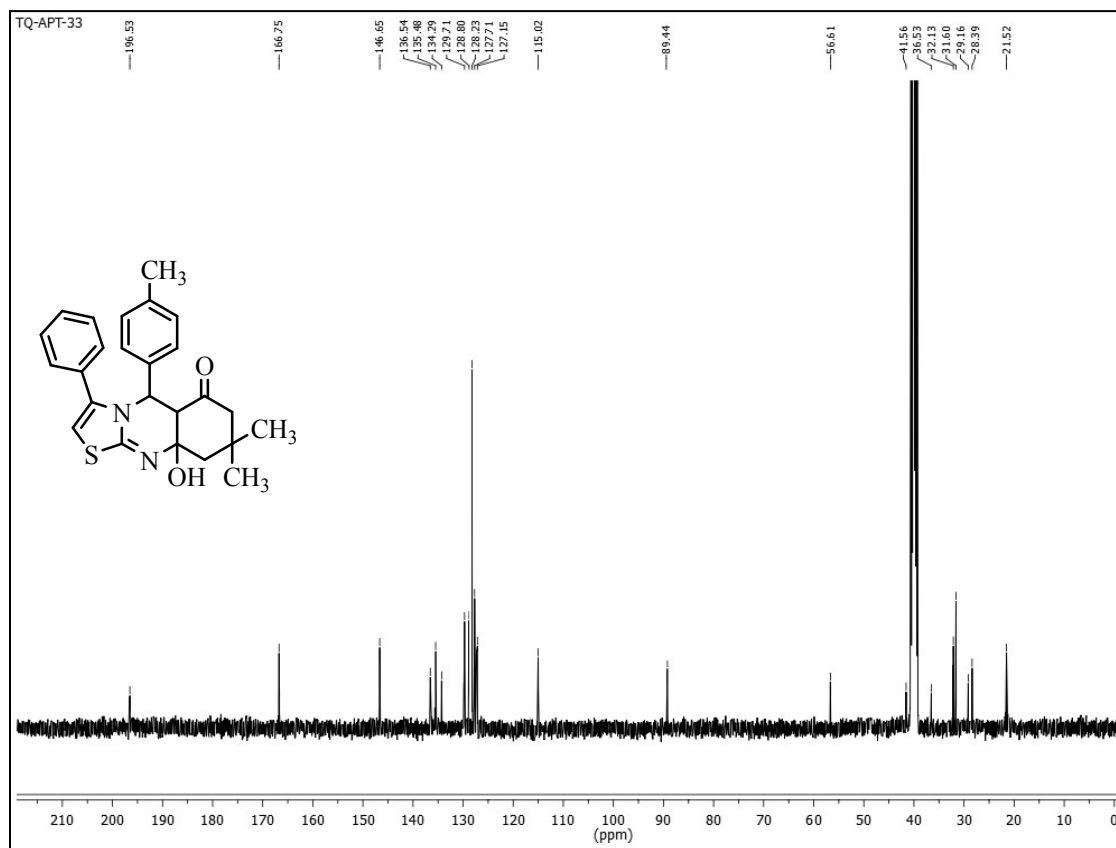

Figure S28.  $^{13}\text{C}$  NMR spectrum of 5ai in  $\text{DMSO-d}_6$

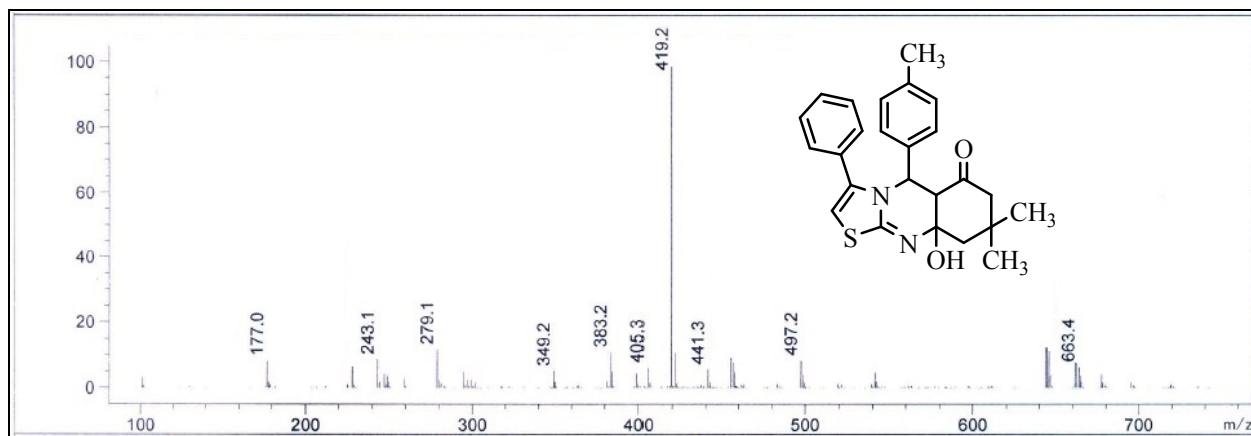

Figure S29. LC-MS spectrum of 5ai

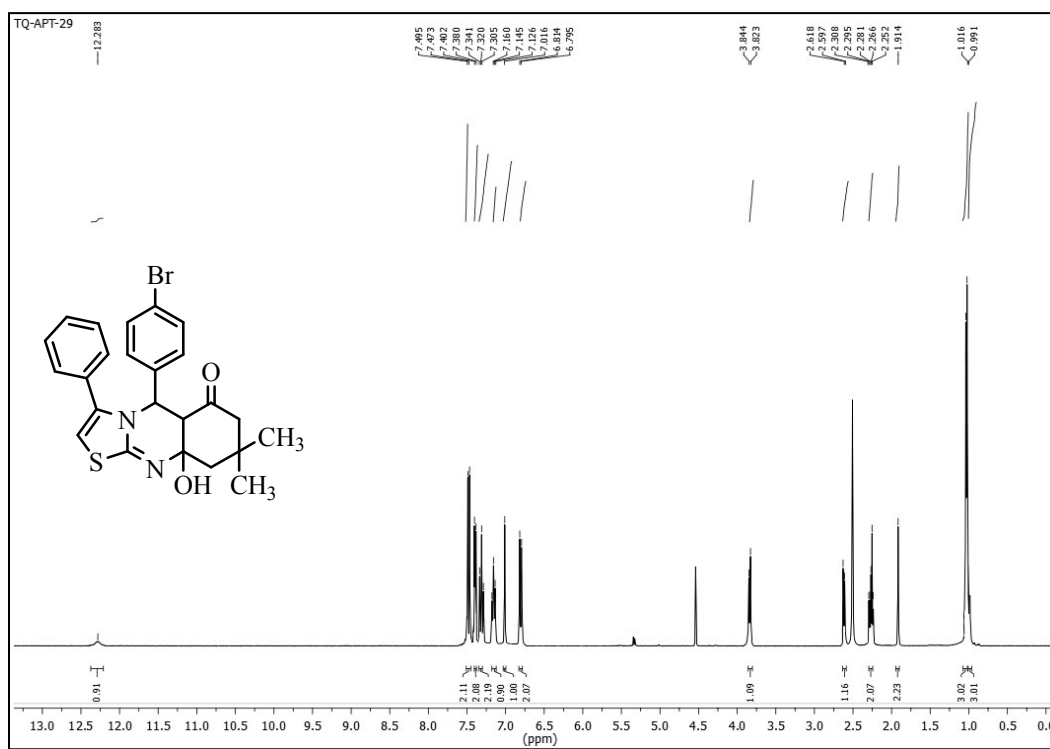

Figure S30. <sup>1</sup>H NMR spectrum of 5aj in DMSO-d<sub>6</sub>

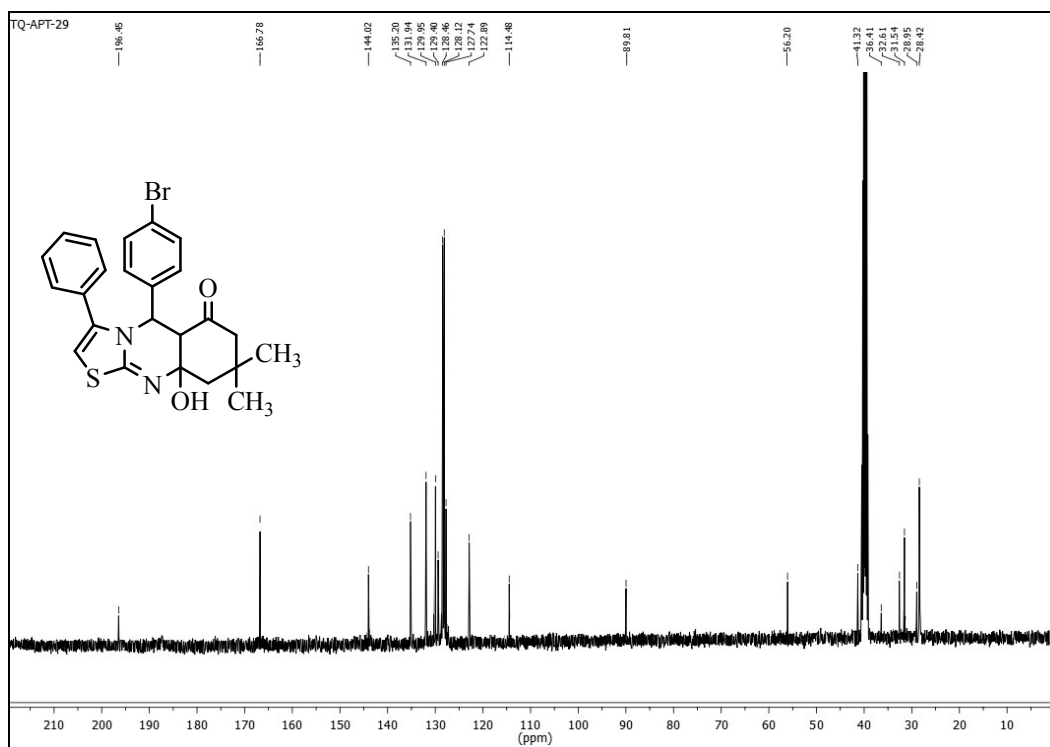

Figure S31.  $^{13}\text{C}$  NMR spectrum of 5aj in  $\text{DMSO-d}_6$

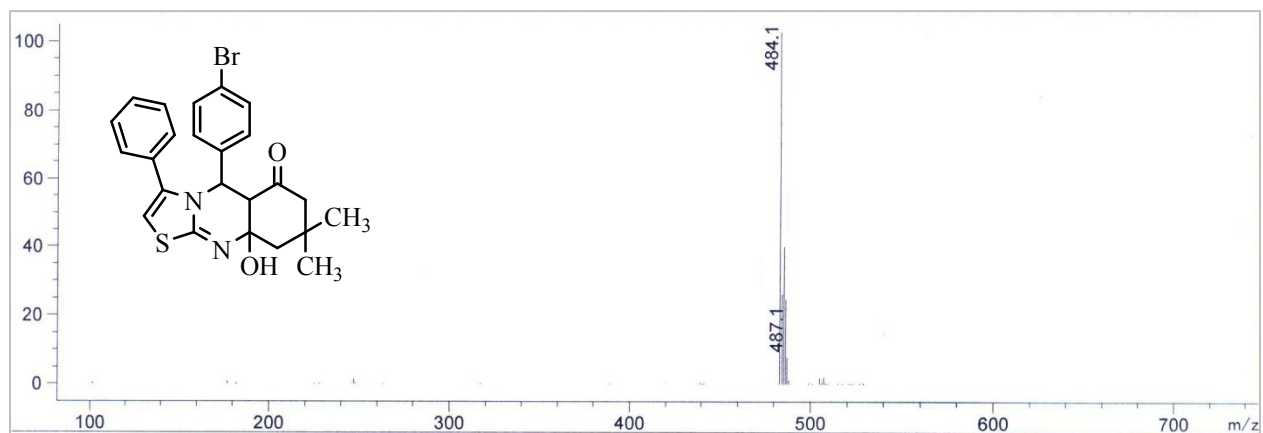

Figure S32. LC-MS spectrum of 5aj

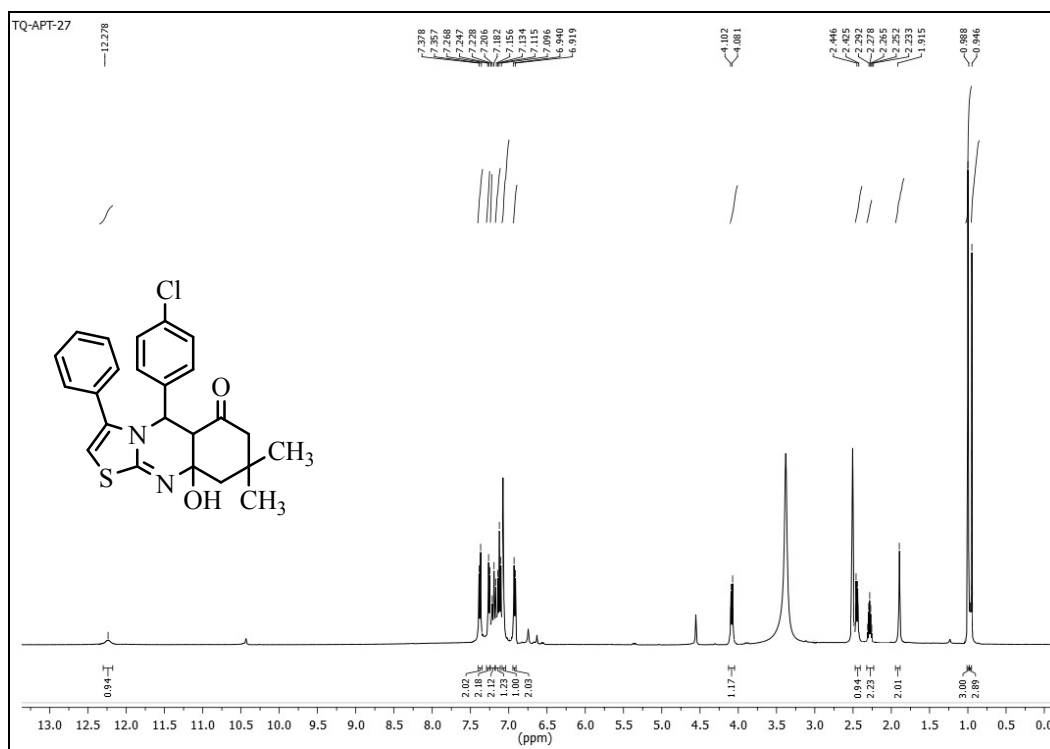

Figure S33.  $^1\text{H}$  NMR spectrum of 5ak in  $\text{DMSO-d}_6$

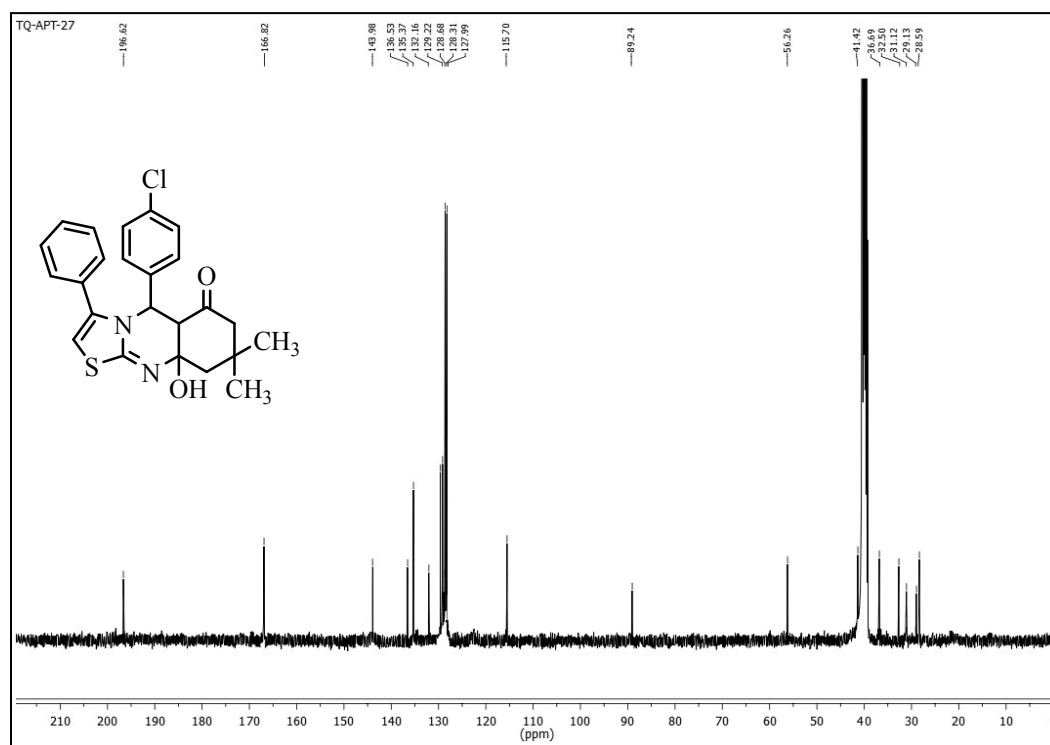

Figure S34.  $^{13}\text{C}$  NMR spectrum of 5ak in  $\text{DMSO-d}_6$

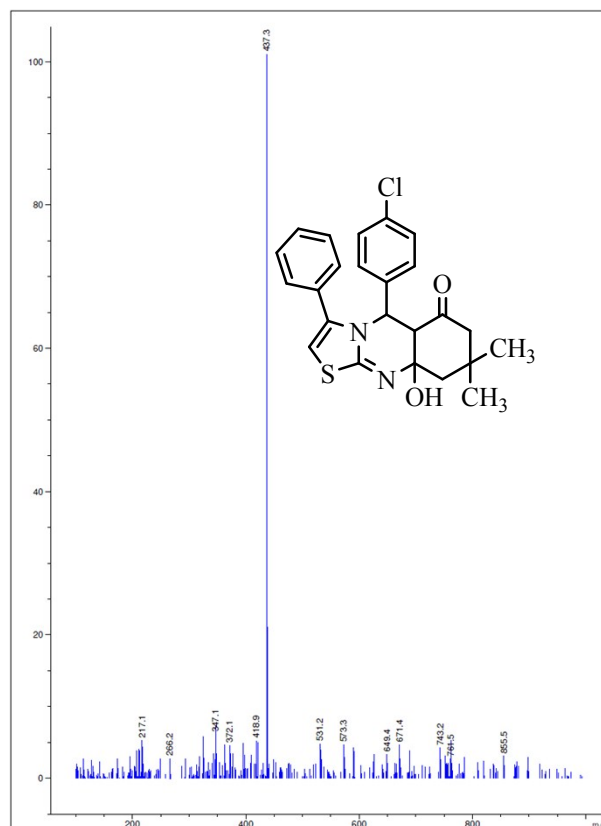

Figure S35. ESI-MS spectrum of 5ak

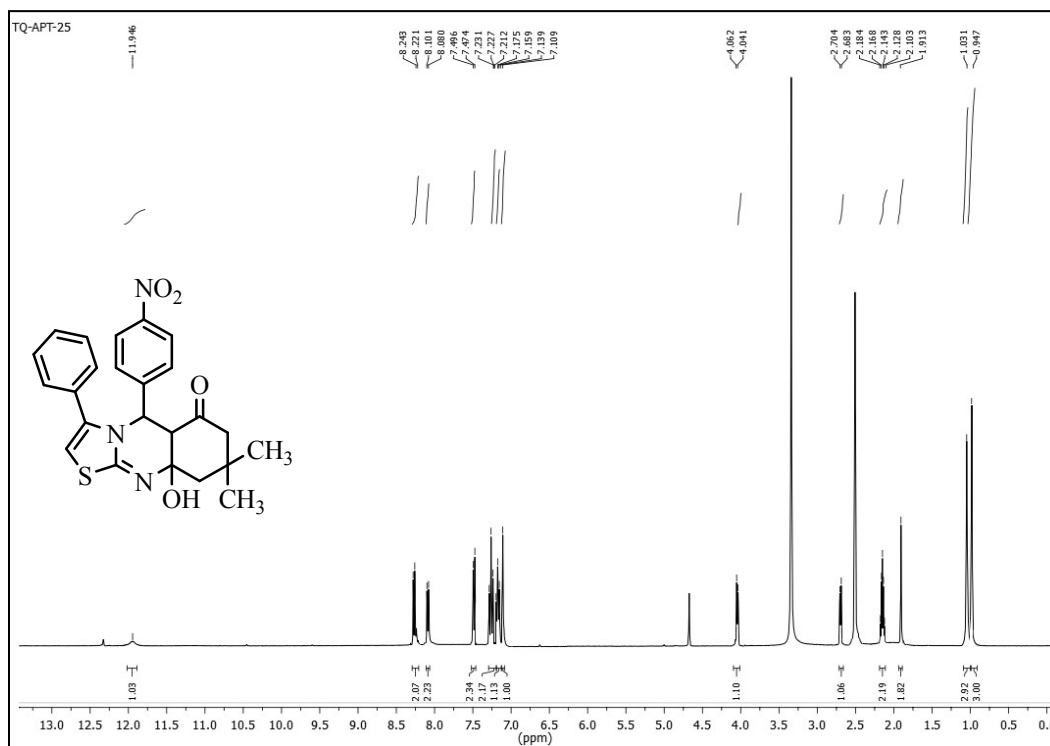

Figure S36. <sup>1</sup>H NMR spectrum of 5al in DMSO-d<sub>6</sub>

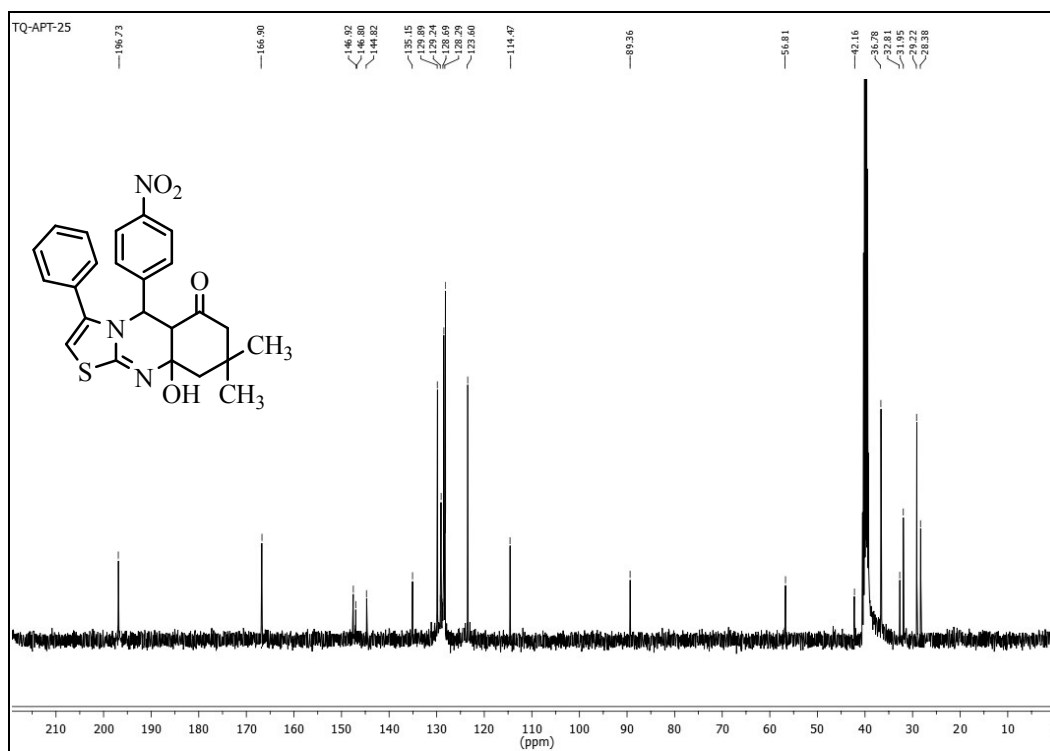

**Figure S37.**  $^{13}\text{C}$  NMR spectrum of **5al** in  $\text{DMSO-d}_6$

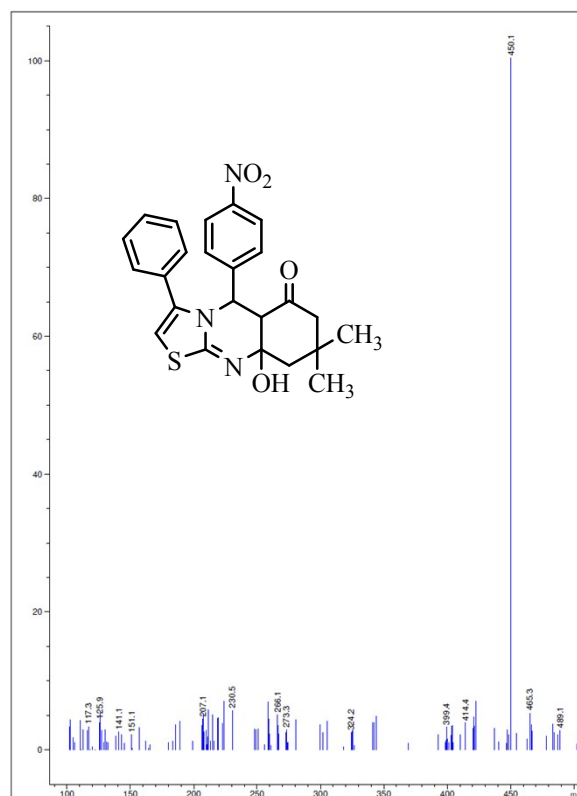

**Figure S38.** ESI-MS spectrum of **5al**

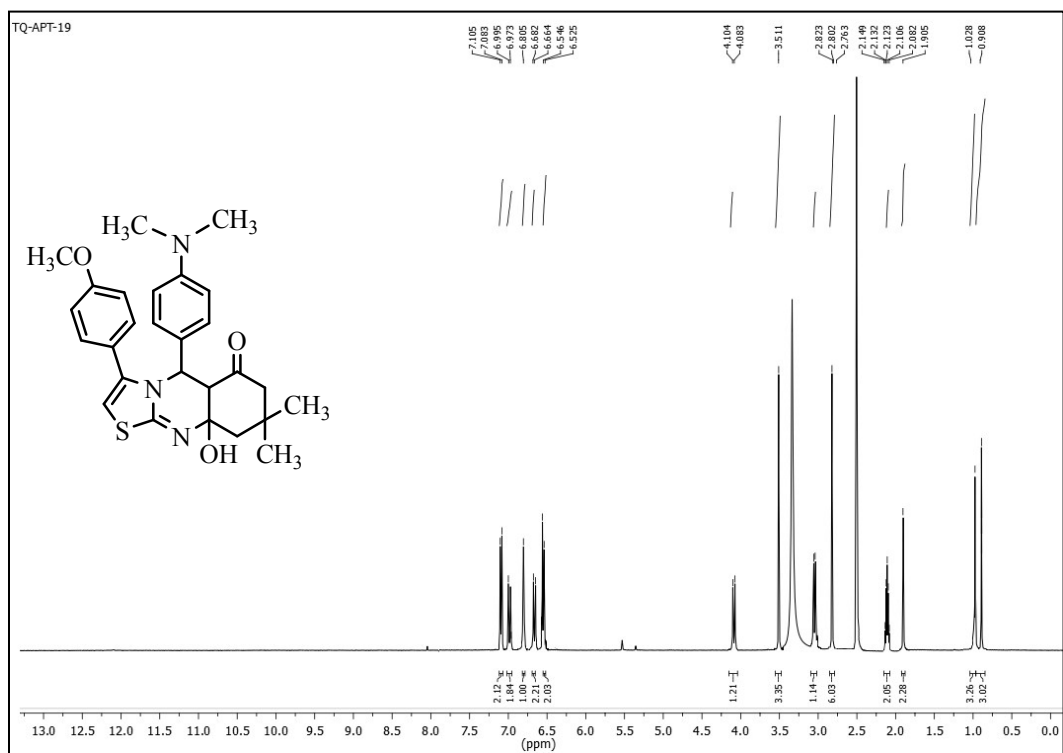

Figure S39.  $^1\text{H}$  NMR spectrum of **5am** in  $\text{DMSO-d}_6$

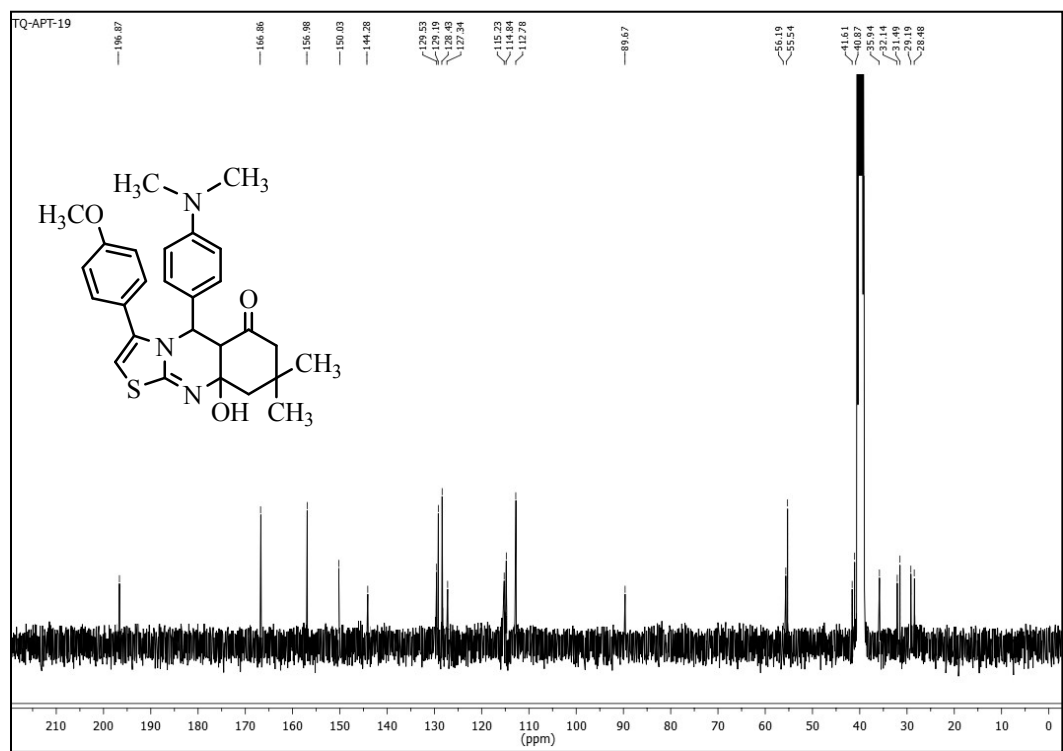

Figure S40.  $^{13}\text{C}$  NMR spectrum of **5am** in  $\text{DMSO-d}_6$



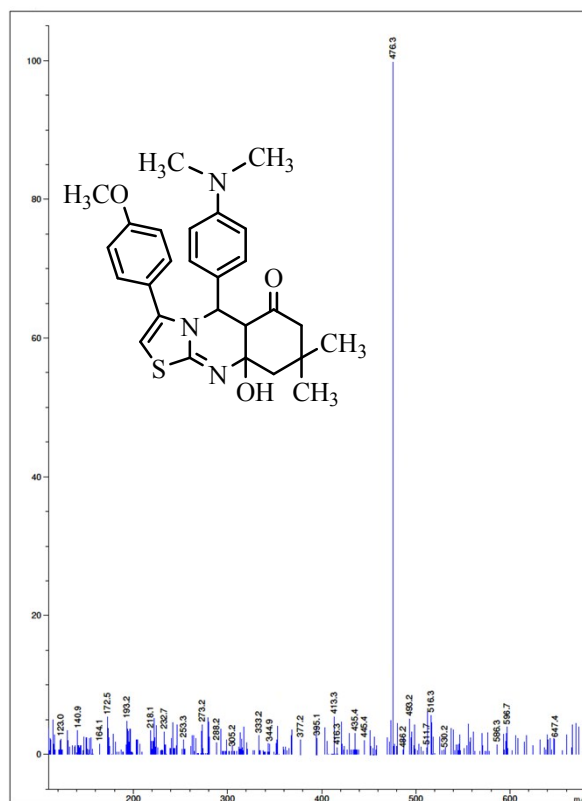

Figure S41. ESI-MS spectrum of 5am

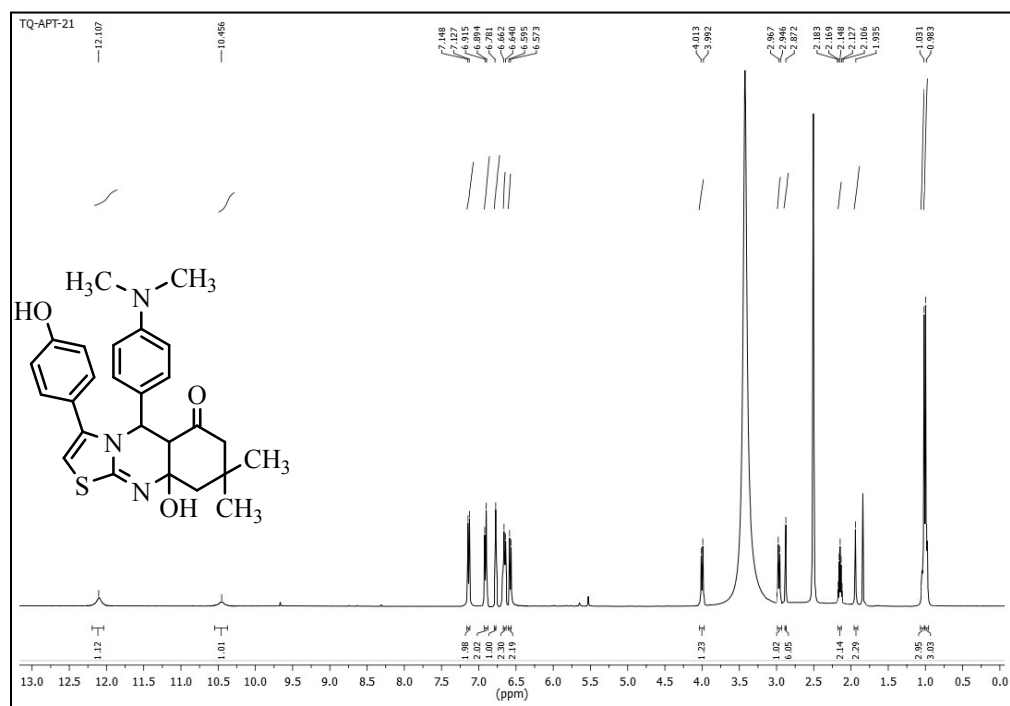

Figure S42. <sup>1</sup>H NMR spectrum of 5am in DMSO-d<sub>6</sub>

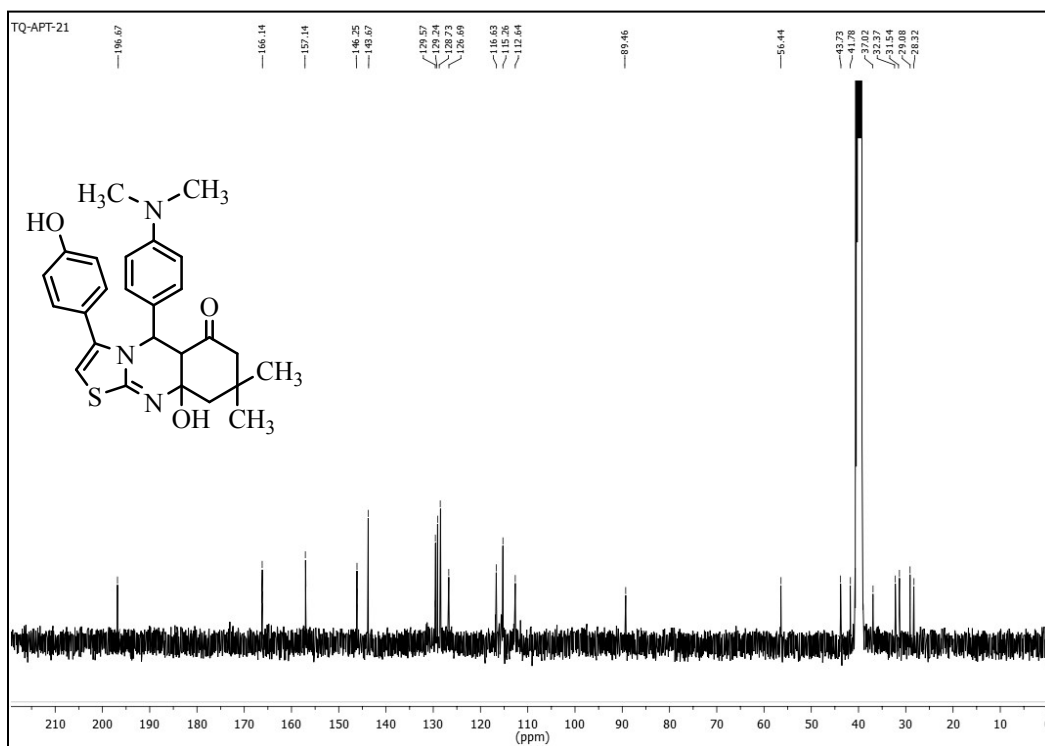

Figure S43.  $^{13}\text{C}$  NMR spectrum of 5an in  $\text{DMSO-d}_6$

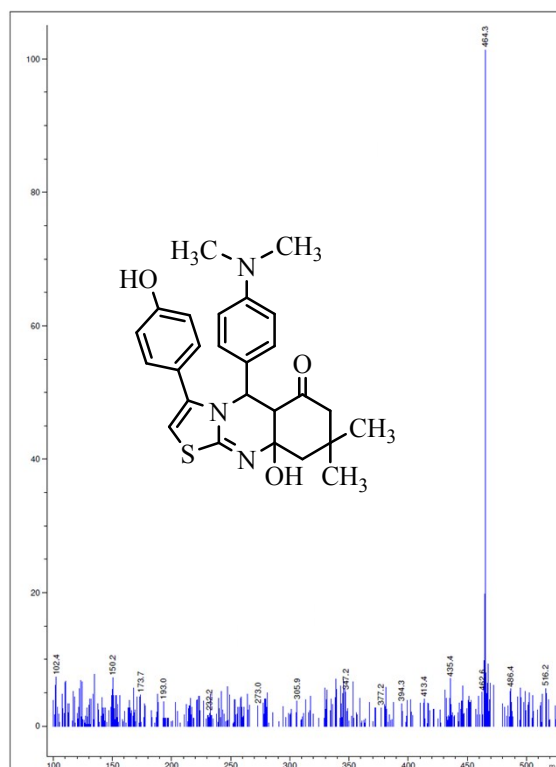

Figure S44. ESI-MS spectrum of 5an

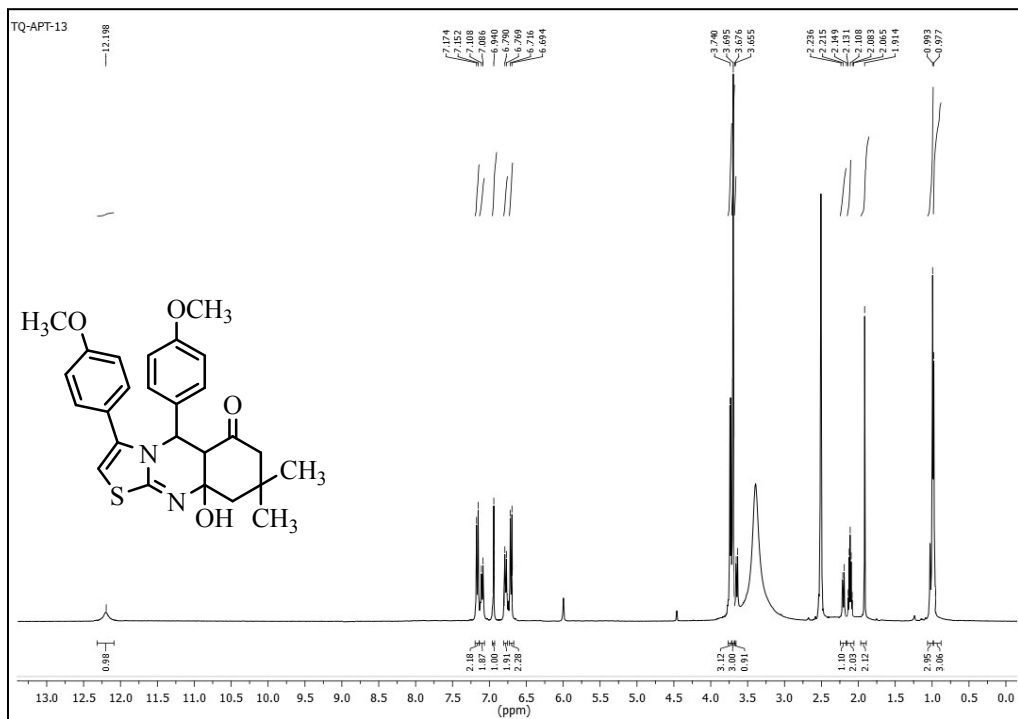

Figure S45.  $^1\text{H}$  NMR spectrum of **5ao** in  $\text{DMSO-d}_6$

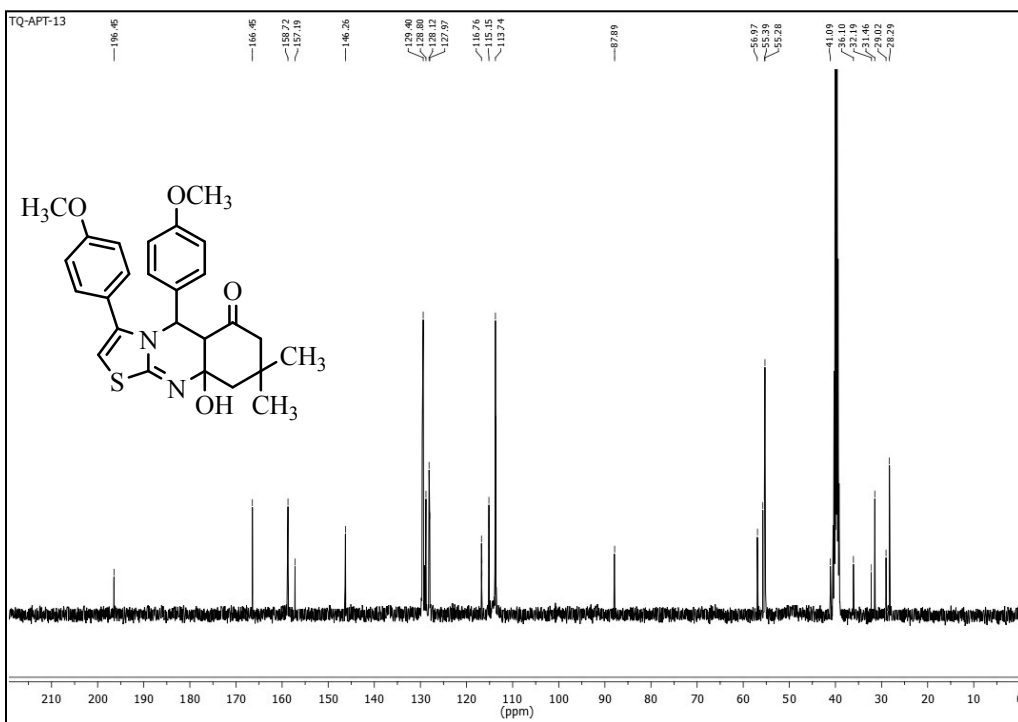

Figure S46.  $^{13}\text{C}$  NMR spectrum of **5ao** in  $\text{DMSO-d}_6$

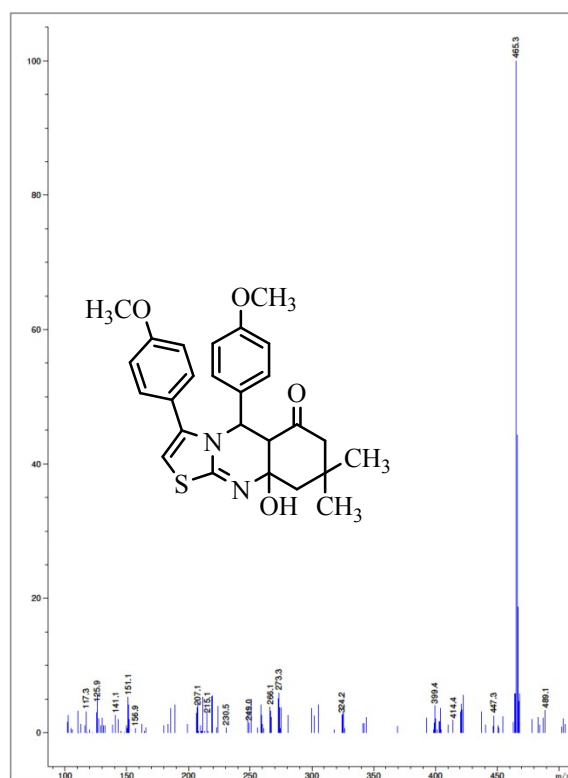

Figure S47. ESI-MS spectrum of 5ao

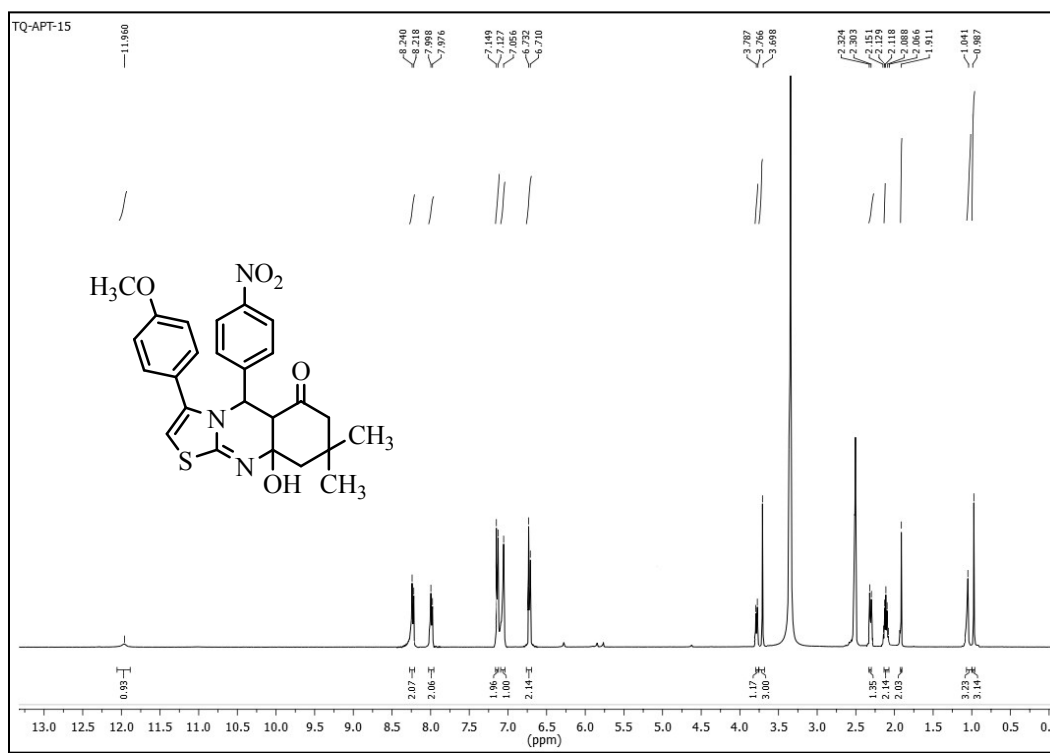

Figure S48. <sup>1</sup>H NMR spectrum of 5ap in DMSO-d<sub>6</sub>

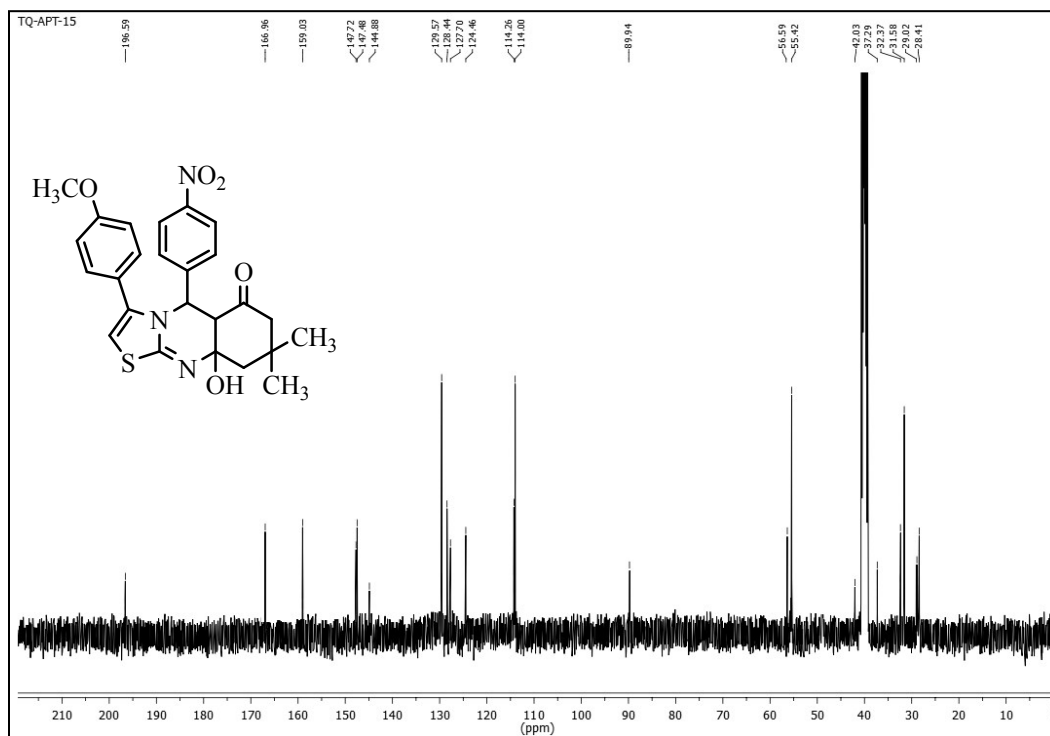

**Figure S49.**  $^{13}\text{C}$  NMR spectrum of **5ap** in  $\text{DMSO-d}_6$

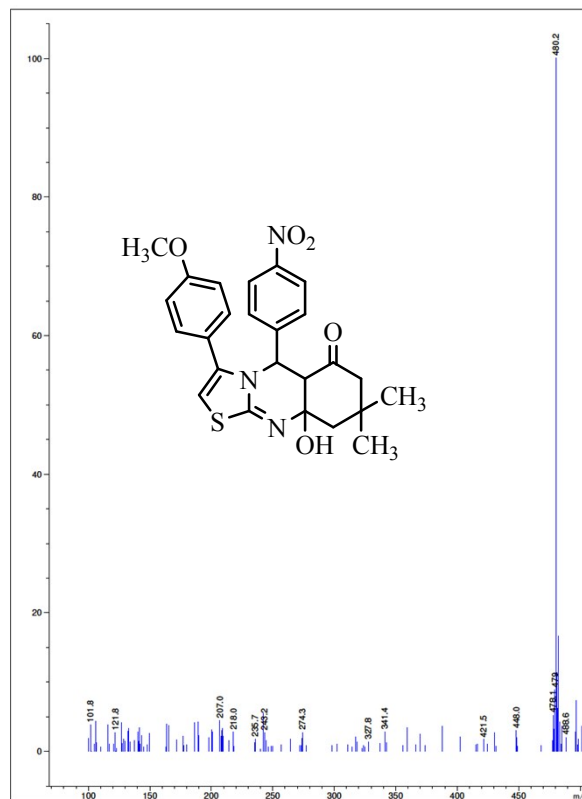

Figure S50. ESI-MS spectrum of **5ap**

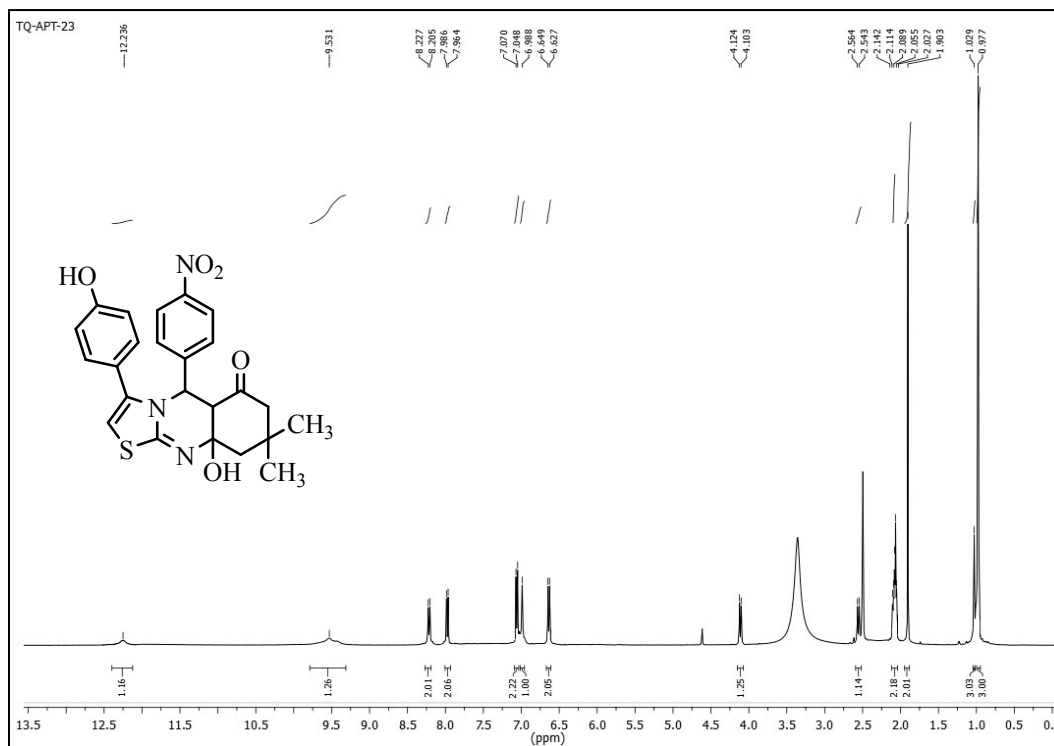

Figure S51.  $^1\text{H}$  NMR spectrum of **5aq** in  $\text{DMSO-d}_6$

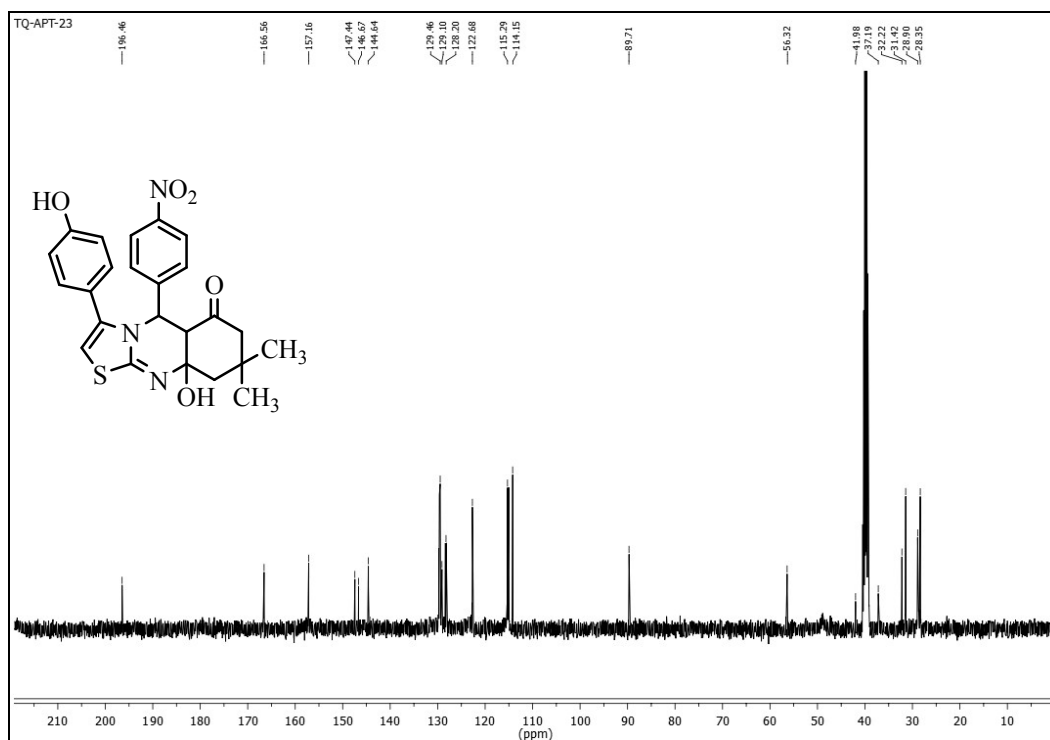

Figure S52.  $^{13}\text{C}$  NMR spectrum of 5aq in  $\text{DMSO-d}_6$

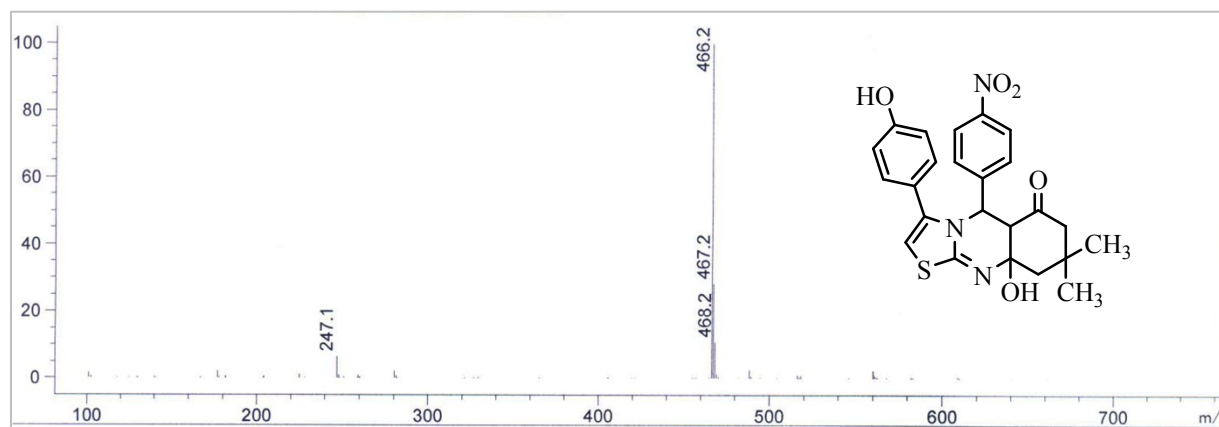

Figure S53. LC-MS spectrum of 5aq

6.  $^1\text{H}$ ,  $^{13}\text{C}$  NMR and mass spectra of compounds 5aa and 5aq

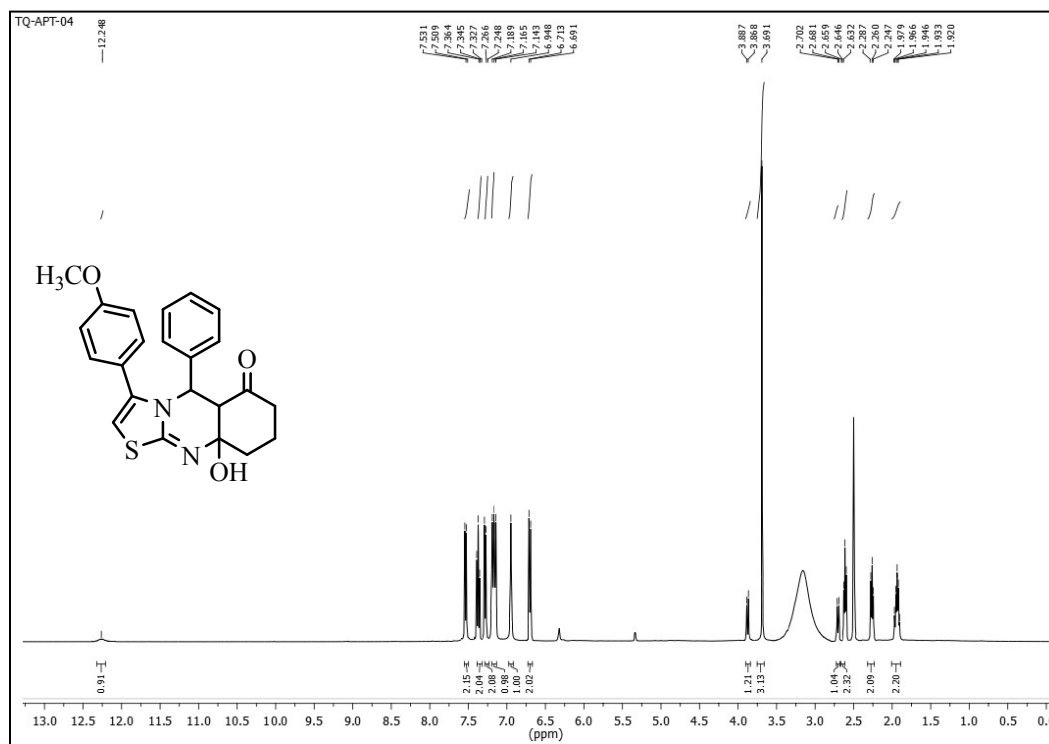

Figure S54.  $^1\text{H}$  NMR spectrum of 5ba in DMSO- $d_6$

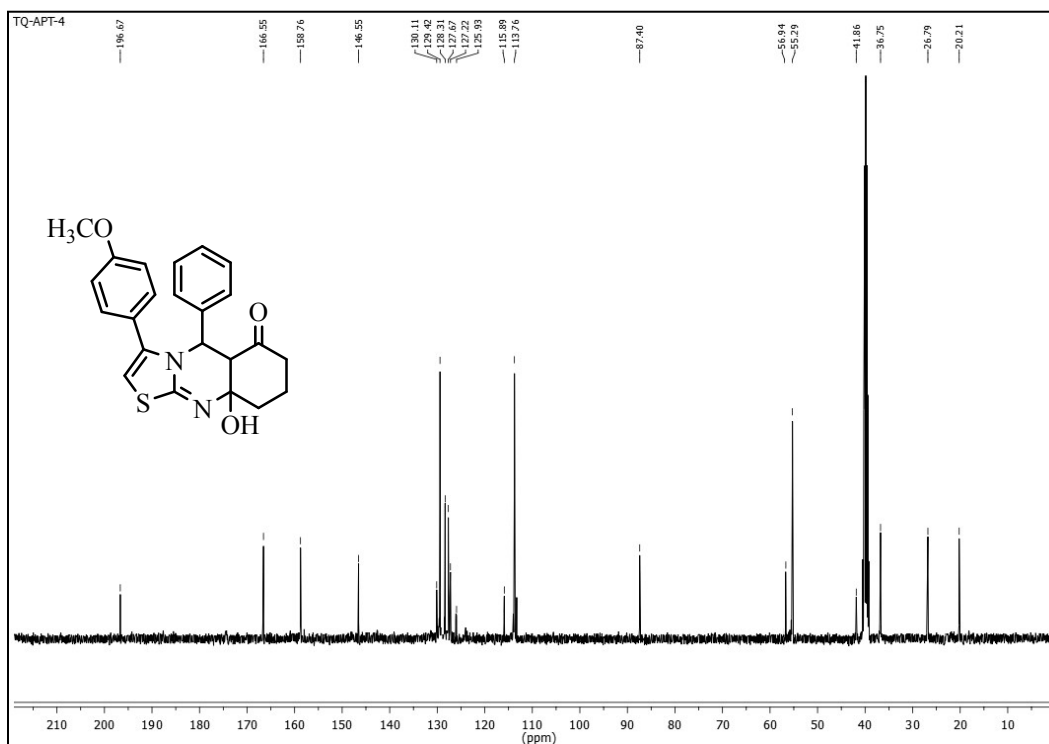

Figure S55.  $^{13}\text{C}$  NMR spectrum of 5ba in DMSO- $d_6$



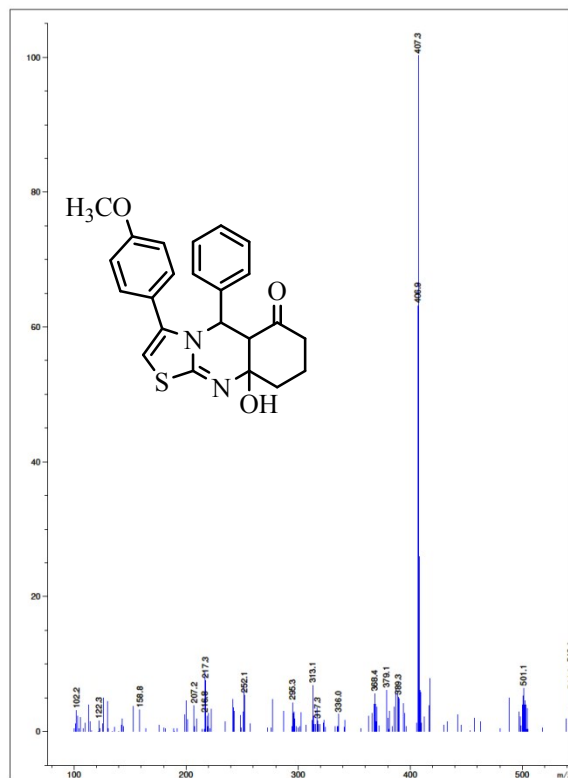

Figure S56. ESI-MS spectrum of 5ba

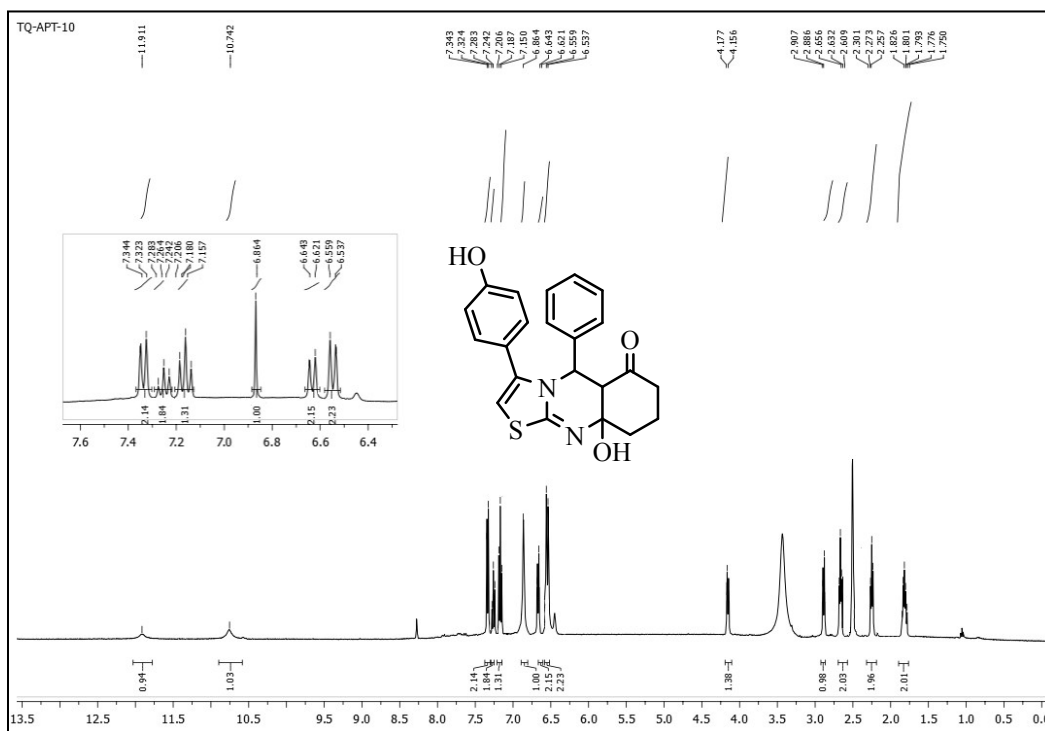

Figure S57. <sup>1</sup>H NMR spectrum of 5bb in DMSO-d<sub>6</sub>

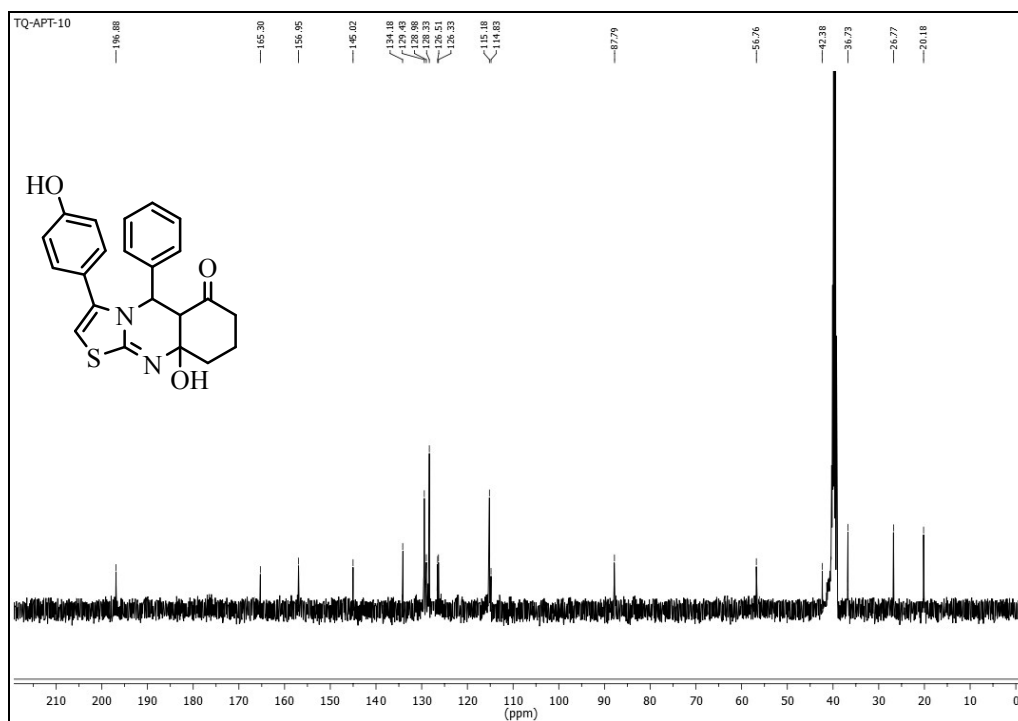

Figure S58. <sup>13</sup>C NMR spectrum of **5bb** in DMSO-d<sub>6</sub>

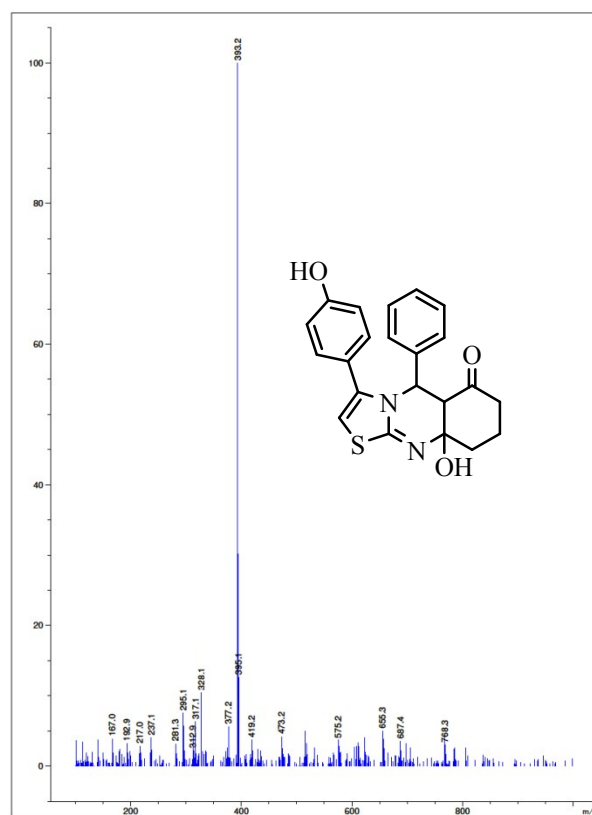

Figure S59. ESI-MS spectrum of **5bb**

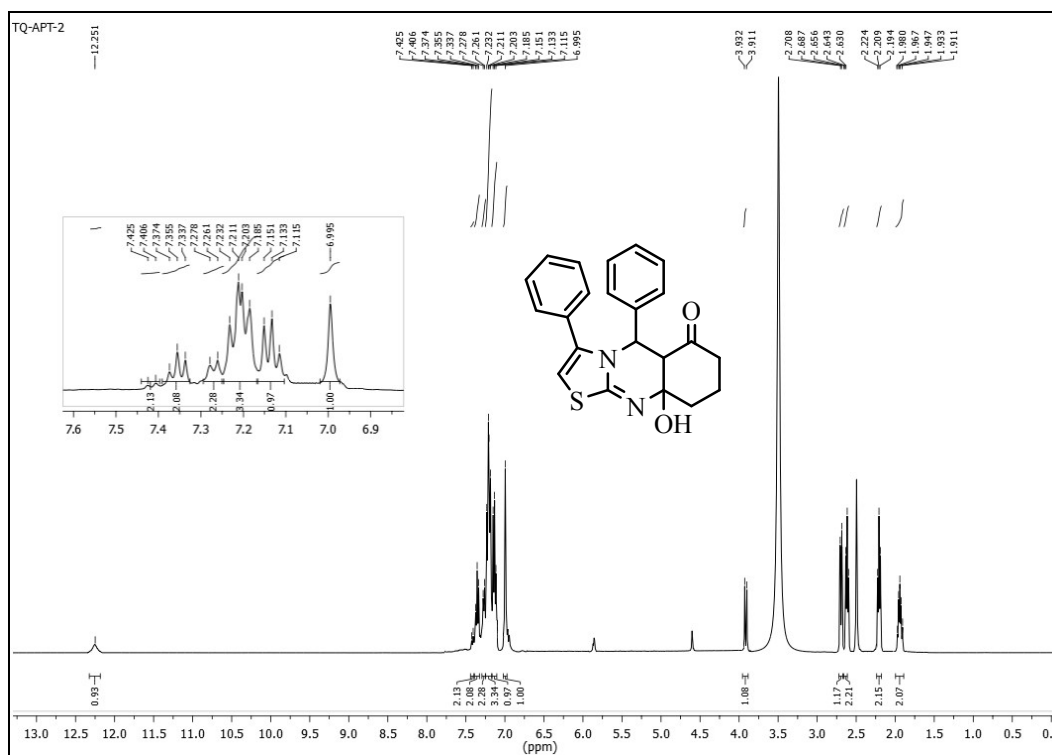

Figure S60.  $^1\text{H}$  NMR spectrum of **5bc** in  $\text{DMSO-d}_6$

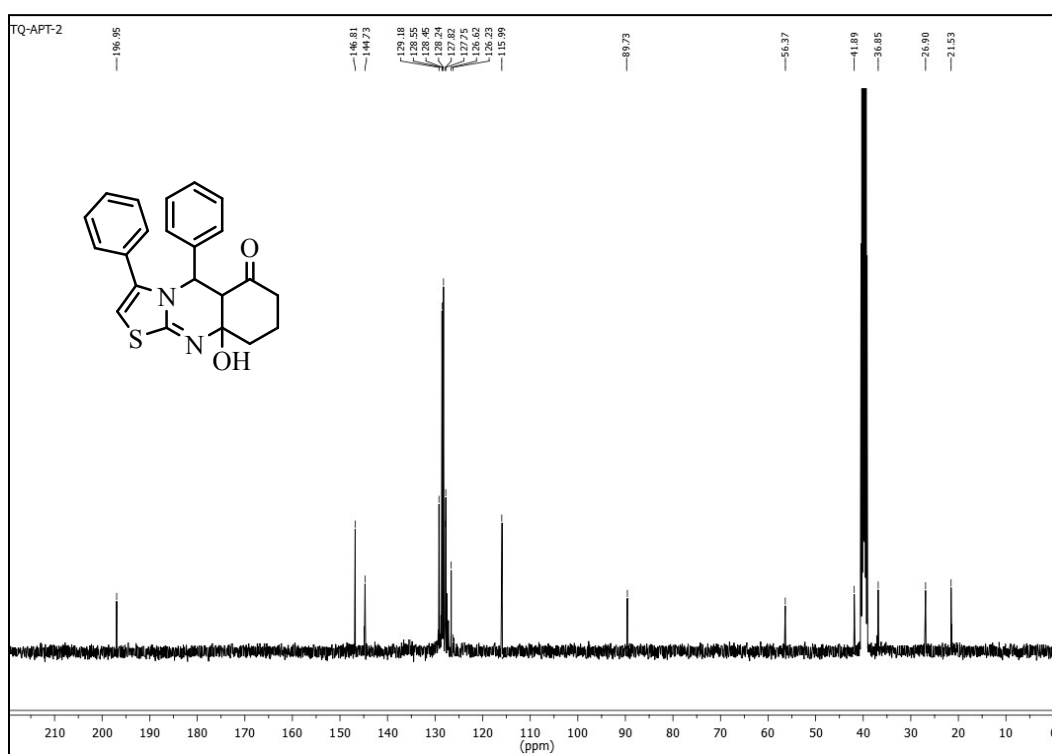

Figure S61.  $^{13}\text{C}$  NMR spectrum of **5bc** in  $\text{DMSO-d}_6$

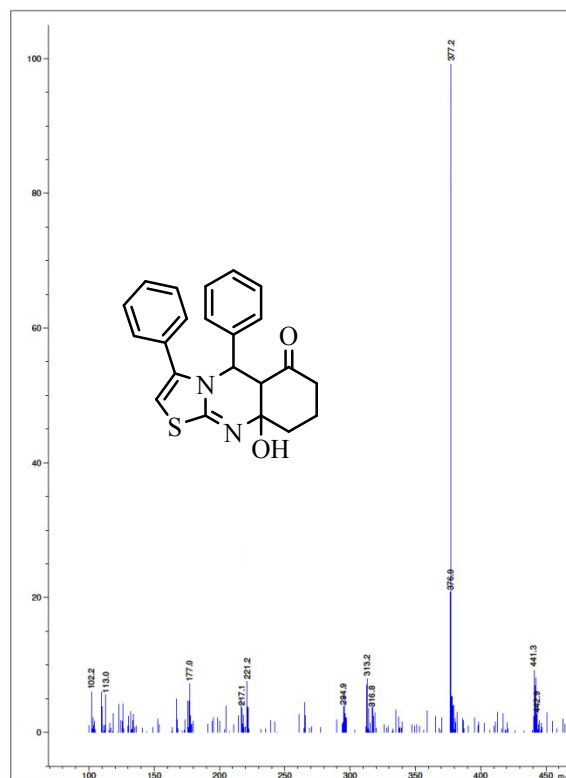

Figure S62. ESI-MS spectrum of 5bc

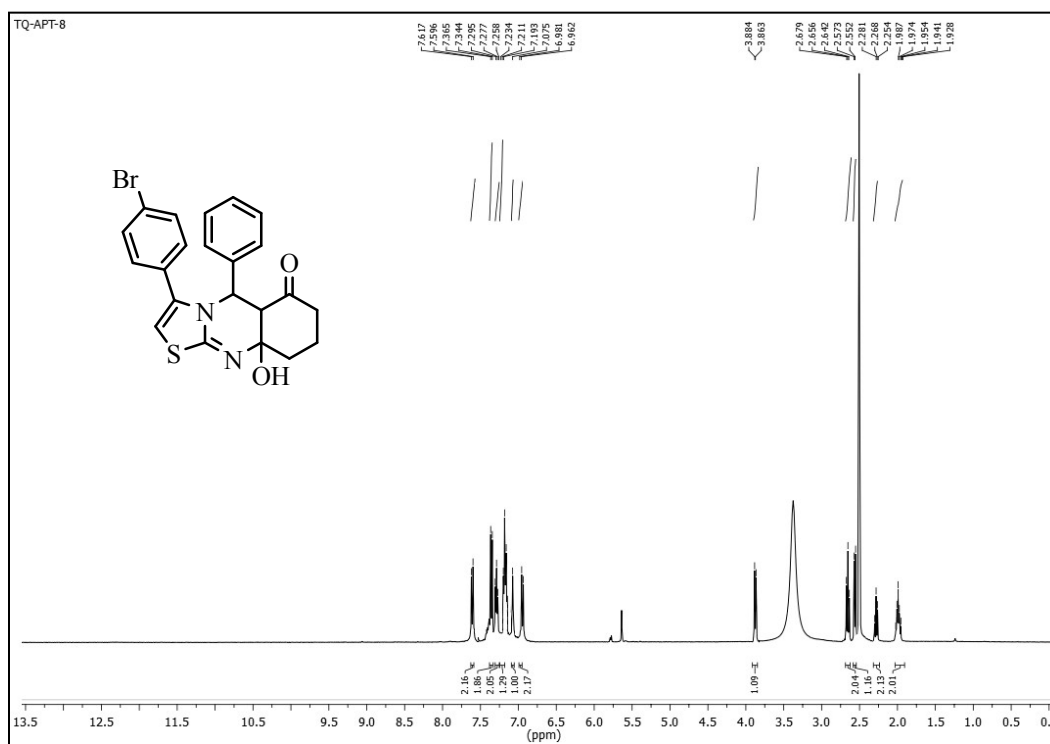

Figure S63. <sup>1</sup>H NMR spectrum of 5bd in DMSO-d<sub>6</sub>

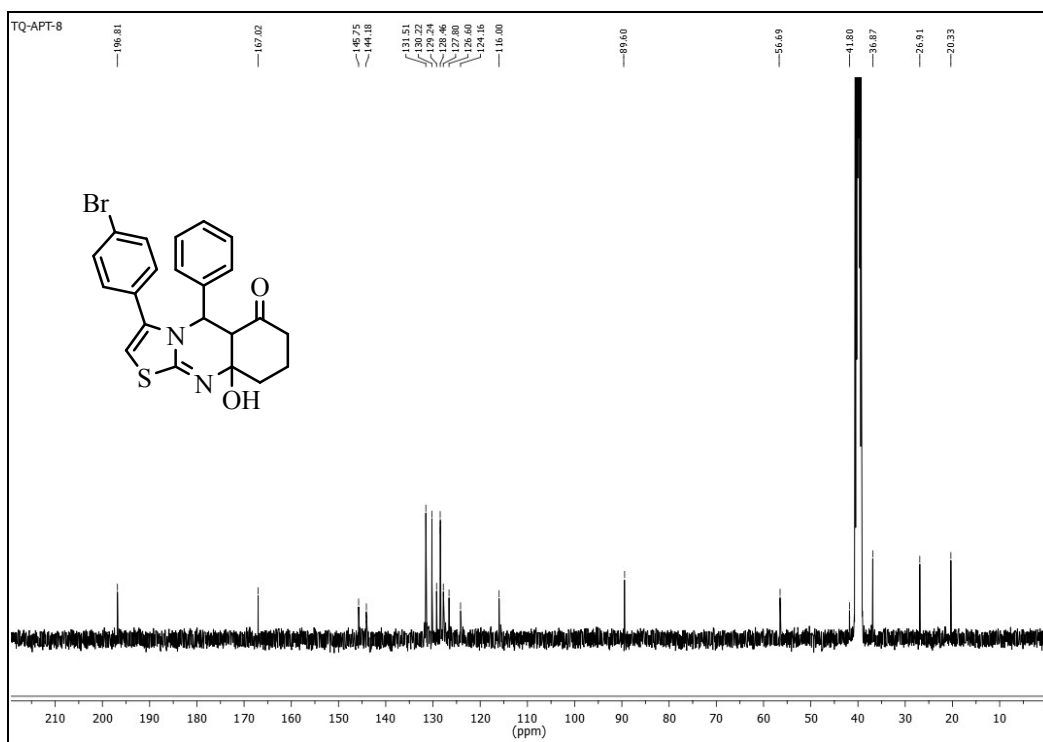

**Figure S64.**  $^{13}\text{C}$  NMR spectrum of **5bd** in  $\text{DMSO-d}_6$

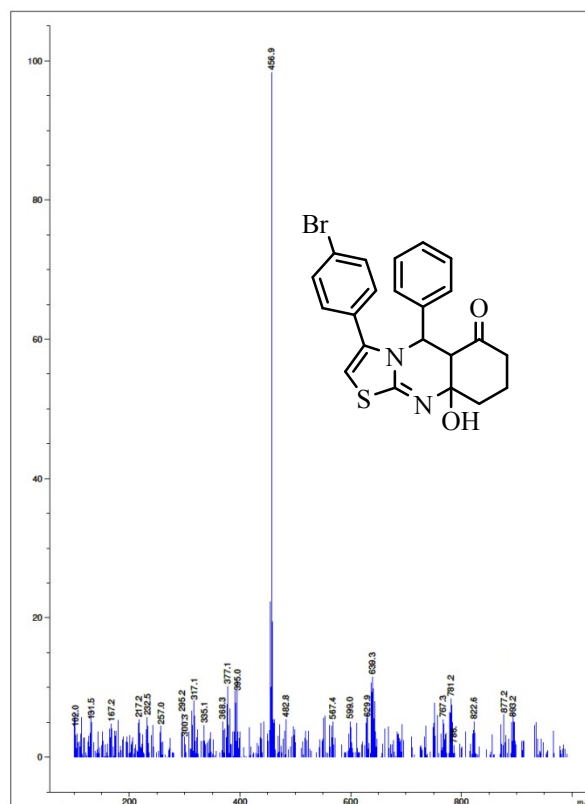

**Figure S65.** ESI-MS spectrum of **5bd**

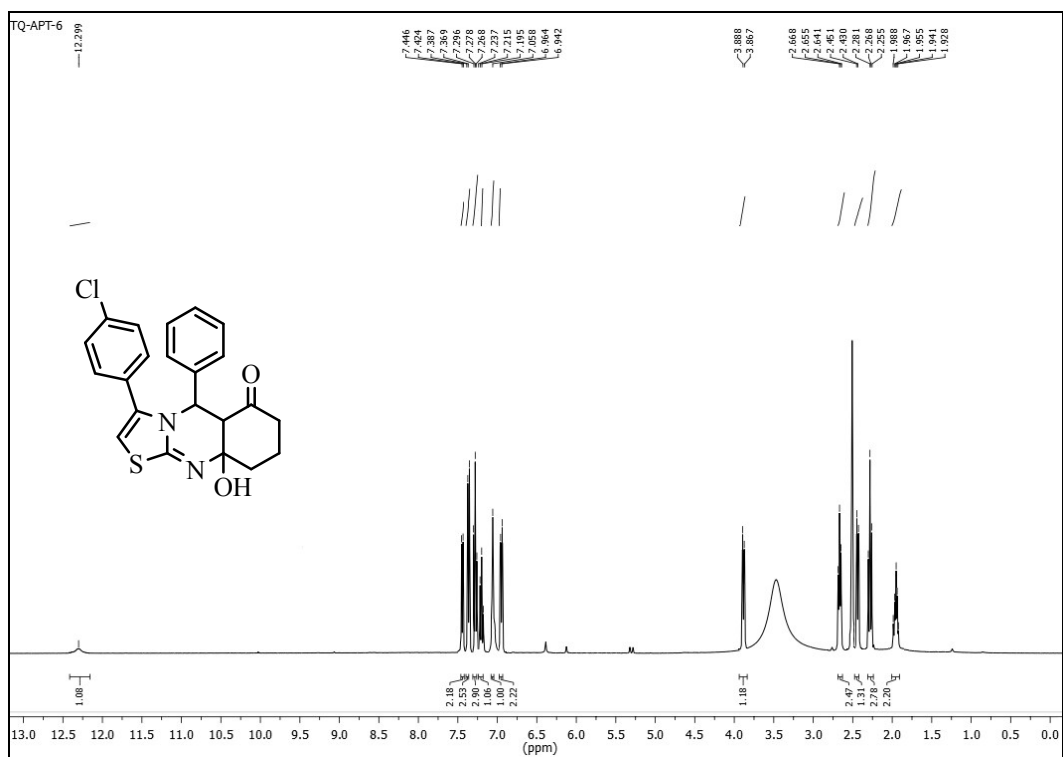

Figure S66. <sup>1</sup>H NMR spectrum of **5be** in DMSO-d<sub>6</sub>

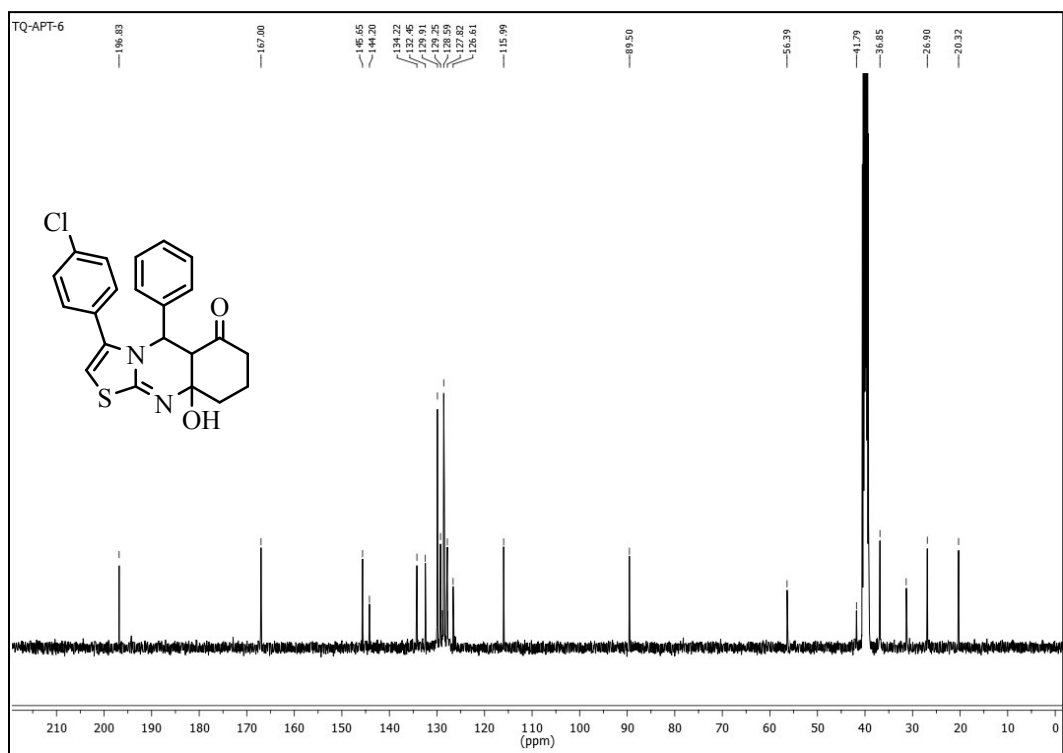

Figure S67. <sup>13</sup>C NMR spectrum of **5be** in DMSO-d<sub>6</sub>

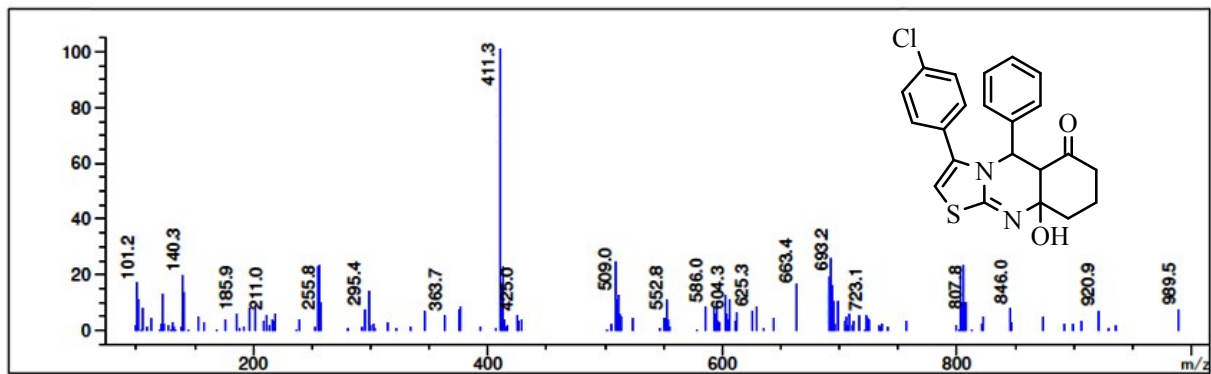

Figure S68. ESI-MS spectrum of 5be

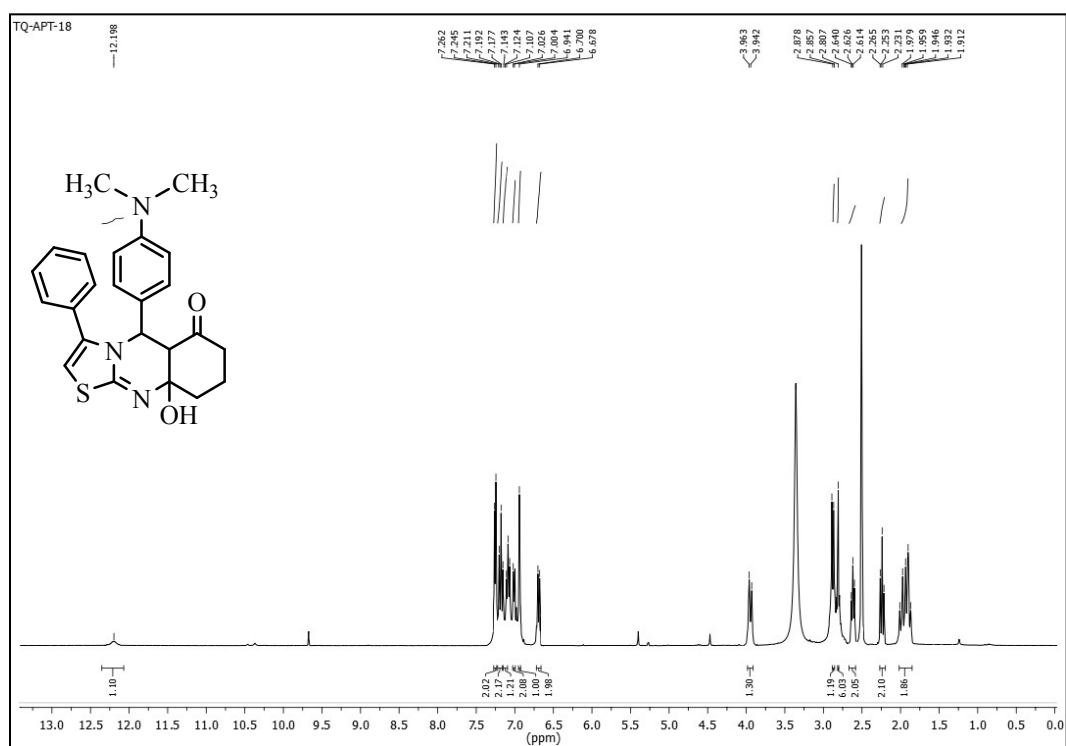

Figure S69. <sup>1</sup>H NMR spectrum of 5bf in DMSO-d<sub>6</sub>

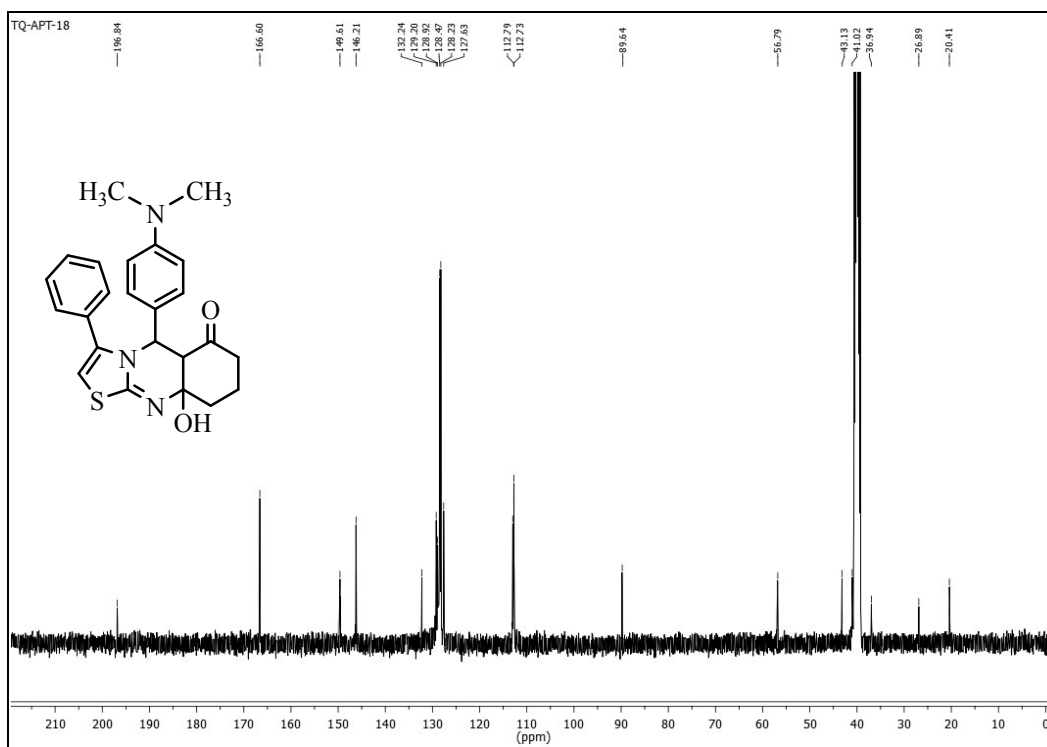

**Figure S70.**  $^{13}\text{C}$  NMR spectrum of **5bf** in  $\text{DMSO-d}_6$

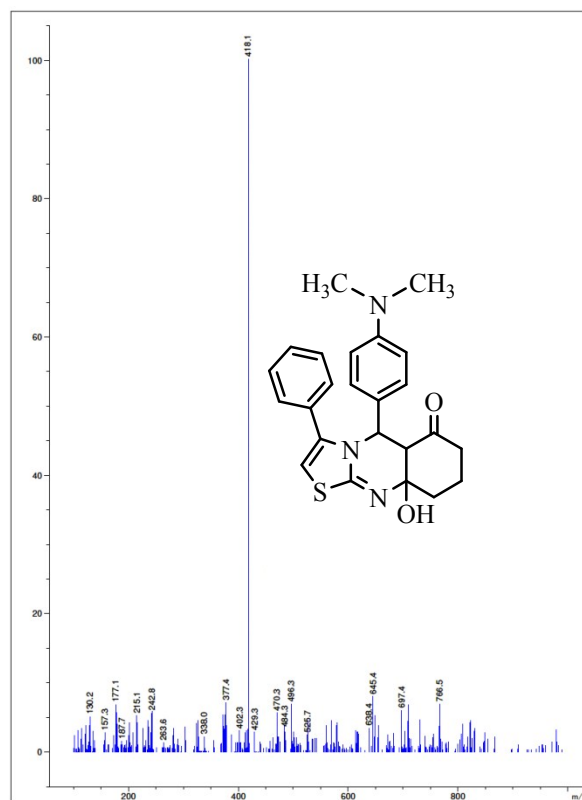

**Figure S71.** ESI-MS spectrum of **5bf**



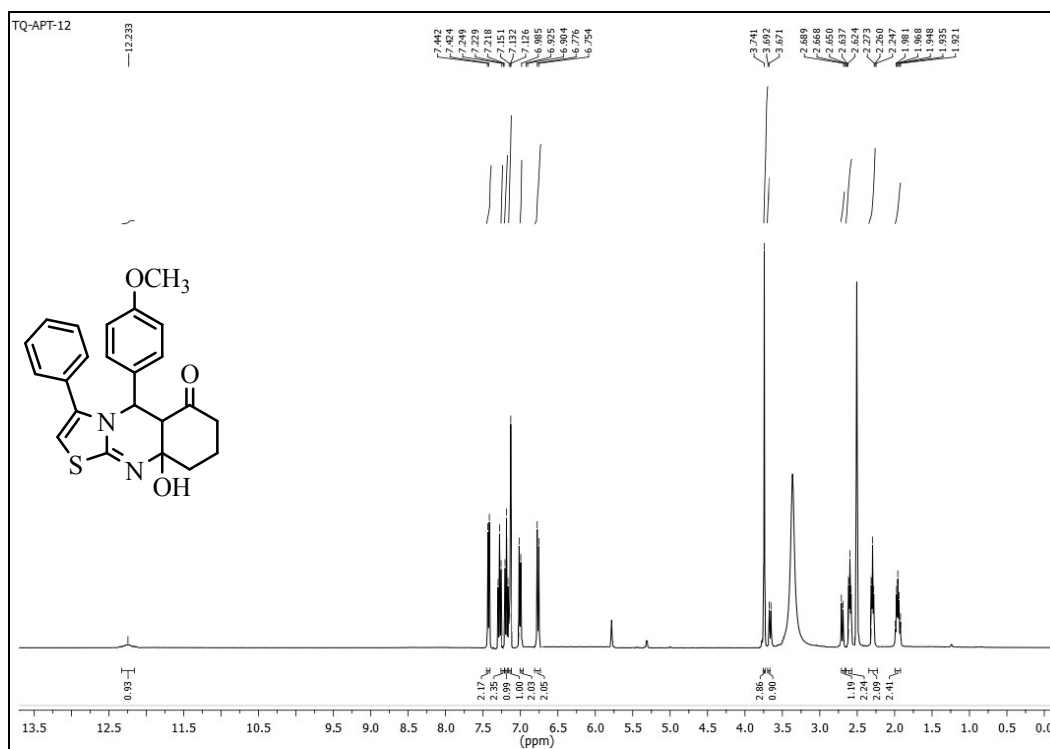

Figure S72.  $^1\text{H}$  NMR spectrum of **5bg** in  $\text{DMSO-d}_6$

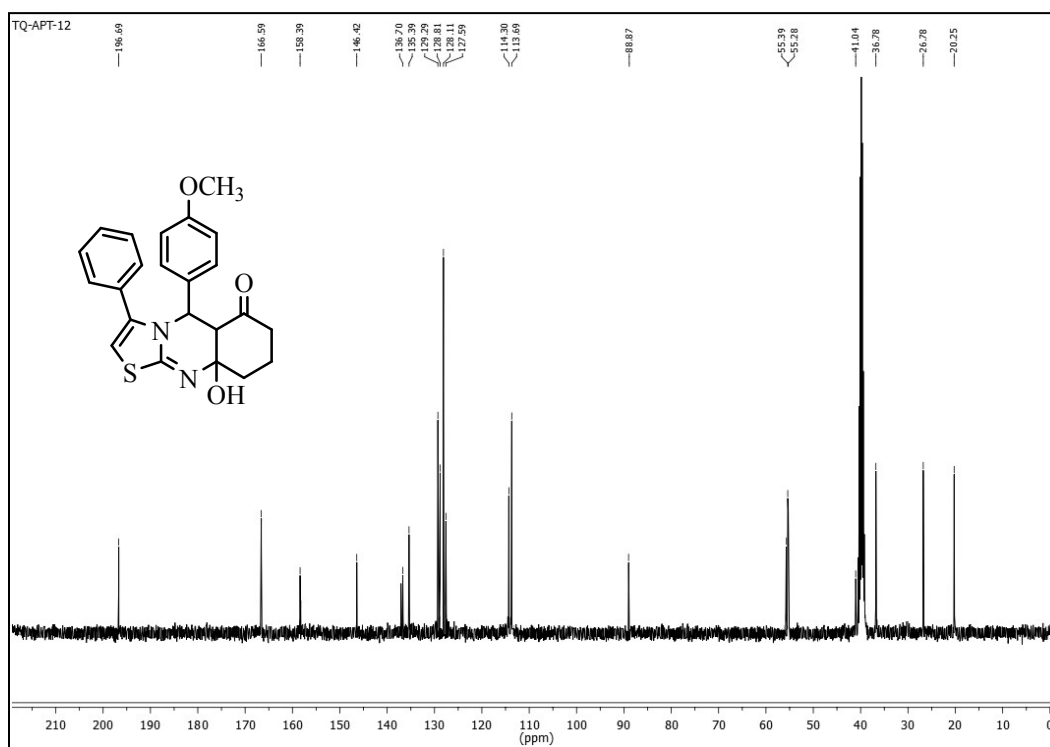

Figure S73.  $^{13}\text{C}$  NMR spectrum of **5bg** in  $\text{DMSO-d}_6$

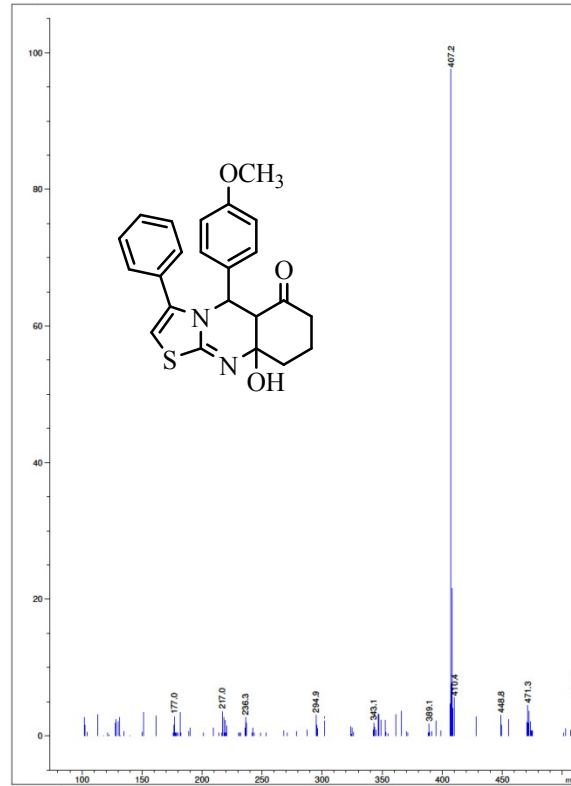

**Figure S74.** ESI-MS spectrum of **5bg**

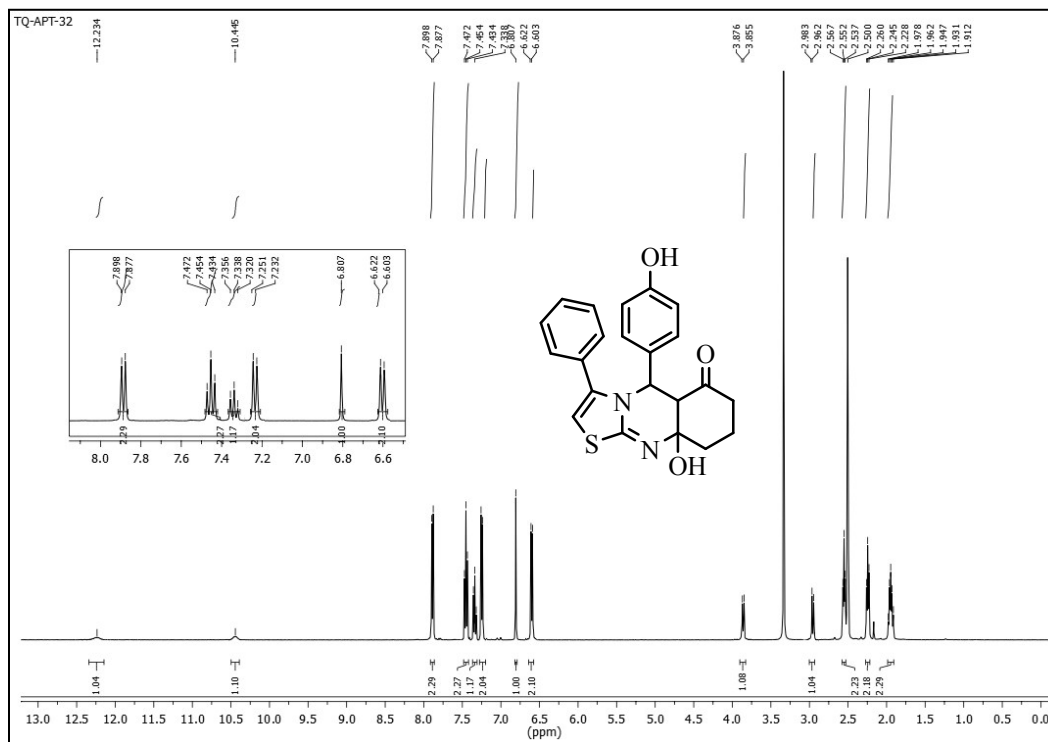

**Figure S75.** <sup>1</sup>H NMR spectrum of **5bh** in DMSO-d<sub>6</sub>

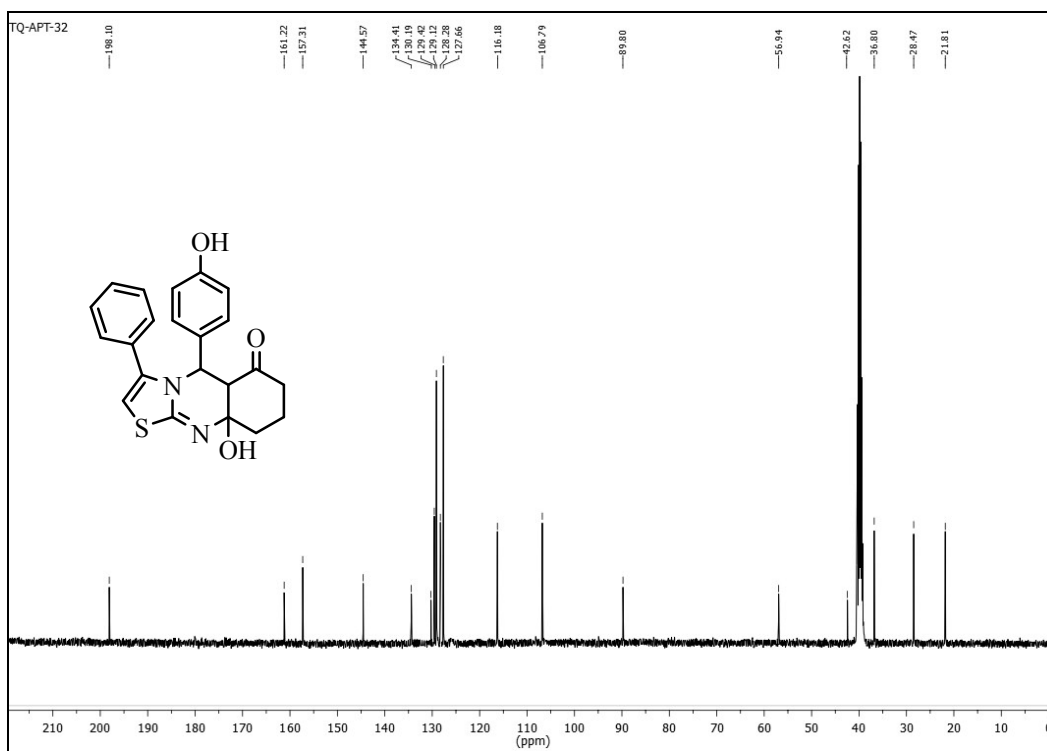

**Figure S76.**  $^{13}\text{C}$  NMR spectrum of **5bh** in  $\text{DMSO-d}_6$

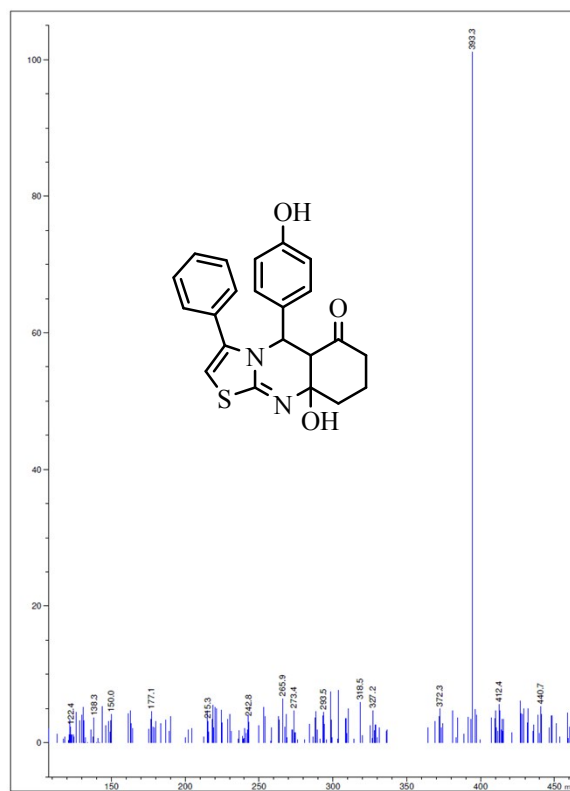

**Figure S77.** ESI-MS spectrum of **5bh**

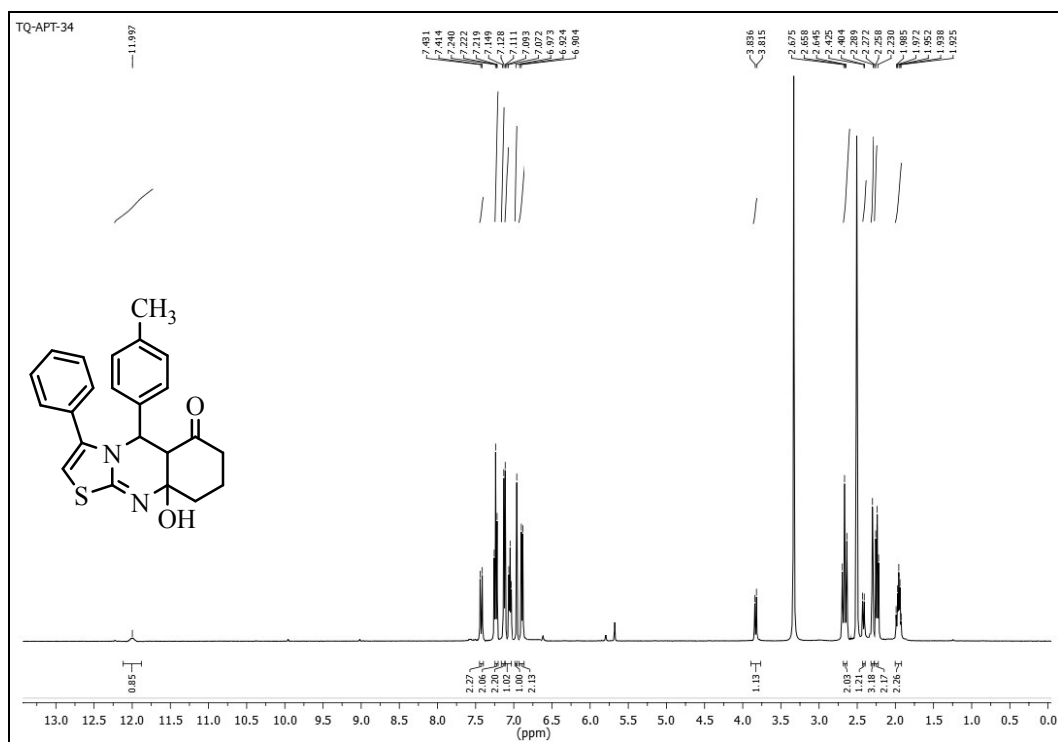

Figure S78.  $^1\text{H}$  NMR spectrum of **5bi** in  $\text{DMSO-d}_6$

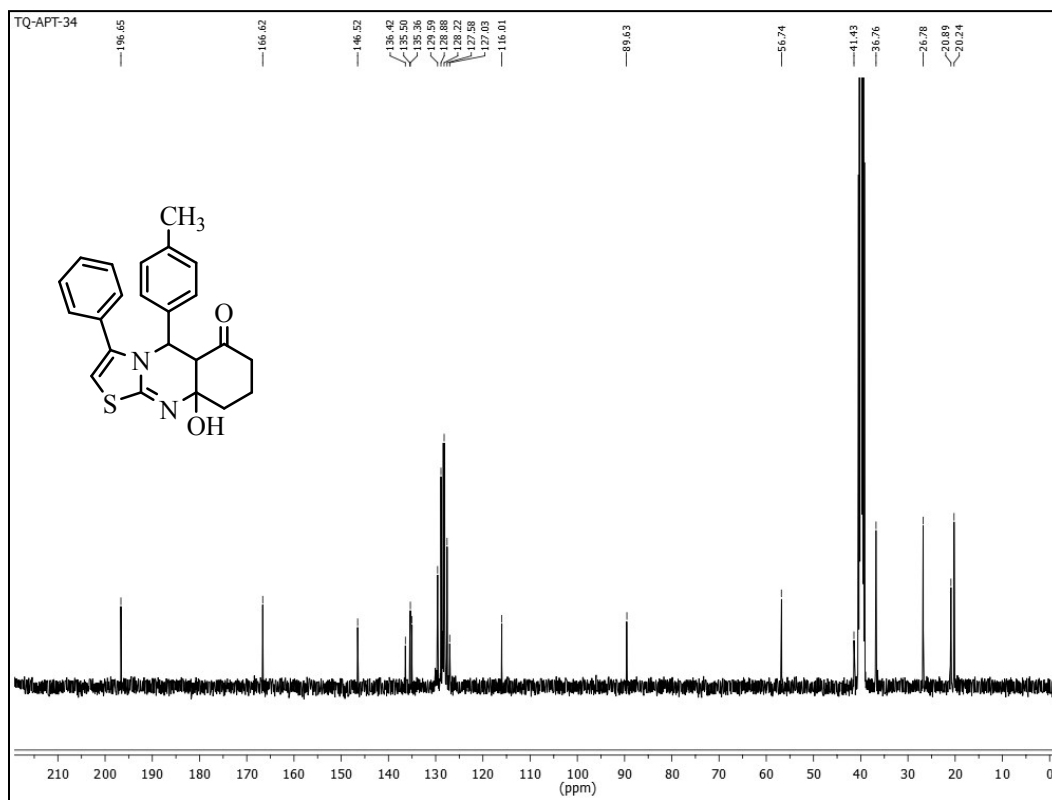

Figure S79.  $^{13}\text{C}$  NMR spectrum of **5bi** in  $\text{DMSO-d}_6$

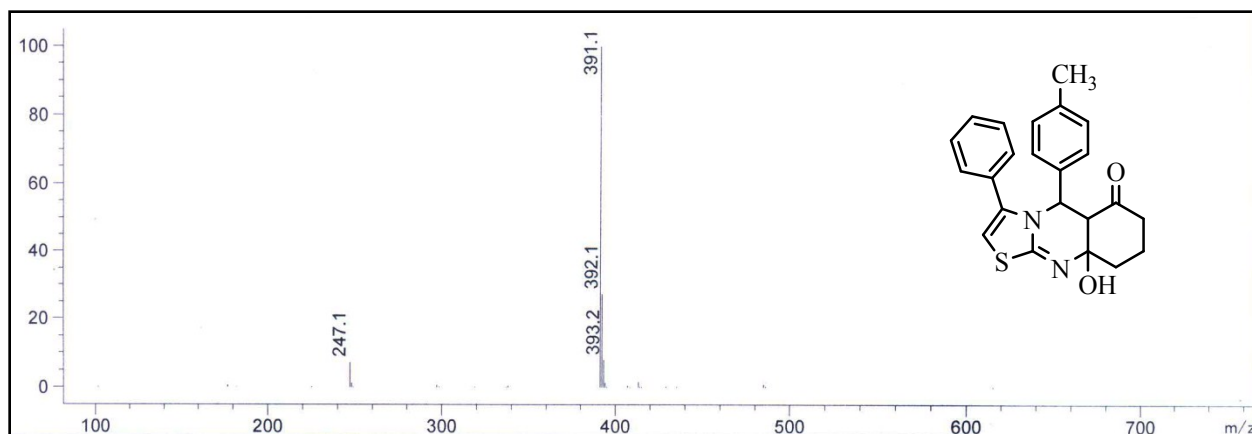

Figure S80. LC-MS spectrum of **5bi**

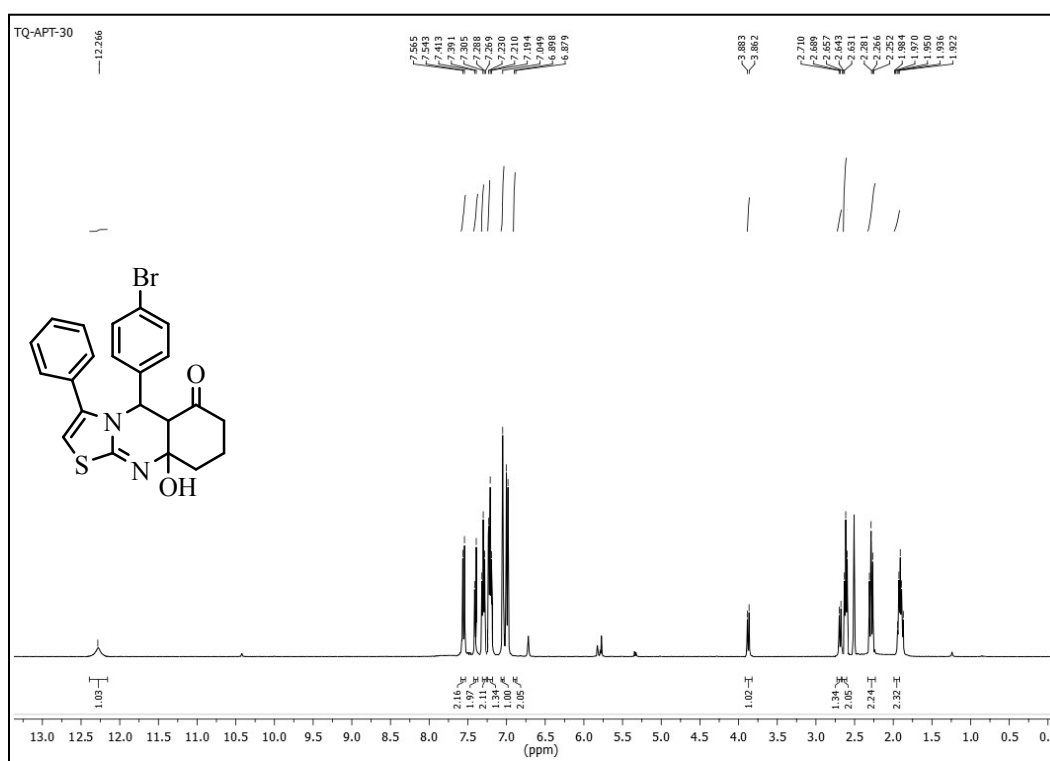

Figure S81.  $^1\text{H}$  NMR spectrum of **5bj** in  $\text{DMSO-d}_6$

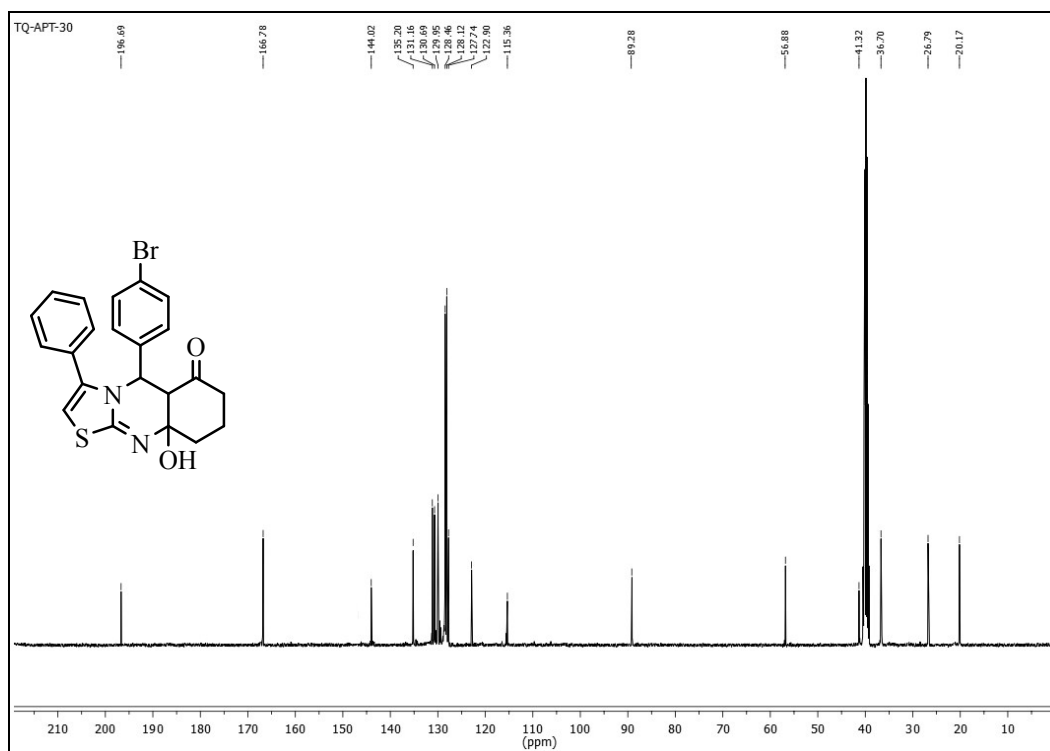

Figure S82. <sup>13</sup>C NMR spectrum of 5bj in DMSO-d<sub>6</sub>

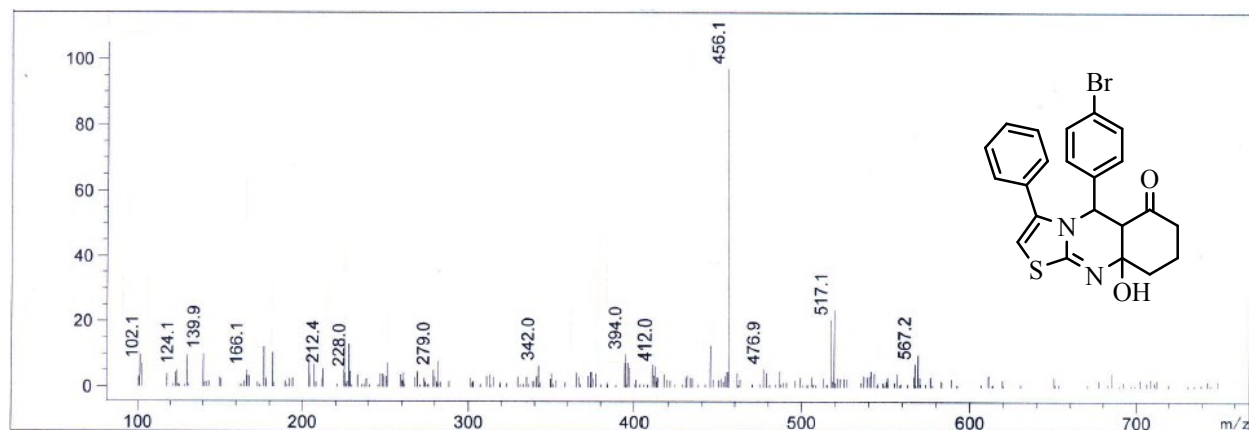

Figure S83. LC-MS spectrum of 5bj

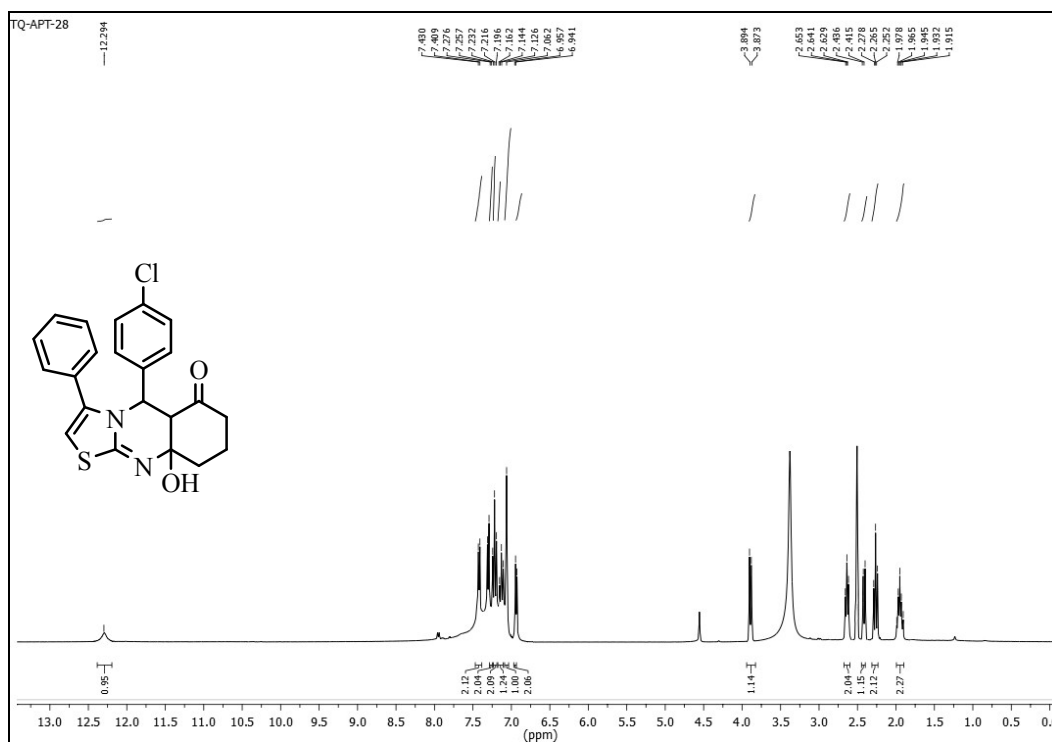

Figure S84.  $^1\text{H}$  NMR spectrum of **5bk** in  $\text{DMSO-d}_6$

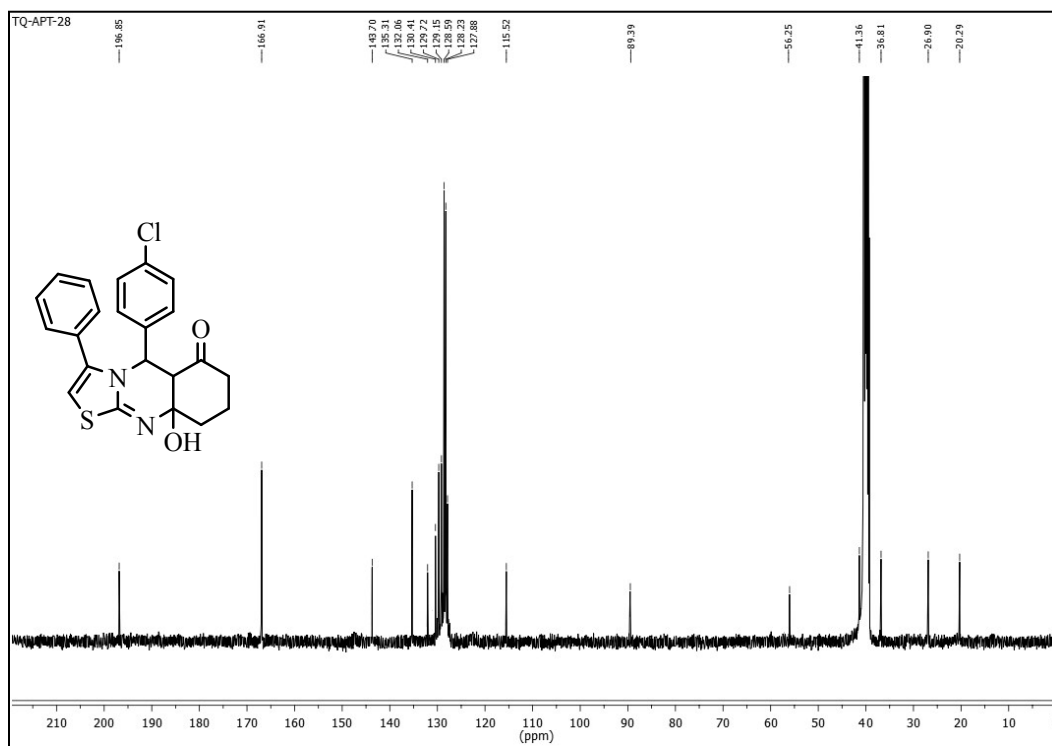

Figure S85.  $^{13}\text{C}$  NMR spectrum of **5bk** in  $\text{DMSO-d}_6$

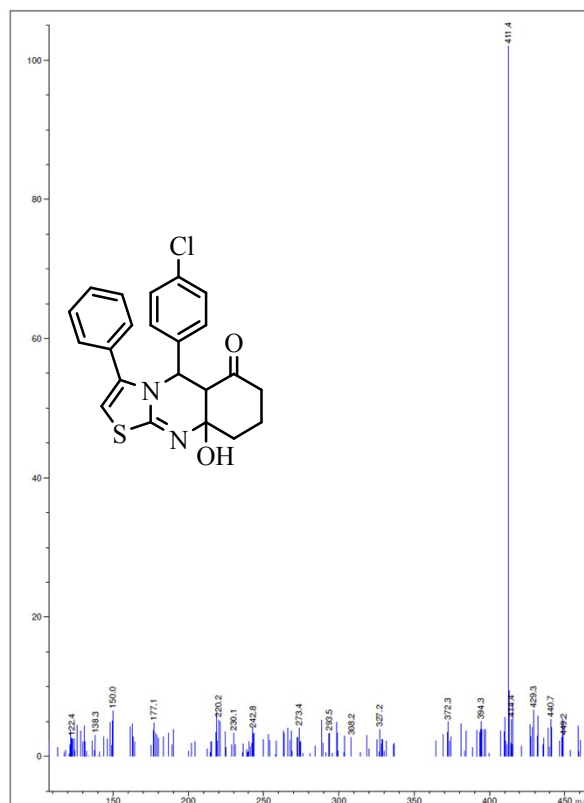

Figure S86. ESI-MS spectrum of 5bk

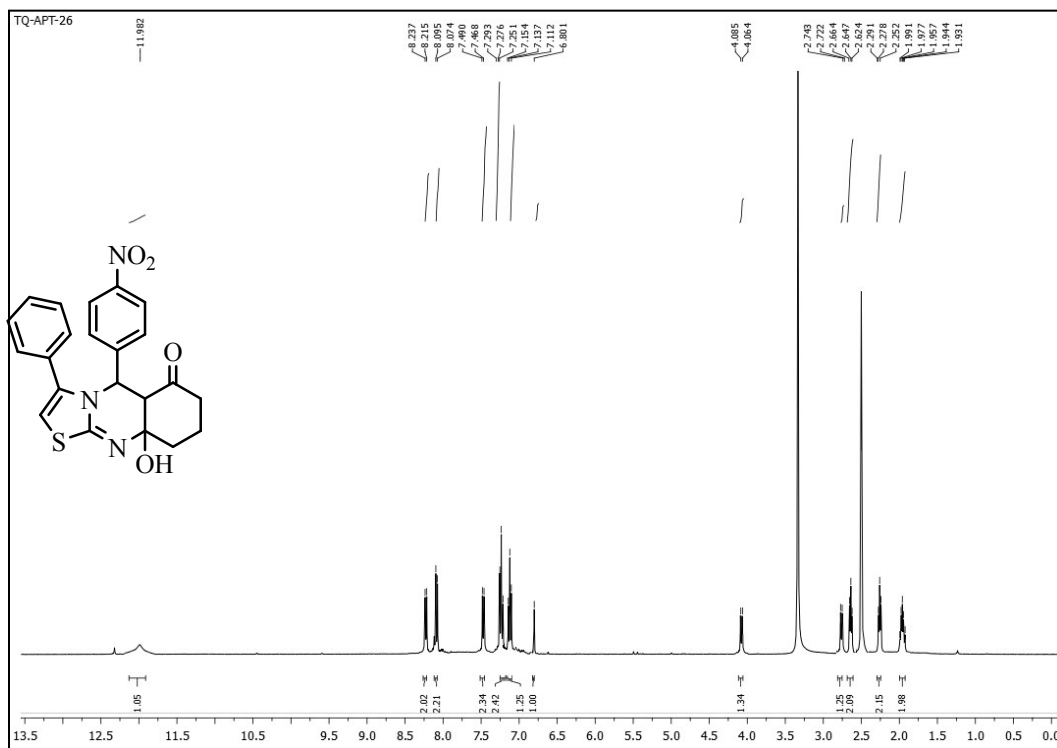

Figure S87. <sup>1</sup>H NMR spectrum of 5bl in DMSO-d<sub>6</sub>



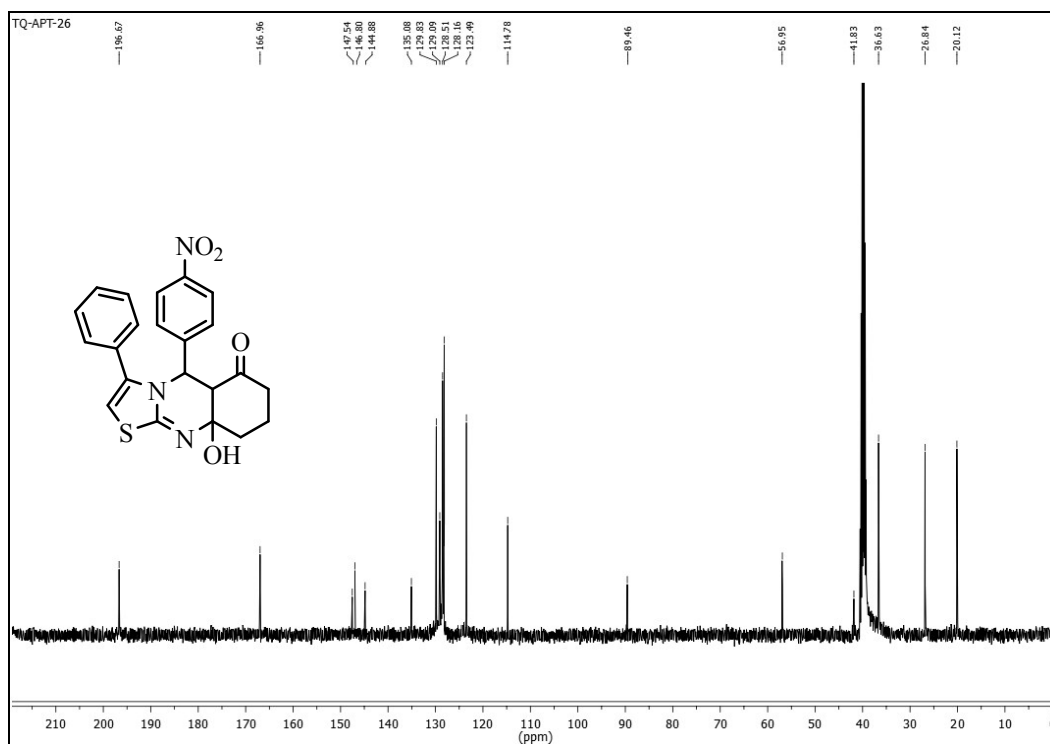

**Figure S88.**  $^{13}\text{C}$  NMR spectrum of **5bl** in  $\text{DMSO-d}_6$

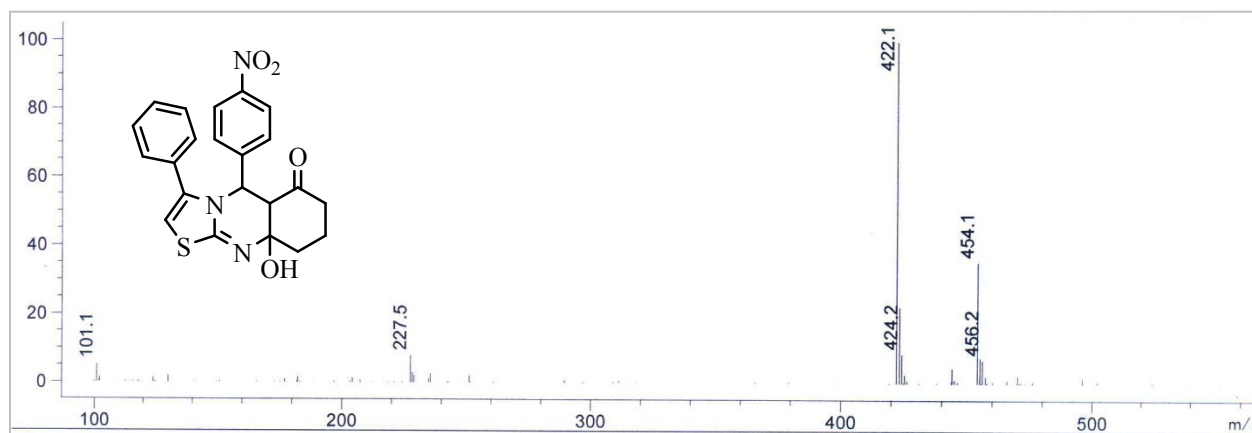

**Figure S89.** ESI-MS spectrum of **5bl**

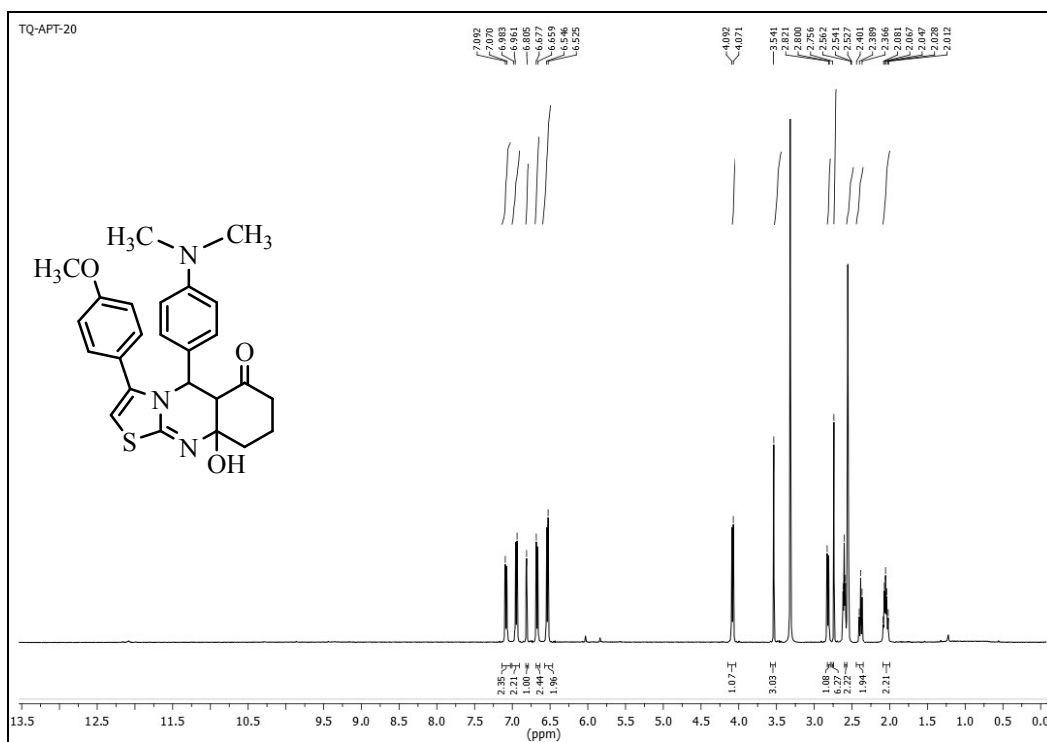

Figure S90. <sup>1</sup>H NMR spectrum of **5bm** in DMSO-d<sub>6</sub>

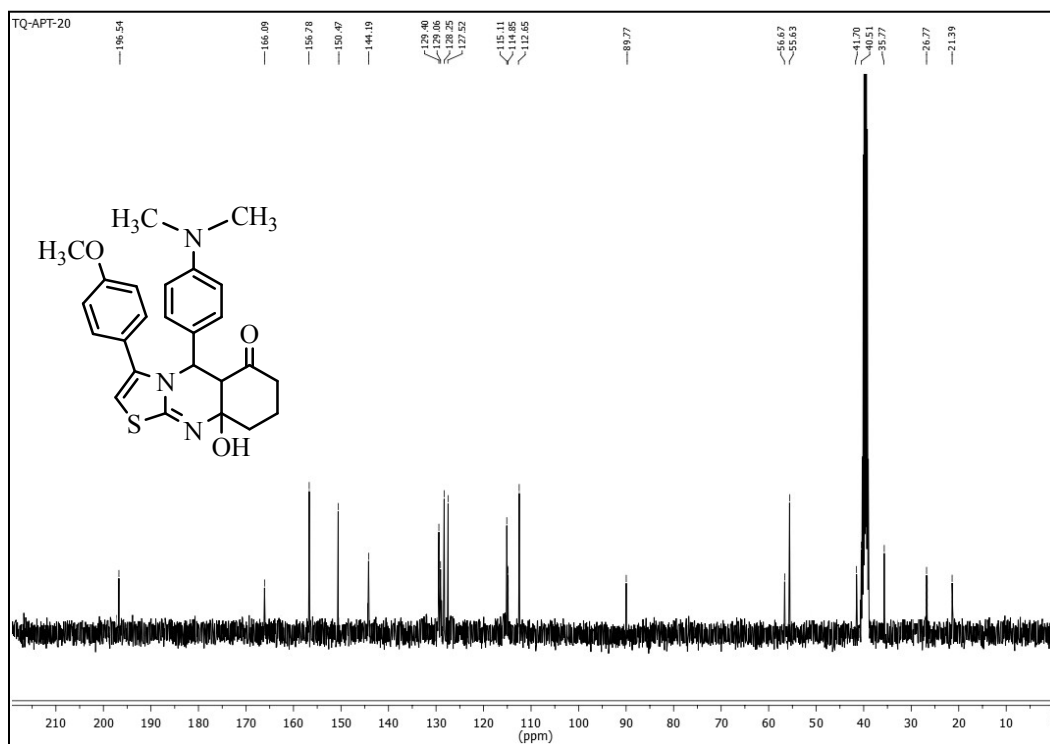

Figure S91. <sup>13</sup>C NMR spectrum of **5bm** in DMSO-d<sub>6</sub>

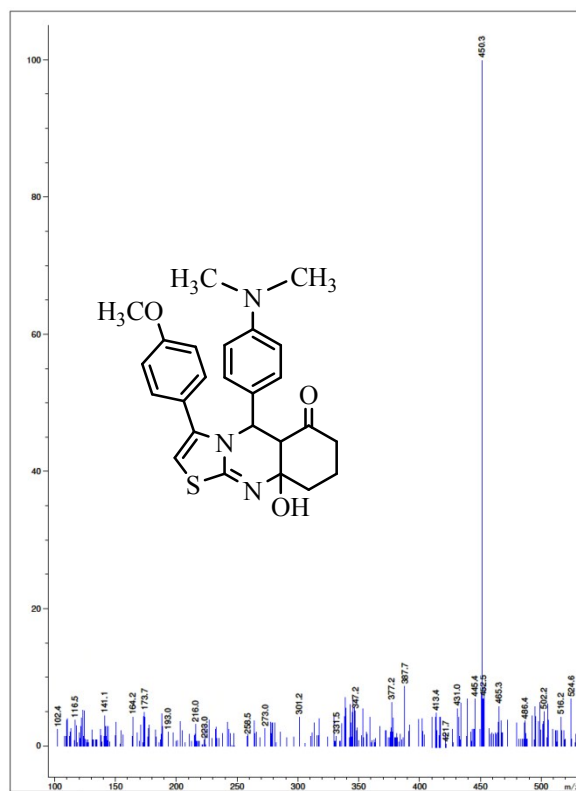

Figure S92. ESI-MS spectrum of 5bm

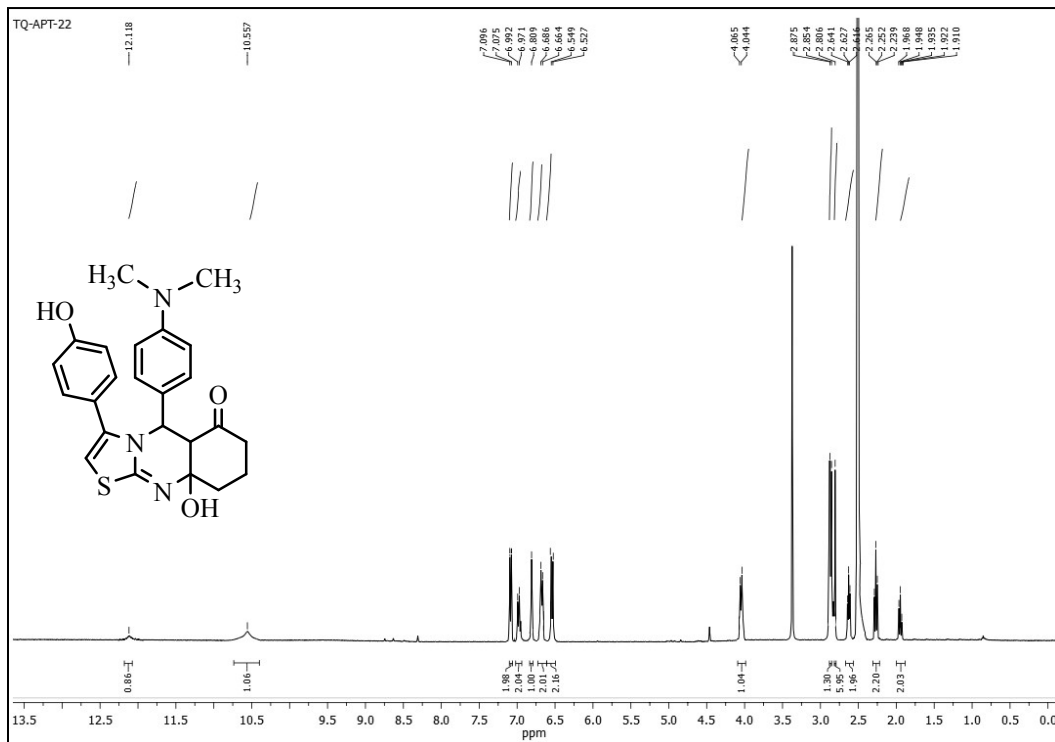

Figure S93. <sup>1</sup>H NMR spectrum of 5bn in DMSO-d<sub>6</sub>

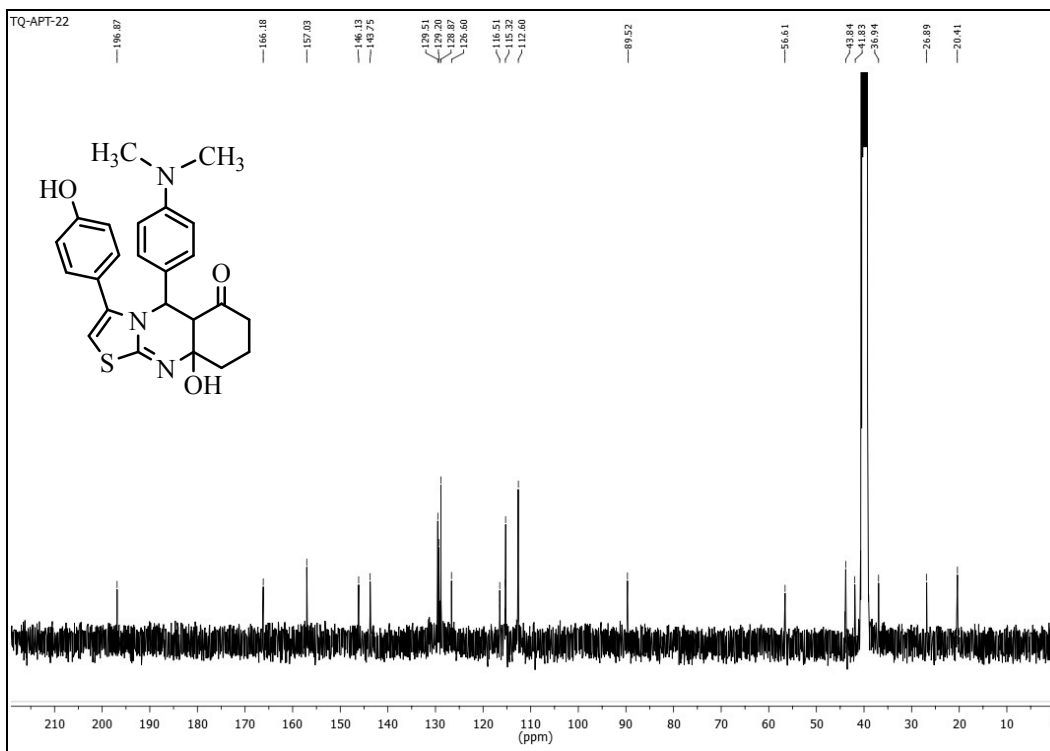

Figure S94.  $^{13}\text{C}$  NMR spectrum of 5bn in  $\text{DMSO-d}_6$

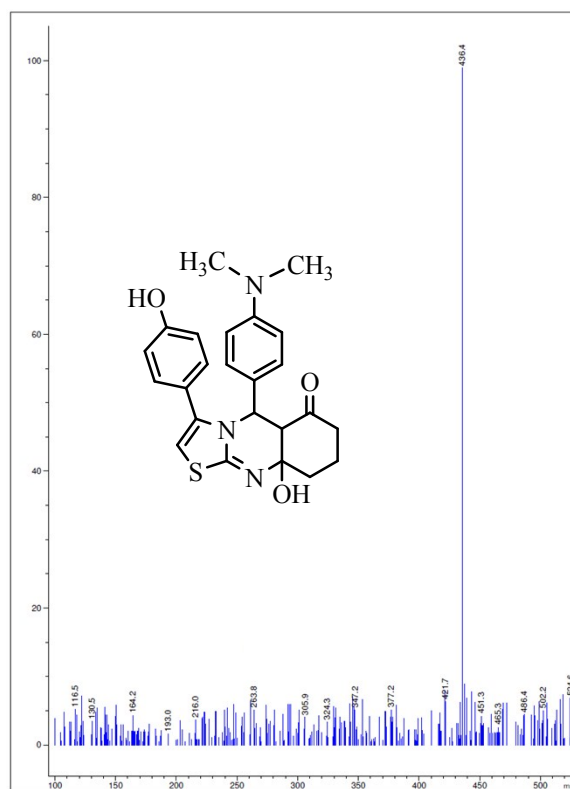

Figure S95. ESI-MS spectrum of 5bn

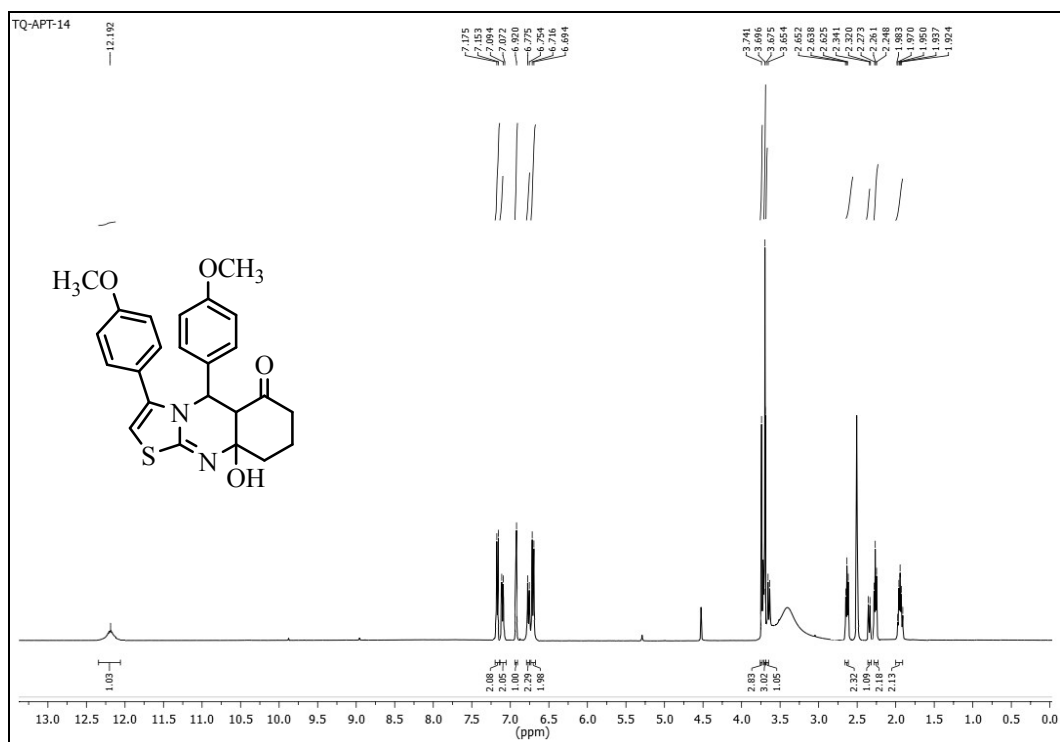

Figure S96.  $^1\text{H}$  NMR spectrum of **5bo** in  $\text{DMSO-d}_6$

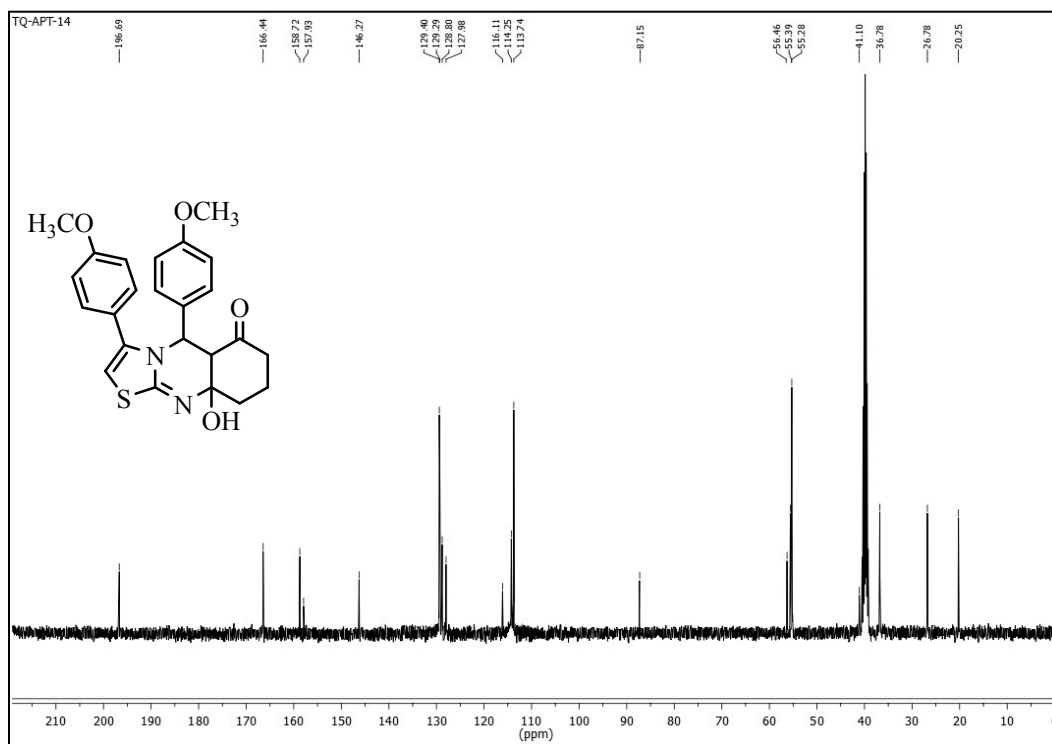

Figure S97.  $^{13}\text{C}$  NMR spectrum of **5bo** in  $\text{DMSO-d}_6$

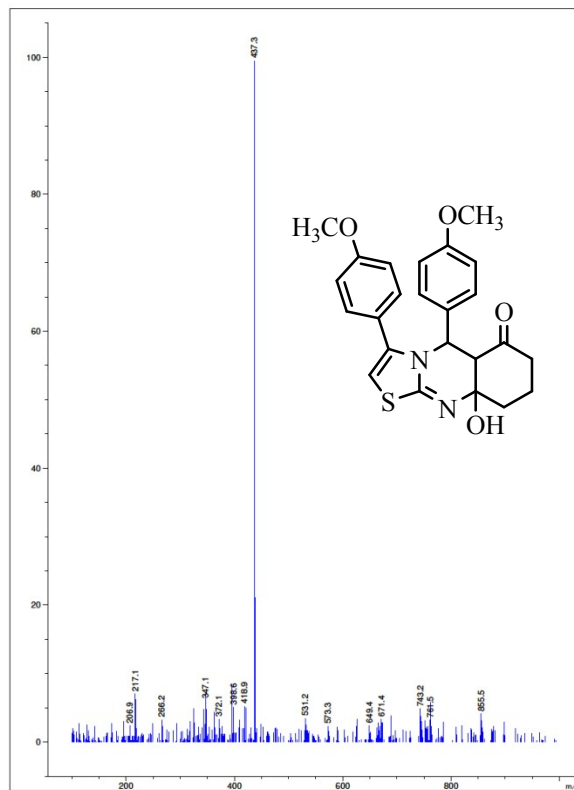

Figure S98. ESI-MS spectrum of **5bo**

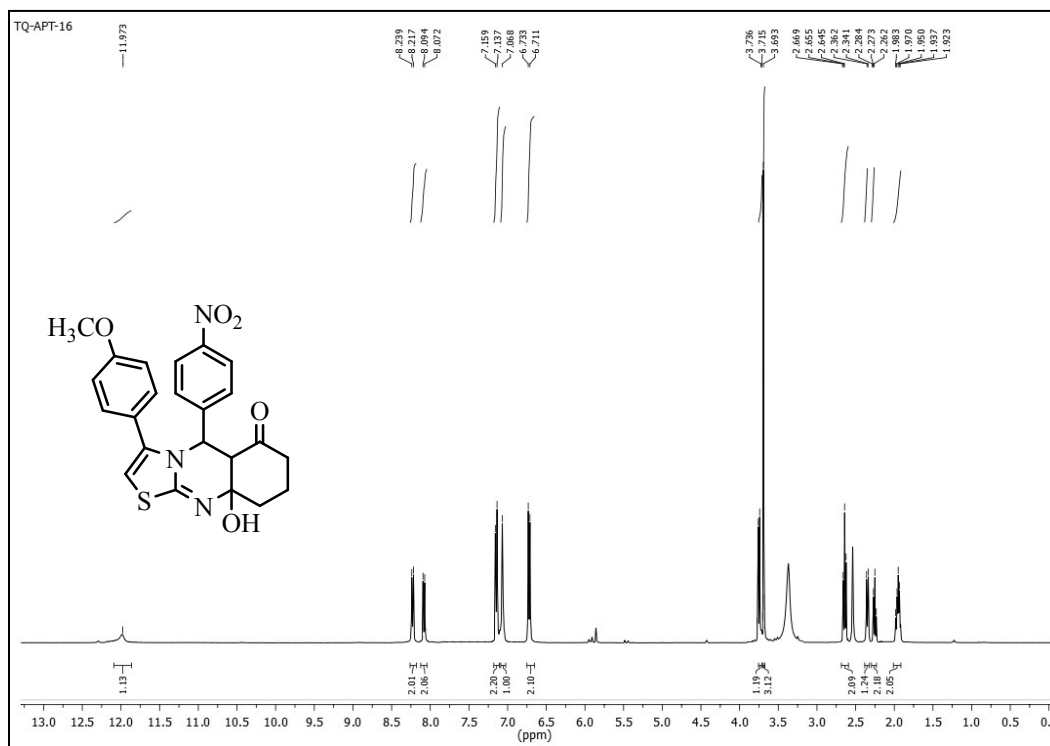

Figure S99.  $^1\text{H}$  NMR spectrum of **5bp** in  $\text{DMSO-d}_6$

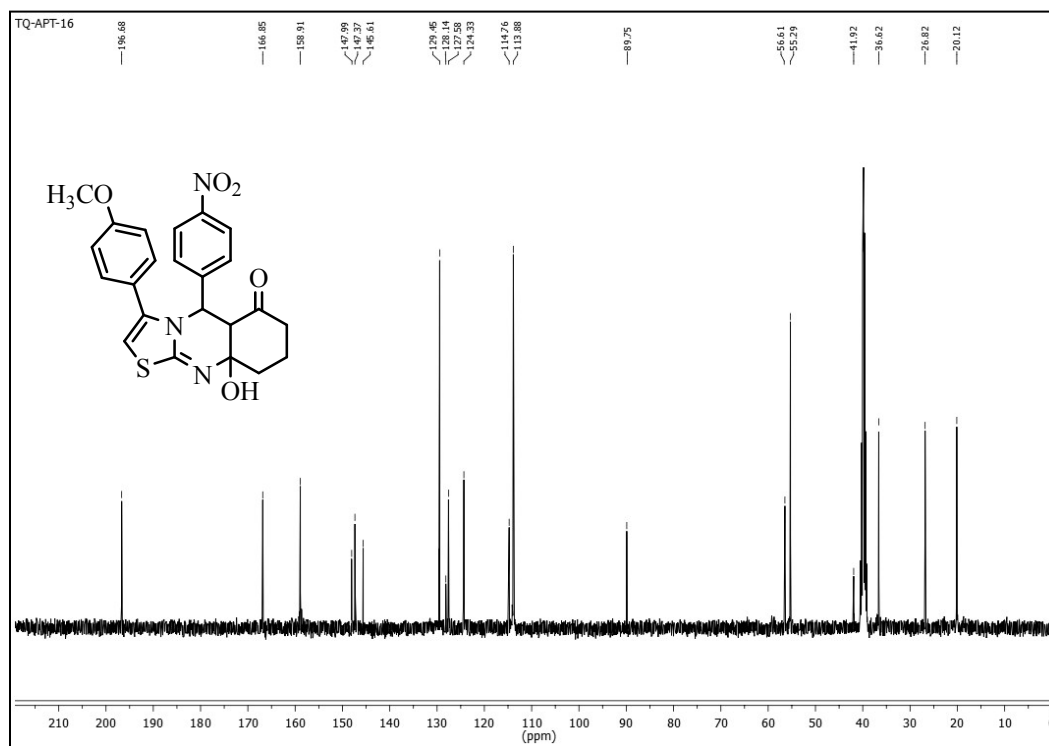

Figure S100.  $^{13}\text{C}$  NMR spectrum of **5bp** in  $\text{DMSO-d}_6$

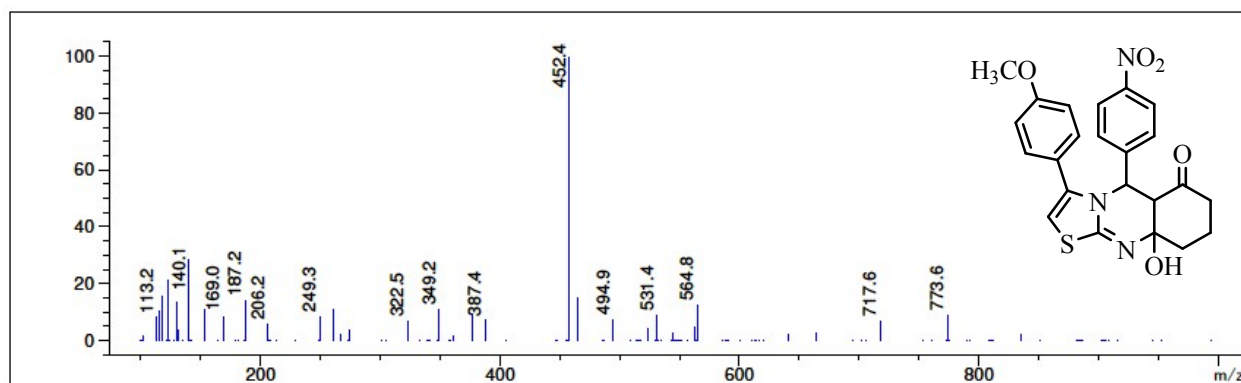

Figure S101. LC-MS spectrum of **5bp**

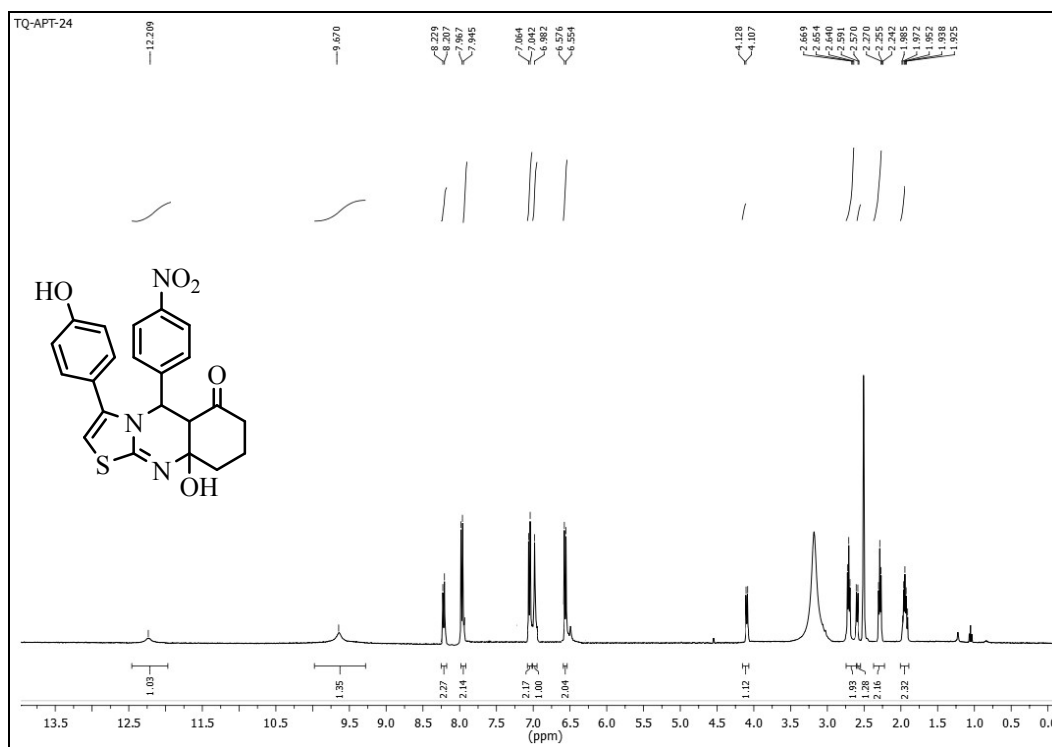

Figure S102.  $^1\text{H}$  NMR spectrum of **5bq** in  $\text{DMSO-d}_6$

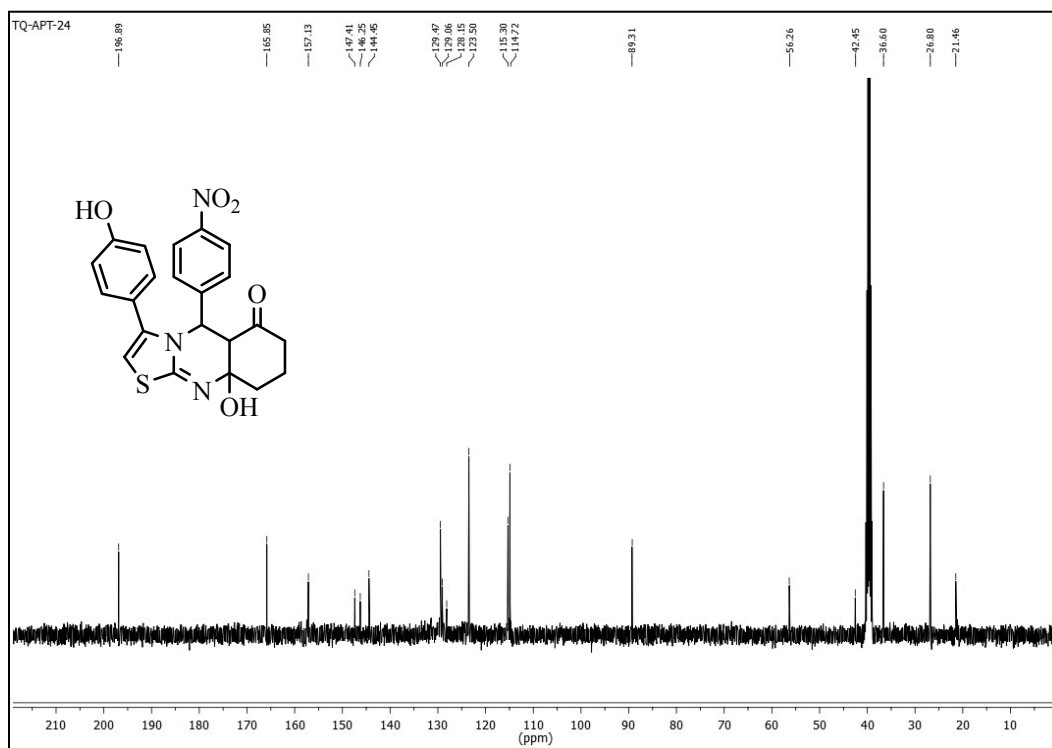

Figure S103.  $^{13}\text{C}$  NMR spectrum of **5bq** in  $\text{DMSO-d}_6$



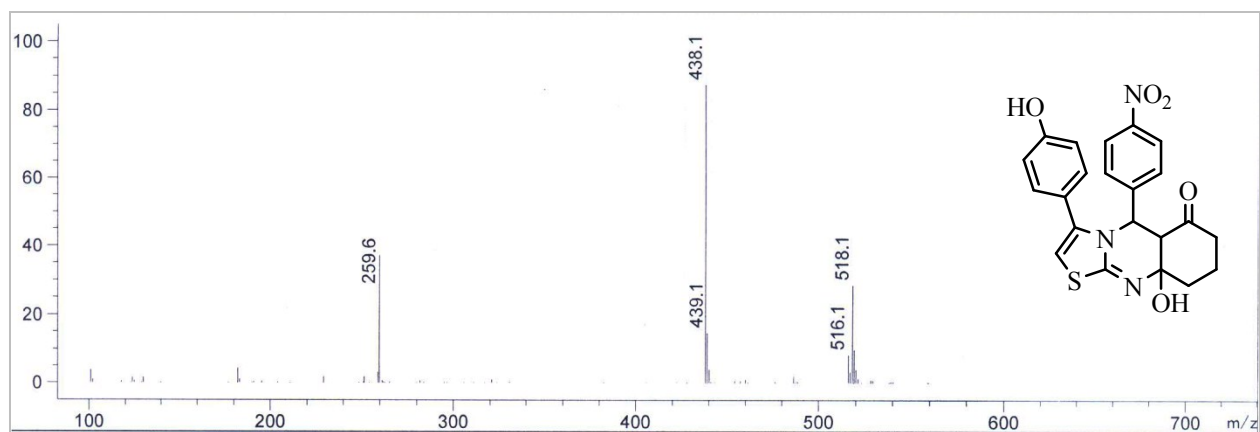

Figure S104. LC-MS spectrum of **5bq**

**5. Table S1. Absorption and Emission maxima at 10  $\mu$ M conc. in MeOH.**

| entry | absorption<br>$\lambda_{\max}$ (nm) | emission<br>$\lambda_{\max}$ (nm) | entry | $\lambda_{\max}$ (nm) | $\lambda_{\text{em}}$ (nm) |
|-------|-------------------------------------|-----------------------------------|-------|-----------------------|----------------------------|
| 5aa   | 406                                 | 466                               | 5ba   | 406                   | 466                        |
| 5ab   | 378                                 | 464                               | 5bb   | 406                   | 464                        |
| 5ac   | 406                                 | 466                               | 5bc   | 408                   | 468                        |
| 5ad   | 370                                 | 466                               | 5bd   | 402                   | 466                        |
| 5ae   | 406                                 | 466                               | 5be   | 404                   | 462                        |
| 5af   | 276                                 | 462                               | 5bf   | 348                   | 390                        |
| 5ag   | 406                                 | 464                               | 5bg   | 406                   | 464                        |
| 5ah   | 400                                 | 464                               | 5bh   | 400                   | 466                        |
| 5ai   | 276                                 | 358                               | 5bi   | 280                   | 354                        |
| 5aj   | 404                                 | 462                               | 5bj   | 400                   | 454                        |
| 5ak   | 404                                 | 462                               | 5bk   | 404                   | 462                        |
| 5al   | 332                                 | -                                 | 5bl   | 400                   | -                          |
| 5am   | 406                                 | 464                               | 5bm   | 404                   | 464                        |
| 5an   | 404                                 | 464                               | 5bn   | 402                   | 462                        |
| 5ao   | 406                                 | 464                               | 5bo   | 466                   | 524                        |
| 5ap   | 382                                 | -                                 | 5bp   | 572                   | -                          |
| 5aq   | 398                                 | -                                 | 5bq   | 400                   | -                          |
